# Supplementary material for: Diastereoselective and enantioselective capture of chiral zinc enolate using nitroolefins: a rapid access to chiral γ-nitro carbonyl compounds
Source: Royal Society of Chemistry journal article supplement (doi:10.1039/c1ob05903c), 2011-01-01
Supplement: c1ob05903c.pdf [file c1ob05903c.pdf]

# Supporting Information

## Diastereoselective and Enantioselective Capture of Chiral Zinc Enolate Using Nitroolefins: A Rapid Access to Chiral $\gamma$ -Nitro Carbonyl Compounds

Cheng-Yan Ni,<sup>a</sup> Sha-Sha Kan,<sup>a</sup> Quan-Zhong Liu,<sup>\*,a</sup> Tai-Ran Kang<sup>a,b</sup>

<sup>a</sup>Chemical Synthesis and pollution Control Key Laboratory of Sichuan Province; Nanchong, P. R. China; College of Chemistry and Chemical Engineering, China West Normal University, Nanchong 637009, P. R. China. <sup>b</sup>State Key Laboratory of Biotherapy, West China Hospital, Sichuan University, Chengdu, China.

quanzhongliu@sohu.com

### Table of Contents

|                                                                       |         |
|-----------------------------------------------------------------------|---------|
| General information.....                                              | S2      |
| Optimization of conditions.....                                       | S2-S4   |
| Spectra data for all the products <b>4a-v</b> and <b>5a, 5p</b> ..... | S4-S14  |
| References.....                                                       | S14     |
| NMR spectra for compounds <b>4a-v, 5a, 5p</b> .....                   | S15-S38 |
| HPLC spectra for compounds <b>4a-v, 5a, 5p</b> .....                  | S39-S62 |
| X-ray crystallographic data of <b>4d</b> .....                        | S63-S69 |
| X-ray crystallographic data of <b>5a</b> .....                        | S70-S77 |

**General information:** All non-aqueous reactions and manipulations were performed in an argon atmosphere. All solvents before use were dried and degassed by standard methods. All reactions were monitored by TLC with silica gel-coated plates.

NMR spectra were recorded on a Bruker AVANCE-400 spectrometer. Chemical shifts are reported in parts per million (ppm) down field from TMS with the solvent resonance as the internal standard. Coupling constants (J) are reported in Hz and refer to apparent peak multiplications. IR was recorded on a Nicolet 6700. Enantiomeric excess (ee) were determined by HPLC analysis on a Shimadzu LC-20A. The chiral ligands were prepared according to the known method.<sup>[1]</sup> All of the chalcones and nitroolefins used here are known compounds and prepared according to the reported procedure.<sup>[2, 3]</sup>

**Optimization of conditions:**

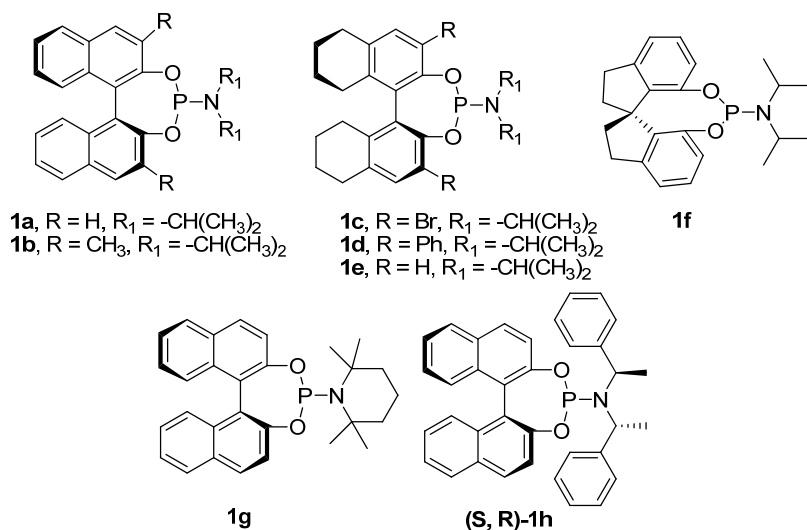

Figure 1 The Ligand investigated in the work.

**Table 1** Phosphoramidites Ligands screening

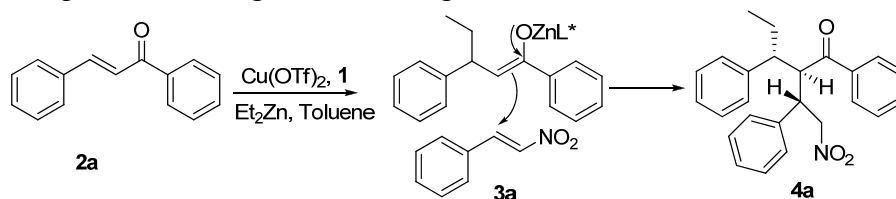

| Entry <sup>[a]</sup> | Ligand        | Yield(%) <sup>[b]</sup> | Dr <sup>[c]</sup> | Ee(%) <sup>[d]</sup> |
|----------------------|---------------|-------------------------|-------------------|----------------------|
| 1                    | <b>1a</b>     | 79                      | >20:1             | 85                   |
| 2                    | <b>1b</b>     | 29                      | >20:1             | 76                   |
| 3                    | <b>1c</b>     | 68                      | >20:1             | 42                   |
| 4                    | <b>1d</b>     | 66                      | >20:1             | 5.0                  |
| 5                    | <b>1e</b>     | 63                      | >20:1             | 70                   |
| 6                    | <b>1f</b>     | 59                      | >20:1             | 52                   |
| 7                    | <b>1g</b>     | 34                      | >20:1             | 13                   |
| 8                    | <b>S,R-1h</b> | 62                      | >20:1             | 73                   |
| 9                    | <b>R,R-1h</b> | 60                      | >20:1             | 48                   |

<sup>[a]</sup> Unless otherwise stated, 0.1 mmol of chalcone was exposed to 0.12 mmol of diethylzinc (1.0 M in hexane) in the presence of 2 mmol%  $\text{Cu}(\text{OTf})_2$  and 4 mmol% of chiral phosphoramidite using toluene as solvent; <sup>[b]</sup> Isolated yields; <sup>[c]</sup> The diastereoselectivity was determined by  $^1\text{H}$  NMR analysis of crude product; <sup>[d]</sup> Enantioselectivities were determined by chiral HPLC.

**Table 2** Lewis acids, reaction medium and temperature screening

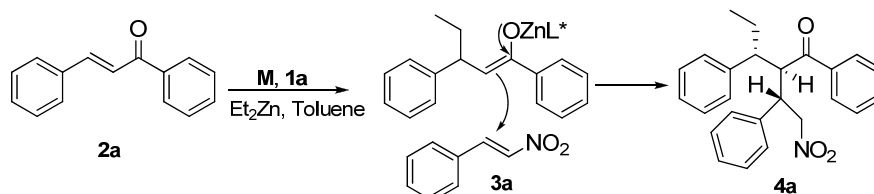

| Entry <sup>[a]</sup> | Metal                                   | Solvent                  | Yield(%) <sup>[b]</sup> | Dr <sup>[c]</sup> | Ee(%) <sup>[d]</sup> |
|----------------------|-----------------------------------------|--------------------------|-------------------------|-------------------|----------------------|
| 1                    | $\text{Cu}(\text{OTf})_2$               | Toluene                  | 79                      | >20:1             | 85                   |
| 2                    | $(\text{CuOTf})_2 \cdot \text{Toluene}$ | Toluene                  | 16                      | >20:1             | 76                   |
| 3                    | $\text{CuCl}$                           | Toluene                  | 29                      | >20:1             | 80                   |
| 4                    | $\text{CuBr}$                           | Toluene                  | 64                      | >20:1             | 88                   |
| 5                    | $\text{CuI}$                            | Toluene                  | 17                      | >20:1             | 17                   |
| 6                    | $\text{CuBr}_2$                         | Toluene                  | 24                      | >20:1             | 24                   |
| 7                    | $\text{AgCl}$                           | Toluene                  | 11                      | >20:1             | 0                    |
| 8                    | $\text{Pd}(\text{OAc})_2$               | Toluene                  | <5                      | --                | --                   |
| 9                    | $\text{CuCl}_2$                         | Toluene                  | 40                      | >20:1             | 83                   |
| 10                   | $\text{Cu}(\text{OAc})_2$               | Toluene                  | 46                      | >20:1             | 0                    |
| 11                   | $\text{Cu}(\text{OTf})_2$               | THF                      | <5                      | --                | --                   |
| 12                   | $\text{Cu}(\text{OTf})_2$               | $\text{CHCl}_3$          | <5                      | --                | --                   |
| 13                   | $\text{Cu}(\text{OTf})_2$               | $\text{CH}_2\text{Cl}_2$ | 32                      | >20:1             | 74                   |
| 14                   | $\text{Cu}(\text{OTf})_2$               | $\text{Et}_2\text{O}$    | 21                      | >20:1             | 66                   |
| 15 <sup>[e]</sup>    | $\text{Cu}(\text{OTf})_2$               | Toluene                  | 66                      | >20:1             | 88                   |

|                   |                      |         |    |       |    |
|-------------------|----------------------|---------|----|-------|----|
| 16 <sup>[f]</sup> | Cu(OTf) <sub>2</sub> | Toluene | 57 | >20:1 | 82 |
| 17 <sup>[g]</sup> | Cu(OTf) <sub>2</sub> | Toluene | 71 | >20:1 | 89 |
| 18 <sup>[h]</sup> | Cu(OTf) <sub>2</sub> | Toluene | 72 | >20:1 | 85 |

<sup>[a]</sup> Unless otherwise stated, the reaction was carried out the presence of 2 mmol% of Lewis acid and 4 mmol% of **1a** at -20 °C; <sup>[b]</sup> Isolated yields; <sup>[c]</sup> Drs were evaluated according the <sup>1</sup>H NMR analysis of crude product; <sup>[d]</sup> Ees were determined by chiral HPLC; <sup>[e]</sup> The reaction was carried out at -40 °C; <sup>[f]</sup> The reaction was carried out at -60 °C; <sup>[g]</sup> The reaction was carried out at -40 °C in the presence of 3 mmol% of Cu(OTf)<sub>2</sub> and 6 mmol% of **1a**. <sup>[h]</sup> The reaction was carried out at -40 °C in the presence of 4 mmol% of Cu(OTf)<sub>2</sub> and 8 mmol% of **1a**.

#### General procedure for the Copper-Catalyzed Enantioselective Tandem Conjugate Addition

**Reaction:** Under an argon atmosphere, a solution of Cu(OTf)<sub>2</sub> (2.2 mg, 0.006 mmol) and the monodentate phosphoramidite **1a** (5.0 mg, 0.012 mmol) in toluene (1.0 mL) was stirred at room temperature for 1 h. The colorless solution was cooled (-40 °C) and the chalcone (41.6 mg, 0.20 mmol) and the diethylzinc solution (1.2 equiv) in hexane (1.0 M, 0.24 mL, 0.24 mmol) were added. After 10 h at -40 °C, trans-β-nitrostyrene (44.7 mg, 0.30 mmol, 1.5 equiv) in anhydrous toluene (1.0 mL) was added. After stirring the mixture for 12 h, sat. aq NH<sub>4</sub>Cl (10 mL) was added to the reaction mixture, and then the reaction mixture was extracted with EtOAc (3 × 10 mL). The combined organic phase were washed with brine (3 × 5 mL) and dried over anhydrous Na<sub>2</sub>SO<sub>4</sub>. The solvent was then removed under vacuum. Purification by flash chromatography on silica gel (PE/EtOAc = 50:1V/V) afforded the corresponding addition product.

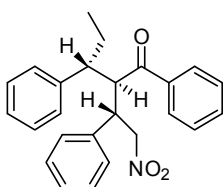

(**4a**)  $R_f$  = 0.26 (ethyl acetate/PE = 1:20), yield: 71%, white solid, mp: 99-100 °C,  $[\alpha]_D^{25} = +28.4^\circ$  (EtOAc,  $c$  0.24). Single diastereoisomer (dr: >20:1), 89% *ee* determined by HPLC analysis (chiral AS-H column, 10% IPA in hexane, rate: 1.0 mL/min, 254 nm). Retention time:  $t$  (major) = 6.3 min,  $t$  (minor) = 7.4 min. <sup>1</sup>H NMR (400 MHz, CDCl<sub>3</sub>):  $\delta$  (ppm) 0.59 (t,  $J$  = 7.2 Hz, 3H), 1.43-1.56 (m, 2H), 2.95 (td,  $J$  = 10.6, 10.6, 3.6 Hz, 1H), 3.62 (dt,  $J$  = 11.6, 4.4, 4.4 Hz, 1H), 4.14 (dd,  $J$  = 10.0, 4.8 Hz, 1H), 4.93 (dd,  $J$  = 13.6, 3.6 Hz, 1H), 5.04 (dd,  $J$  = 13.6, 11.6 Hz, 1H), 6.96-6.98 (m, 2H), 7.10-7.13 (m, 3H), 7.25-7.34 (m, 5H), 7.39-7.49 (m, 5H). <sup>13</sup>C NMR (100 MHz, CDCl<sub>3</sub>):  $\delta$  (ppm) 203.9, 140.8, 138.6, 138.1, 133.1, 129.0, 128.7, 128.3, 128.0, 127.9, 127.6, 127.3, 75.2, 56.0, 49.4, 44.0, 26.9 and 12.1. HRMS calcd for C<sub>25</sub>H<sub>26</sub>NO<sub>3</sub> [M+H]. 388.1913, found: 388.1907. IR (KBr): 3064, 3027, 2965, 2928, 1671, 1548, 1450, 1374, 759, 703 cm<sup>-1</sup>.

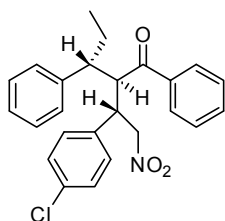

**(4b)**  $R_f = 0.27$  (ethyl acetate/PE = 1:20), yield: 76%, white solid, mp: 86-88°C,  $[\alpha]_D^{25} = +30^\circ$  (EtOAc,  $c$  0.15). Single diastereoisomer (dr: >20:1), 91% *ee* determined by HPLC analysis (chiral AS-H column, 10% IPA in hexane, rate: 1.0 mL/min, 254 nm). Retention time:  $t$  (major) = 6.9 min,  $t$  (minor) = 10.1 min.  $^1\text{H NMR}$  (400 MHz,  $\text{CDCl}_3$ ):  $\delta$  (ppm) 0.59 (t,  $J = 7.2$  Hz, 3H), 1.41-1.54 (m, 2H), 2.92 (td,  $J = 10.4, 10.4, 3.6$  Hz, 1H), 3.58 (dt,  $J = 11.2, 4.4, 4.4$  Hz, 1H), 4.10 (dd,  $J = 10.0, 4.8$  Hz, 1H), 4.92 (dd,  $J = 14.0, 4.4$  Hz, 1H), 4.99 (dd,  $J = 14.0, 11.6$  Hz, 1H), 6.88-6.91 (m, 2H), 7.08-7.12 (m, 2H), 7.24-7.26 (m, 2H), 7.30-7.34 (m, 3H), 7.39-7.43 (m, 2H), 7.48-7.54 (m, 3H).  $^{13}\text{C NMR}$  (100 MHz,  $\text{CDCl}_3$ ):  $\delta$  (ppm) 203.6, 140.6, 138.4, 136.7, 133.5, 133.4, 129.1, 128.9, 128.7, 128.5, 128.0, 127.9, 127.4, 75.1, 55.7, 49.4, 43.5, 27.0 and 12.1. HRMS calcd for  $\text{C}_{25}\text{H}_{25}\text{ClNO}_3$  [M+H]: 422.1523, found: 422.1526. IR (KBr): 3065, 3031, 2966, 2925, 2856, 1673, 1550, 1448, 1383, 843, 756, 706  $\text{cm}^{-1}$ .

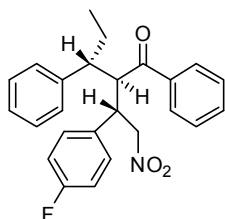

**(4c)**  $R_f = 0.25$  (ethyl acetate/PE = 1:20), yield: 56%, white solid, mp: 124-126 °C,  $[\alpha]_D^{25} = +15.9^\circ$  (EtOAc,  $c$  0.10). Single diastereoisomer (dr: >20:1), 86% *ee* determined by HPLC analysis (chiral AS-H column, 10% IPA in hexane, rate: 1.0 mL/min, 254 nm). Retention time:  $t$  (major) = 7.0 min,  $t$  (minor) = 9.5 min.  $^1\text{H NMR}$  (400 MHz,  $\text{CDCl}_3$ ):  $\delta$  (ppm) 0.59 (t,  $J = 7.2$  Hz, 3H), 1.39-1.55 (m, 2H), 2.93 (td,  $J = 10.6, 10.6, 4.0$  Hz, 1H), 3.59 (dt,  $J = 11.2, 4.4, 4.4$  Hz, 1H), 4.11 (dd,  $J = 10.4, 4.8$  Hz, 1H), 4.92 (dd,  $J = 13.6, 4.0$  Hz, 1H), 5.00 (dd,  $J = 13.6, 11.2$  Hz, 1H), 6.79-6.84 (m, 2H), 6.92-6.95 (m, 2H), 7.25-7.34 (m, 5H), 7.40-7.53 (m, 5H).  $^{13}\text{C NMR}$  (100 MHz,  $\text{CDCl}_3$ ):  $\delta$  (ppm) 203.7, 163.1, 160.7, 140.7, 138.4, 133.9, 133.8, 133.4, 129.1, 128.9, 128.9, 128.5, 128.0, 127.9, 127.4, 115.8, 115.6, 75.3, 55.9, 49.4, 43.4, 27.1 and 12.1. HRMS calcd for  $\text{C}_{25}\text{H}_{25}\text{FNO}_3$  [M+H]: 406.1818, found: 406.1812. IR (KBr): 3062, 2965, 2929, 2874, 1668, 1552, 1448, 1379, 843, 733, 702  $\text{cm}^{-1}$ .

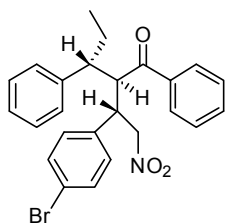

**(4d)**  $R_f = 0.24$  (ethyl acetate/PE = 1:20), yield: 60%, white solid, mp: 68-70°C,  $[\alpha]_D^{25} = +11.1^\circ$  (EtOAc,  $c$  0.22). Single diastereoisomer (dr: >20:1), 90% *ee* determined by HPLC analysis (chiral AS-H column, 10% IPA in hexane, rate: 1.0 mL/min, 254 nm). Retention time:  $t$  (major) = 7.2 min,  $t$  (minor) = 10.5 min. Recrystallization from a mixed solvent of ethyl acetate and petroleum afforded a single crystal (>99% *ee*) for X-ray analysis.  $^1\text{H NMR}$  (400 MHz,  $\text{CDCl}_3$ ):  $\delta$  (ppm) 0.59

(t,  $J = 7.2$  Hz, 3H), 1.41-1.55 (m, 2H), 2.92 (td,  $J = 10.6, 10.6, 4.0$  Hz, 1H), 3.57 (dt,  $J = 11.2, 4.4, 4.4$  Hz, 1H), 4.10 (dd,  $J = 10.0, 4.8$  Hz, 1H), 4.91 (dd,  $J = 13.6, 4.0$  Hz, 1H), 4.98 (dd,  $J = 13.6, 11.2$  Hz, 1H), 6.82-6.85 (m, 2H), 7.24-7.26 (m, 4H), 7.30-7.34 (m, 3H), 7.39-7.43 (m, 2H), 7.48-7.54 (m, 3H).  $^{13}\text{C}$  NMR (100 MHz,  $\text{CDCl}_3$ ):  $\delta$  (ppm) 203.5, 140.7, 138.4, 137.2, 133.4, 131.9, 129.1, 129.0, 128.5, 128.0, 127.9, 127.4, 121.5, 75.1, 55.6, 49.4, 43.6, 27.0 and 12.1. HRMS calcd for  $\text{C}_{25}\text{H}_{25}\text{BrNO}_3$  [M+H]: 466.1018, found: 466.1022. IR (KBr): 3064, 3029, 2963, 2924, 2855, 1672, 1551, 1450, 1381, 842, 742, 705  $\text{cm}^{-1}$ .

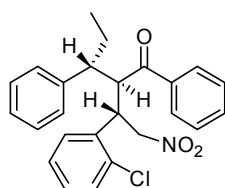

(**4e**)  $R_f = 0.28$  (ethyl acetate/PE = 1:20), yield: 27%, colorless sticky oil,  $[\alpha]_{\text{D}}^{25} = +21.7^\circ$  (EtOAc,  $c$  0.13). Major diastereoisomer (dr: 5:1), 89% *ee* determined by HPLC analysis (chiral AD-H column, 3% IPA in hexane, rate: 1.0 mL/min, 254 nm). Retention time:  $t$  (major) = 19.9 min,  $t$  (minor) = 41.3 min.  $^1\text{H}$  NMR (400 MHz,  $\text{CDCl}_3$ ):  $\delta$  (ppm) 0.60 (t,  $J = 7.6$  Hz, 3H), 1.43-1.50 (m, 2H), 2.94-3.00 (m, 1H), 4.09 (dt,  $J = 12.0, 4.0, 4.0$  Hz, 1H), 4.35 (dd,  $J = 10.4, 4.8$  Hz, 1H), 4.96 (dd,  $J = 14.0, 3.2$  Hz, 1H), 5.25 (dd,  $J = 14.0, 12.0$  Hz, 1H), 6.83-7.08 (m, 5H), 7.25-7.41 (m, 5H), 7.42-7.45 (m, 2H), 7.52-7.54 (m, 2H).  $^{13}\text{C}$  NMR (100 MHz,  $\text{CDCl}_3$ ):  $\delta$  (ppm) 203.9, 139.9, 138.4, 134.9, 133.8, 133.2, 130.1, 128.8, 128.6, 128.4, 128.2, 127.8, 127.5, 127.3, 126.9, 73.6, 51.6, 49.2, 48.3, 24.9 and 12.0. HRMS calcd for  $\text{C}_{25}\text{H}_{25}\text{ClNO}_3$  [M+H]: 422.1523, found: 422.1530. IR (KBr): 3063, 3029, 2966, 2929, 2873, 1670, 1553, 1446, 1380, 756, 703  $\text{cm}^{-1}$ .

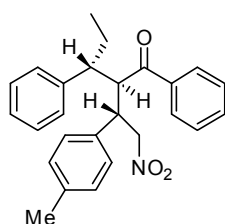

(**4f**)  $R_f = 0.31$  (ethyl acetate/PE = 1:20), yield: 81%, white solid, mp: 97-99  $^\circ\text{C}$ ,  $[\alpha]_{\text{D}}^{25} = +23.5^\circ$  (EtOAc,  $c$  0.27). Single diastereoisomer (dr: >20:1), 88% *ee* determined by HPLC analysis (chiral AS-H column, 10% IPA in hexane, rate: 1.0 mL/min, 254 nm). Retention time:  $t$  (major) = 5.8 min,  $t$  (minor) = 7.3 min.  $^1\text{H}$  NMR (400 MHz,  $\text{CDCl}_3$ ):  $\delta$  (ppm) 0.59 (t,  $J = 7.2$  Hz, 3H), 1.41-1.56 (m, 2H), 2.20 (s, 3H), 2.92 (td,  $J = 10.6, 10.6, 3.6$  Hz, 1H), 3.60 (dt,  $J = 11.6, 4.4, 4.4$  Hz, 1H), 4.12 (dd,  $J = 9.6, 4.8$  Hz, 1H), 4.89 (dd,  $J = 13.6, 4.0$  Hz, 1H), 4.98 (dd,  $J = 13.2, 11.2$  Hz, 1H), 6.85-6.95 (m, 4H), 7.23-7.32 (m, 5H), 7.37-7.41 (m, 2H), 7.43-7.50 (m, 3H).  $^{13}\text{C}$  NMR (100 MHz,  $\text{CDCl}_3$ ):  $\delta$  (ppm) 204.0, 140.9, 138.7, 137.2, 135.0, 133.1, 129.4, 129.0, 128.3, 128.1, 128.0, 127.2, 127.2, 75.6, 56.0, 49.3, 43.8, 26.6, 20.8 and 12.1. HRMS calcd for  $\text{C}_{26}\text{H}_{28}\text{NO}_3$  [M+H]: 402.2069, found: 402.2062. IR (KBr): 3030, 2962, 1660, 1548, 1447, 1378, 834, 734, 700  $\text{cm}^{-1}$ .

(**4g**)  $R_f = 0.17$  (ethyl acetate/PE = 1:20), yield: 74%, white solid, mp: 60-62  $^\circ\text{C}$ ,  $[\alpha]_{\text{D}}^{25} = +30.1^\circ$

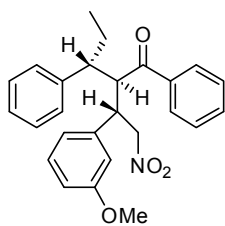

(EtOAc, *c* 0.17). Single diastereoisomer (dr: >20:1), 96% *ee* determined by HPLC analysis (chiral AS-H column, 3% IPA in hexane, rate: 1.0 mL/min, 254 nm). Retention time: *t* (major) = 13.7 min, *t* (minor) = 16.6 min. <sup>1</sup>H NMR (400 MHz, CDCl<sub>3</sub>): δ (ppm) 0.59 (t, *J* = 7.2 Hz, 3H), 1.41-1.53 (m, 2H), 2.95 (td, *J* = 10.6, 10.6, 3.6 Hz, 1H), 3.55-3.59 (m, 1H), 3.61 (s, 3H), 4.13 (dd, *J* = 10.0, 4.4 Hz, 1H), 4.91 (dd, *J* = 13.6, 4.0 Hz, 1H), 4.99 (dd, *J* = 13.6, 11.2 Hz, 1H), 6.47 (t, *J* = 2.0 Hz, 1H), 6.54-6.56 (m, 1H), 6.65 (2dd, *J* = 8.2, 2.8, 0.8 Hz, 1H), 7.04 (t, *J* = 7.6 Hz, 1H), 7.25-7.33 (m, 5H), 7.38-7.54 (m, 5H). <sup>13</sup>C NMR (100 MHz, CDCl<sub>3</sub>): δ (ppm) 203.8, 159.7, 140.9, 139.7, 138.6, 133.2, 129.8, 129.0, 128.3, 128.1, 128.0, 127.3, 119.6, 113.2, 113.0, 75.2, 55.8, 55.0, 49.4, 44.1, 26.9 and 12.1. HRMS calcd for C<sub>26</sub>H<sub>28</sub>NO<sub>4</sub> [M+H]: 418.2018, found: 418.2014. IR (KBr): 3059, 3026, 2962, 2874, 1662, 1551, 1449, 1378, 873, 779, 731, 701 cm<sup>-1</sup>.

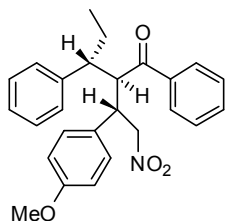

(**4h**) *R<sub>f</sub>* = 0.16 (ethyl acetate/PE = 1:20), yield: 89%, white solid, mp: 63-65 °C, [α]<sub>D</sub><sup>25</sup> = +25.9° (EtOAc, *c* 0.15). Single diastereoisomer (dr: >20:1), 90% *ee* determined by HPLC analysis (chiral AS-H column, 3% IPA in hexane, rate: 0.5 mL/min, 254 nm). Retention time: *t* (major) = 28.1 min, *t* (minor) = 33.5 min. <sup>1</sup>H NMR (400 MHz, CDCl<sub>3</sub>): δ (ppm) 0.58 (t, *J* = 7.2 Hz, 3H), 1.41-1.56 (m, 2H), 2.91 (td, *J* = 10.6, 10.6, 3.2 Hz, 1H), 3.58 (dt, *J* = 11.2, 4.4, 4.4 Hz, 1H), 3.69 (s, 3H), 4.11 (dd, *J* = 10.0, 5.2 Hz, 1H), 4.88 (dd, *J* = 13.2, 4.0 Hz, 1H), 4.96 (dd, *J* = 13.2, 11.2 Hz, 1H), 6.64-6.68 (m, 2H), 6.87-6.90 (m, 2H), 7.23-7.25 (m, 2H), 7.29-7.32 (m, 3H), 7.37-7.52 (m, 5H). <sup>13</sup>C NMR (100 MHz, CDCl<sub>3</sub>): δ (ppm) 204.0, 158.8, 140.9, 138.6, 133.1, 130.0, 129.0, 128.4, 128.3, 128.1, 128.0, 127.2, 114.1, 75.7, 56.1, 55.1, 49.3, 43.4, 26.7 and 12.1. HRMS calcd for C<sub>26</sub>H<sub>28</sub>NO<sub>4</sub> [M+H]: 418.2018, found: 418.2013. IR (KBr): 3027, 2965, 2927, 2872, 1669, 1552, 1449, 1379, 811, 757, 702 cm<sup>-1</sup>.

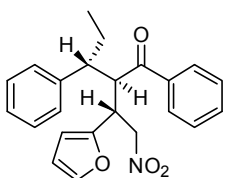

(**4i**) *R<sub>f</sub>* = 0.30 (ethyl acetate/PE = 1:20), yield: 64%, colorless sticky oil, [α]<sub>D</sub><sup>25</sup> = +65.3° (EtOAc, *c* 0.21). Single diastereoisomer (dr: >20:1), 92% *ee* determined by HPLC analysis (chiral OD-H column, 5% IPA in hexane, rate: 0.5 mL/min, 254 nm). Retention time: *t* (major) = 26.4 min, *t* (minor) = 38.0 min. <sup>1</sup>H NMR (400 MHz, CDCl<sub>3</sub>): δ (ppm) 0.62 (t, *J* = 7.2 Hz, 3H), 1.45-1.55 (m, 2H), 2.94 (td, *J* = 10.4, 10.4, 4.0 Hz, 1H), 3.71 (dt, *J* = 10.8, 4.0, 4.0 Hz, 1H), 4.34 (dd, *J* = 10.4, 4.8 Hz, 1H), 4.81 (dd, *J* = 13.6, 10.8 Hz, 1H), 4.88 (dd, *J* = 13.2, 4.0 Hz, 1H), 5.94 (dt, *J* = 3.2, 0.4, 0.4 Hz, 1H), 6.06 (dd, *J* = 3.2, 1.6 Hz, 1H), 7.12 (dd, *J* = 2.0, 0.8 Hz, 1H), 7.26-7.33 (m, 3H), 7.35-7.54 (m,

5H), 7.66-7.69 (m, 2H).  $^{13}\text{C}$  NMR (100 MHz,  $\text{CDCl}_3$ ):  $\delta$  (ppm) 203.2, 151.3, 141.8, 140.4, 138.1, 133.2, 129.0, 128.4, 128.0, 127.9, 127.3, 110.3, 107.1, 74.2, 53.2, 48.8, 37.9, 27.2 and 12.0. HRMS calcd for  $\text{C}_{23}\text{H}_{24}\text{NO}_4$  [M+H]: 378.1705, found: 378.1711. IR (KBr): 3062, 2961, 2928, 2871, 1670, 1551, 1449, 1383, 735, 703  $\text{cm}^{-1}$ .

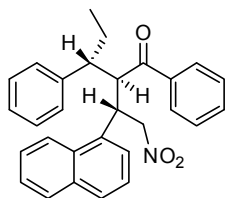

(4j)  $R_f$  = 0.24 (ethyl acetate/PE = 1:20), yield: 42%, white solid, mp: 96-98 °C,  $[\alpha]_{\text{D}}^{25} = +19.4^\circ$  (EtOAc,  $c$  0.12). Single diastereoisomer (dr: >20:1), 90%  $ee$  determined by HPLC analysis (chiral OD-H column, 5% IPA in hexane, rate: 0.5 mL/min, 254 nm). Retention time:  $t$  (major) = 23.3 min,  $t$  (minor) = 39.4 min.  $^1\text{H}$  NMR (400 MHz,  $\text{CDCl}_3$ ):  $\delta$  (ppm) 0.61 (t,  $J$  = 7.2 Hz, 3H), 1.38-1.50 (m, 2H), 3.10 (td,  $J$  = 10.8, 10.8, 4.0 Hz, 1H), 4.20 (dd,  $J$  = 10.8, 4.0 Hz, 1H), 4.44 (dt,  $J$  = 11.6, 3.6, 3.6 Hz, 1H), 5.24 (dd,  $J$  = 14.0, 3.6 Hz, 1H), 5.38 (dd,  $J$  = 14.0, 11.6 Hz, 1H), 6.98-7.04 (m, 2H), 7.07-7.11 (m, 2H), 7.17-7.19 (m, 2H), 7.32-7.37 (m, 1H), 7.45-7.59 (m, 9H), 7.79-7.81 (m, 1H).  $^{13}\text{C}$  NMR (100 MHz,  $\text{CDCl}_3$ ):  $\delta$  (ppm) 204.1, 140.8, 138.5, 134.1, 133.5, 133.0, 130.9, 129.2, 129.1, 128.2, 128.0, 127.7, 126.5, 125.7, 124.7, 123.3, 122.2, 74.5, 54.2, 49.5, 37.8, 27.5 and 12.1. HRMS calcd for  $\text{C}_{29}\text{H}_{28}\text{NO}_3$  [M+H]: 438.2069, found: 438.2073. IR (KBr): 3059, 2964, 2930, 1672, 1551, 1450, 1375, 779, 753, 704  $\text{cm}^{-1}$ .

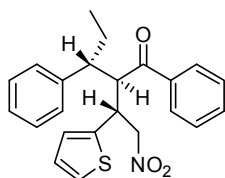

(4k)  $R_f$  = 0.24 (ethyl acetate/PE = 1:20), yield: 68%, colorless sticky oil,  $[\alpha]_{\text{D}}^{25} = +18.7^\circ$  (EtOAc,  $c$  0.20). Single diastereoisomer (dr: >20:1), 93%  $ee$  determined by HPLC analysis (chiral OD-H column, 3% IPA in hexane, rate: 1.0 mL/min, 254 nm). Retention time:  $t$  (major) = 18.5 min,  $t$  (minor) = 46.0 min.  $^1\text{H}$  NMR (400 MHz,  $\text{CDCl}_3$ ):  $\delta$  (ppm) 0.60 (t,  $J$  = 7.2 Hz, 3H), 1.46-1.55 (m, 2H), 2.93 (td,  $J$  = 10.4, 10.4, 4.0 Hz, 1H), 3.92 (dt,  $J$  = 8.4, 5.6, 5.6 Hz, 1H), 4.23 (dd,  $J$  = 9.6, 5.2 Hz, 1H), 4.92 (d,  $J$  = 2.4 Hz, 1H), 4.94 (s, 1H), 6.66 (d,  $J$  = 3.6 Hz, 1H), 6.72 (dd,  $J$  = 5.2, 3.6 Hz, 1H), 7.04 (dd,  $J$  = 5.2, 1.2 Hz, 1H), 7.24-7.26 (m, 2H), 7.28-7.41 (m, 5H), 7.47-7.52 (m, 1H), 7.60-7.62 (m, 2H).  $^{13}\text{C}$  NMR (100 MHz,  $\text{CDCl}_3$ ):  $\delta$  (ppm) 203.6, 141.0, 140.5, 138.6, 133.3, 129.1, 128.4, 128.0, 127.9, 127.4, 126.9, 125.3, 124.4, 76.5, 56.3, 49.2, 39.4, 26.8 and 12.0. HRMS calcd for  $\text{C}_{23}\text{H}_{24}\text{NO}_3\text{S}$  [M+H]: 394.1477, found: 394.1471. IR (KBr): 2958, 2927, 2869, 1667, 1551, 1448, 1384, 746, 700  $\text{cm}^{-1}$ .



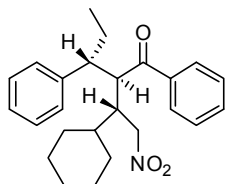

(4l)  $R_f$  = 0.46 (ethyl acetate/PE = 1:20), yield: 25%, colorless sticky oil,  $[\alpha]_D^{25} = +15.4^\circ$  (EtOAc,  $c$  0.28). Single diastereoisomer (dr: >20:1), 79% *ee* determined by HPLC analysis (chiral OD-H column, 1% IPA in hexane, rate: 1.0 mL/min, 254 nm). Retention time:  $t$  (major) = 8.2 min,  $t$  (minor) = 11.4 min. <sup>1</sup>H NMR (400 MHz, CDCl<sub>3</sub>):  $\delta$  (ppm) 0.58 (t,  $J$  = 7.2 Hz, 3H), 0.87-0.99 (m, 5H), 1.06-1.12 (m, 1H), 1.24-1.26 (m, 1H), 1.46-1.57 (m, 5H), 1.62-1.65 (m, 1H), 2.21-2.27 (m, 1H), 2.87 (td,  $J$  = 10.6, 10.6, 4.0 Hz, 1H), 4.18 (dd,  $J$  = 10.4, 2.8 Hz, 1H), 4.54 (dd,  $J$  = 14.0, 10.0 Hz, 1H), 4.97 (dd,  $J$  = 14.0, 2.0 Hz, 1H), 7.24-7.28 (m, 2H), 7.29-7.32 (m, 1H), 7.37-7.40 (m, 2H), 7.54-7.58 (m, 2H), 7.63-7.67 (m, 1H), 8.05-8.07 (m, 2H). <sup>13</sup>C NMR (100 MHz, CDCl<sub>3</sub>):  $\delta$  (ppm) 204.4, 141.2, 138.7, 133.5, 128.9, 128.8, 128.2, 128.1, 127.1, 75.1, 50.2, 48.9, 43.3, 40.1, 30.2, 30.0, 28.0, 26.2, 26.2, 26.0 and 12.4. HRMS calcd for C<sub>25</sub>H<sub>32</sub>NO<sub>3</sub> [M+H]: 394.2382, found: 394.2375. IR (KBr): 3061, 3028, 2928, 2855, 1672, 1550, 1449, 1380, 751, 702 cm<sup>-1</sup>.

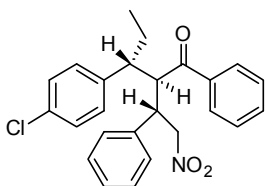

(4m)  $R_f$  = 0.27 (ethyl acetate/PE = 1:20), yield: 61%, white solid, mp: 34-36 °C,  $[\alpha]_D^{25} = +16.9^\circ$  (EtOAc,  $c$  0.16). Single diastereoisomer (dr: >20:1), 94% *ee* determined by HPLC analysis (chiral AD-H column, 5% IPA in hexane, rate: 1.0 mL/min, 254 nm). Retention time:  $t$  (major) = 12.1 min,  $t$  (minor) = 25.6 min. <sup>1</sup>H NMR (400 MHz, CDCl<sub>3</sub>):  $\delta$  (ppm) 0.58 (t,  $J$  = 7.2 Hz, 3H), 1.36-1.56 (m, 2H), 2.92 (td,  $J$  = 10.6, 10.6, 3.2 Hz, 1H), 3.62 (dt,  $J$  = 12.0, 4.0, 4.0 Hz, 1H), 4.09 (dd,  $J$  = 10.0, 5.2 Hz, 1H), 4.87 (dd,  $J$  = 13.6, 3.6 Hz, 1H), 4.99 (dd,  $J$  = 13.2, 11.2 Hz, 1H), 6.96-6.99 (m, 2H), 7.12-7.19 (m, 5H), 7.26-7.30 (m, 2H), 7.35-7.38 (m, 2H), 7.44-7.49 (m, 3H). <sup>13</sup>C NMR (100 MHz, CDCl<sub>3</sub>):  $\delta$  (ppm) 203.4, 139.5, 138.4, 137.8, 133.3, 132.9, 129.2, 129.2, 128.8, 128.4, 128.1, 127.7, 127.3, 75.4, 55.7, 48.7, 44.1, 26.6 and 12.0. HRMS calcd for C<sub>25</sub>H<sub>25</sub>ClNO<sub>3</sub> [M+H]: 422.1523, found: 422.1532. IR (KBr): 2964, 2929, 2873, 1670, 1556, 1451, 1381, 846, 758, 704 cm<sup>-1</sup>.

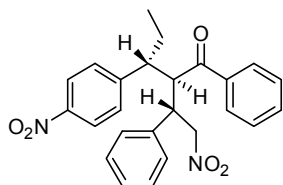

(4n)  $R_f$  = 0.12 (ethyl acetate/PE = 1:20), yield: 72%, yellow solid, mp: 101-103 °C,  $[\alpha]_D^{25} = +18.6^\circ$  (EtOAc,  $c$  0.20). Major diastereoisomer (dr: >20:1), 90% *ee* determined by HPLC analysis (chiral AD-H column, 20% IPA in hexane, rate: 1.0 mL/min, 254 nm). Retention time:  $t$  (major) = 11.2 min,  $t$  (minor) = 21.6 min. <sup>1</sup>H NMR (400 MHz, CDCl<sub>3</sub>):  $\delta$  (ppm) 0.58 (t,  $J$  = 7.2 Hz, 3H), 1.46-1.53 (m, 1H), 1.61-1.69 (m, 1H), 3.03-3.09 (m, 1H), 3.60-3.65 (m, 1H), 4.17 (dd,

$J = 8.8, 5.6$  Hz, 1H), 4.83 (dd,  $J = 13.2, 4.0$  Hz, 1H), 4.92 (dd,  $J = 13.2, 10.8$  Hz, 1H), 6.99-7.01 (m, 2H), 7.16-7.19 (m, 3H), 7.29-7.38 (m, 4H), 7.47-7.52 (m, 3H), 8.20-8.24 (m, 2H).  $^{13}\text{C}$  NMR (100 MHz,  $\text{CDCl}_3$ ):  $\delta$  (ppm) 202.5, 149.0, 147.0, 138.2, 137.4, 133.6, 129.0, 128.9, 128.5, 128.1, 128.0, 127.3, 124.1, 75.8, 55.1, 49.1, 44.4, 25.9 and 11.9. HRMS calcd for  $\text{C}_{25}\text{H}_{25}\text{N}_2\text{O}_5$  [M+H] $^+$ : 433.1763, found: 433.1761. IR (KBr): 2972, 2930, 1666, 1560, 1454, 1383, 754, 703  $\text{cm}^{-1}$ .

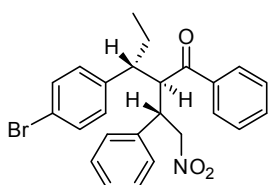

(**4o**)  $R_f = 0.20$  (ethyl acetate/PE = 1:20), yield: 66%, white solid, mp: 55-56 °C,  $[\alpha]_{\text{D}}^{25} = +35.6^\circ$  (EtOAc,  $c$  0.11). Single diastereoisomer (dr: >20:1), 95% *ee* determined by HPLC analysis (chiral AD-H column, 5% IPA in hexane, rate: 1.0 mL/min, 254 nm). Retention time:  $t$  (major) = 12.6 min,  $t$  (minor) = 24.8 min.  $^1\text{H}$  NMR (400 MHz,  $\text{CDCl}_3$ ):  $\delta$  (ppm) 0.57 (t,  $J = 7.2$  Hz, 3H), 1.35-1.54 (m, 2H), 2.91 (td,  $J = 10.6, 10.6, 3.2$  Hz, 1H), 3.62 (dt,  $J = 11.6, 4.0, 4.0$  Hz, 1H), 4.09 (dd,  $J = 9.6, 5.2$  Hz, 1H), 4.87 (dd,  $J = 13.2, 3.6$  Hz, 1H), 4.98 (dd,  $J = 13.6, 11.6$  Hz, 1H), 6.96-6.99 (m, 2H), 7.11-7.15 (m, 5H), 7.26-7.30 (m, 2H), 7.45-7.53 (m, 5H).  $^{13}\text{C}$  NMR (100 MHz,  $\text{CDCl}_3$ ):  $\delta$  (ppm) 203.4, 140.0, 138.4, 137.8, 133.3, 132.1, 129.6, 128.8, 128.4, 128.1, 127.7, 127.3, 121.0, 75.4, 55.7, 48.8, 44.1, 26.5 and 12.0. HRMS calcd for  $\text{C}_{25}\text{H}_{25}\text{BrNO}_3$  [M+H] $^+$ : 466.1018, found: 466.1015. IR (KBr): 2967, 2927, 1671, 1554, 1451, 1382, 844, 756, 703  $\text{cm}^{-1}$ .

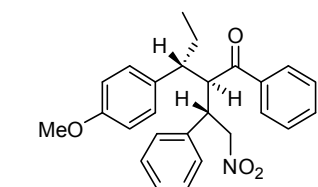

(**4p**)  $R_f = 0.15$  (ethyl acetate/PE = 1:20), yield: 76%, white solid, mp: 46-48 °C,  $[\alpha]_{\text{D}}^{25} = +21.4^\circ$  (EtOAc,  $c$  0.17). Single diastereoisomer (dr: >20:1), 80% *ee* determined by HPLC analysis (chiral AD-H column, 5% IPA in hexane, rate: 1.0 mL/min, 254 nm). Retention time:  $t$  (major) = 13.5 min,  $t$  (minor) = 25.9 min.  $^1\text{H}$  NMR (400 MHz,  $\text{CDCl}_3$ ):  $\delta$  (ppm) 0.58 (t,  $J = 7.2$  Hz, 3H), 1.35-1.53 (m, 2H), 2.89 (td,  $J = 10.6, 10.6, 3.2$  Hz, 1H), 3.62 (dt,  $J = 11.6, 4.0, 4.0$  Hz, 1H), 3.85 (s, 3H), 4.07 (dd,  $J = 10.0, 4.4$  Hz, 1H), 4.93 (dd,  $J = 13.6, 3.6$  Hz, 1H), 5.00-5.07 (m, 1H), 6.93-6.98 (m, 4H), 7.09-7.19 (m, 5H), 7.25-7.28 (m, 2H), 7.43-7.48 (m, 3H).  $^{13}\text{C}$  NMR (100 MHz,  $\text{CDCl}_3$ ):  $\delta$  (ppm) 204.1, 158.6, 138.7, 138.2, 133.1, 132.7, 128.8, 128.7, 128.3, 128.0, 127.5, 127.3, 114.4, 75.2, 56.3, 55.2, 48.6, 44.0, 27.1 and 12.1. HRMS calcd for  $\text{C}_{26}\text{H}_{28}\text{NO}_4$  [M+H] $^+$ : 418.2018, found: 418.2023. IR (KBr): 2963, 2925, 1667, 1551, 1455, 1381, 843, 758, 698  $\text{cm}^{-1}$ .

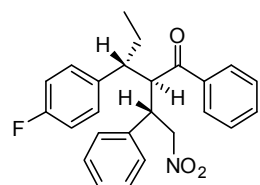

(**4q**)  $R_f = 0.26$  (ethyl acetate/PE = 1:20), yield: 68%, white solid, mp:

88-90 °C,  $[\alpha]_D^{25} = +14.7^\circ$  (EtOAc,  $c$  0.31). Single diastereoisomer (dr: >20:1), 90% *ee* determined by HPLC analysis (chiral AD-H column, 10% IPA in hexane, rate: 1.0 mL/min, 254 nm). Retention time:  $t$  (major) = 9.0 min,  $t$  (minor) = 19.6 min.  $^1\text{H}$  NMR (400 MHz,  $\text{CDCl}_3$ ):  $\delta$  (ppm) 0.58 (t,  $J = 7.2$  Hz, 3H), 1.36-1.56 (m, 2H), 2.93 (td,  $J = 10.6, 10.6, 3.2$  Hz, 1H), 3.62 (dt,  $J = 11.6, 4.4, 4.4$  Hz, 1H), 4.08 (dd,  $J = 9.6, 5.2$  Hz, 1H), 4.88 (dd,  $J = 13.2, 3.6$  Hz, 1H), 4.99 (dd,  $J = 13.2, 11.2$  Hz, 1H), 6.97-6.99 (m, 2H), 7.06-7.15 (m, 5H), 7.19-7.25 (m, 2H), 7.27-7.29 (m, 2H), 7.46-7.49 (m, 3H).  $^{13}\text{C}$  NMR (100 MHz,  $\text{CDCl}_3$ ):  $\delta$  (ppm) 203.6, 163.0, 160.6, 138.5, 137.9, 136.6, 136.6, 133.3, 129.4, 129.3, 128.8, 128.4, 128.0, 127.7, 127.3, 116.0, 115.8, 75.4, 55.9, 48.6, 44.1, 26.7 and 12.0. HRMS calcd for  $\text{C}_{25}\text{H}_{25}\text{FNO}_3$  [M+H]: 406.1818, found: 406.1813. IR (KBr): 2969, 2928, 1670, 1554, 1451, 1382, 832, 754, 699  $\text{cm}^{-1}$ .

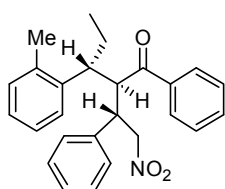

(**4r**)  $R_f = 0.24$  (ethyl acetate/PE = 1:20), yield: 78%, colorless sticky oil,  $[\alpha]_D^{25} = +9.5^\circ$  (EtOAc,  $c$  0.24). Single diastereoisomer (dr: >20:1), 78% *ee* determined by HPLC analysis (chiral AS-H column, 5% IPA in hexane, rate: 1.0 mL/min, 254 nm). Retention time:  $t$  (major) = 6.6 min,  $t$  (minor) = 10.5

min.  $^1\text{H}$  NMR (400 MHz,  $\text{CDCl}_3$ ):  $\delta$  (ppm) 0.58 (t,  $J = 7.6$  Hz, 3H), 1.44-1.54 (m, 1H), 1.62-1.68 (m, 1H), 2.37 (s, 3H), 3.26-3.32 (m, 1H), 3.72 (dt,  $J = 11.6, 4.4, 4.4$  Hz, 1H), 4.14 (dd,  $J = 9.2, 5.2$  Hz, 1H), 4.81 (dd,  $J = 13.6, 3.6$  Hz, 1H), 4.90-4.96 (m, 1H), 6.99-7.01 (m, 2H), 7.15-7.19 (m, 5H), 7.23-7.29 (m, 4H), 7.43-7.49 (m, 3H).  $^{13}\text{C}$  NMR (100 MHz,  $\text{CDCl}_3$ ):  $\delta$  (ppm) 203.8, 139.2, 138.6, 138.1, 136.9, 133.2, 130.9, 128.8, 128.3, 128.1, 127.7, 127.3, 126.6, 126.5, 125.8, 76.1, 55.4, 44.2, 43.2, 26.9, 19.8 and 11.5. HRMS calcd for  $\text{C}_{26}\text{H}_{28}\text{NO}_3$  [M+H]: 402.2069, found: 402.2067. IR (KBr): 3062, 3027, 2965, 2929, 2874, 1669, 1553, 1448, 1380, 760, 700  $\text{cm}^{-1}$ .

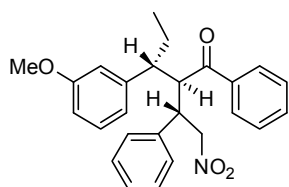

(**4s**)  $R_f = 0.18$  (ethyl acetate/PE = 1:20), yield: 46%, white solid, mp: 79-81 °C,  $[\alpha]_D^{25} = +12.3^\circ$  (EtOAc,  $c$  0.31). Single diastereoisomer (dr: >20:1), 89% *ee* determined by HPLC analysis (chiral AD-H column, 10% IPA in hexane, rate: 1.0 mL/min, 254 nm). Retention

time:  $t$  (major) = 10.4 min,  $t$  (minor) = 22.2 min.  $^1\text{H}$  NMR (400 MHz,  $\text{CDCl}_3$ ):  $\delta$  (ppm) 0.60 (t,  $J = 7.2$  Hz, 3H), 1.38-1.55 (m, 2H), 2.91 (td,  $J = 10.6, 10.6, 3.6$  Hz, 1H), 3.65 (dt,  $J = 11.6, 4.0, 4.0$  Hz, 1H), 3.84 (s, 3H), 4.10 (dd,  $J = 10.0, 4.8$  Hz, 1H), 4.94 (dd,  $J = 13.6, 4.0$  Hz, 1H), 5.04 (dd,  $J = 13.6, 11.6$  Hz, 1H), 6.79-6.99 (m, 5H), 7.09-7.13 (m, 3H), 7.24-7.28 (m, 2H), 7.33 (t,  $J = 7.6$  Hz, 1H), 7.43-7.49 (m, 3H).  $^{13}\text{C}$  NMR (100 MHz,  $\text{CDCl}_3$ ):  $\delta$  (ppm) 203.9, 160.0, 142.6, 138.6, 138.1,

133.1, 130.0, 128.8, 128.3, 128.0, 127.6, 127.3, 120.3, 114.1, 112.0, 75.2, 56.0, 55.2, 49.4, 44.0, 26.9 and 12.1. HRMS calcd for  $C_{26}H_{28}NO_4$  [M+H]: 418.2018, found: 418.2020. IR (KBr): 2970, 2929, 1667, 1549, 1452, 1383, 761, 700  $cm^{-1}$ .

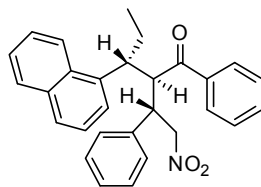

(4t)  $R_f$  = 0.22 (ethyl acetate/PE = 1:20), yield: 53%, colorless sticky oil,  $[\alpha]_D^{25} = +4.8^\circ$  (EtOAc,  $c$  0.15). Single diastereoisomer (dr: >20:1), 76%  $ee$  determined by HPLC analysis (chiral AD-H column, 3% IPA in hexane, rate: 1.0 mL/min, 254 nm). Retention time:  $t$  (major) = 22.6 min,

$t$  (minor) = 25.2 min.  $^1H$  NMR (400 MHz,  $CDCl_3$ ):  $\delta$  (ppm) 0.61 (t,  $J$  = 7.6 Hz, 3H), 1.73-1.81 (m, 1H), 1.93-1.99 (m, 1H), 3.76-3.81 (m, 1H), 3.88-3.94 (m, 1H), 4.25 (t,  $J$  = 7.6 Hz, 1H), 4.66 (dd,  $J$  = 13.2, 4.0 Hz, 1H), 4.82 (dd,  $J$  = 13.6, 11.6 Hz, 1H), 7.14-7.20 (m, 4H), 7.24-7.34 (m, 7H), 7.37-7.41 (m, 1H), 7.51-7.55 (m, 2H), 7.70 (d,  $J$  = 8.0 Hz, 1H), 7.86-7.90 (m, 2H).  $^{13}C$  NMR (100 MHz,  $CDCl_3$ ):  $\delta$  (ppm) 203.1, 138.4, 137.7, 136.9, 134.0, 133.1, 132.6, 129.3, 128.9, 128.2, 128.0, 127.9, 127.7, 127.4, 126.4, 125.6, 125.2, 123.9, 122.2, 74.2, 54.6, 44.3, 41.4, 24.9 and 11.8. HRMS calcd for  $C_{29}H_{28}NO_3$  [M+H]: 438.2069, found: 438.2077. IR (KBr): 3061, 2965, 2927, 1668, 1553, 1451, 1379, 780, 701  $cm^{-1}$ .

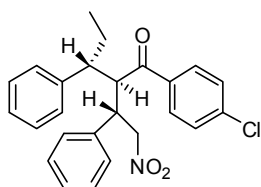

(4u)  $R_f$  = 0.3 (ethyl acetate/PE = 1:20), yield: 63%, white solid, mp: 133-135  $^\circ C$ ,  $[\alpha]_D^{25} = +20.1^\circ$  (EtOAc,  $c$  0.32). Single diastereoisomer (dr: >20:1), 80%  $ee$  determined by HPLC analysis (chiral AD-H column, 10% IPA in hexane, rate: 1.0 mL/min, 254 nm). Retention time:  $t$  (major)

= 9.5 min,  $t$  (minor) = 12.7 min.  $^1H$  NMR (400 MHz,  $CDCl_3$ ):  $\delta$  (ppm) 0.59 (t,  $J$  = 7.2 Hz, 3H), 1.39-1.55 (m, 2H), 2.93 (td,  $J$  = 10.4, 10.4, 3.6 Hz, 1H), 3.61 (dt,  $J$  = 11.6, 4.0, 4.0 Hz, 1H), 4.06 (dd,  $J$  = 10.0, 5.2 Hz, 1H), 4.90 (dd,  $J$  = 13.6, 4.0 Hz, 1H), 5.01 (dd,  $J$  = 13.6, 11.6 Hz, 1H), 6.96-6.98 (m, 2H), 7.12-7.16 (m, 3H), 7.22-7.26 (m, 4H), 7.31-7.43 (m, 5H).  $^{13}C$  NMR (100 MHz,  $CDCl_3$ ):  $\delta$  (ppm) 202.7, 140.6, 139.8, 137.9, 136.9, 129.4, 129.1, 128.9, 128.6, 127.9, 127.8, 127.4, 127.2, 75.0, 56.1, 49.3, 43.9, 26.9 and 12.0. HRMS calcd for  $C_{25}H_{25}ClNO_3$  [M+H]: 422.1523, found: 422.1531. IR (KBr): 3064, 3032, 2965, 2928, 2869, 1673, 1550, 1453, 1384, 757, 701  $cm^{-1}$ .

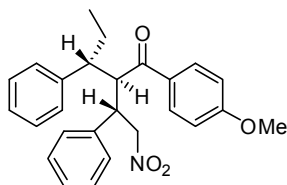

(4v)  $R_f$  = 0.13 (ethyl acetate/PE = 1:20), yield: 56%, white solid, mp: 105-107  $^\circ C$ ,  $[\alpha]_D^{25} = +23.2^\circ$  (EtOAc,  $c$  0.31). Single diastereoisomer

(dr: >20:1), 87% *ee* determined by HPLC analysis (chiral AD-H column, 20% IPA in hexane, rate: 1.0 mL/min, 254 nm). Retention time: *t* (major) = 8.4 min, *t* (minor) = 45.6 min. <sup>1</sup>H NMR (400 MHz, CDCl<sub>3</sub>): δ (ppm) 0.59 (t, *J* = 7.2 Hz, 3H), 1.39-1.56 (m, 2H), 2.93 (td, *J* = 10.6, 10.6, 3.6 Hz, 1H), 3.59 (dt, *J* = 11.6, 4.0, 4.0 Hz, 1H), 3.81 (s, 3H), 4.05 (dd, *J* = 10.0, 4.8 Hz, 1H), 4.92 (dd, *J* = 13.6, 3.6 Hz, 1H), 5.02 (dd, *J* = 13.6, 11.6 Hz, 1H), 6.71-6.75 (m, 2H), 6.95-6.97 (m, 2H), 7.09-7.14 (m, 3H), 7.25-7.34 (m, 3H), 7.39-7.43 (m, 2H), 7.46-7.50 (m, 2H). <sup>13</sup>C NMR (100 MHz, CDCl<sub>3</sub>): δ (ppm) 201.8, 163.5, 141.1, 138.3, 131.8, 130.5, 129.0, 128.7, 128.0, 127.5, 127.3, 127.2, 113.5, 75.3, 55.6, 55.3, 49.3, 44.0, 26.9 and 12.1. HRMS calcd for C<sub>26</sub>H<sub>28</sub>NO<sub>4</sub> [M+H]: 418.2018, found: 418.2010. IR (KBr): 3029, 2966, 2930, 1661, 1598, 1551, 1454, 1381, 758, 702 cm<sup>-1</sup>.

### The synthetic procedure of chiral pyrrolidine derivatives:

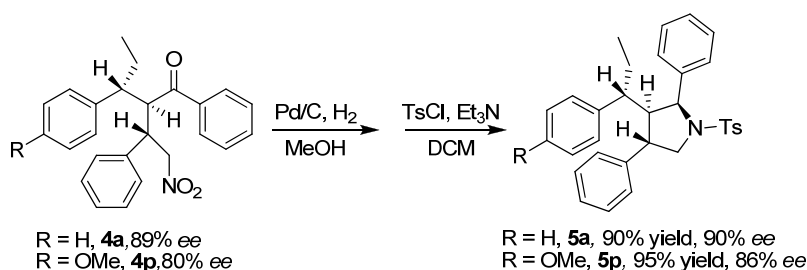

To a test tube was added of **4a** (114 mg, 0.29 mmol), 10% Pd/C (570 mg) in MeOH (2.0 mL) and the mixture was stirred under a H<sub>2</sub> atmosphere (1.0 atm.) at 40 °C for 2 day. After filtering off the catalyst and evaporating the solvent. The residue was dissolved in dry DCM (2.0 mL). To the mixture was added Et<sub>3</sub>N (251 μl) and TsCl (0.87 mmol, 165 mg) dropwise at 0 °C. After the mixture was stirred 24 h at room temperature, cold water was added to the mixture, and it was extracted with DCM. The combined organic phases were washed with brine (3× 10 mL), dried over anhydrous Na<sub>2</sub>SO<sub>4</sub>, and concentrated under reduced pressure. The crude product was subjected to chromatography (PE/EtOAc, 20:1) to obtain pure product **5a** in 90% yield for two steps. *R<sub>f</sub>* = 0.58 (ethyl acetate/PE = 1:5), yield: 90%, white solid, mp: 180-182 °C. [α]<sub>D</sub><sup>25</sup> = -3.7° (EtOAc, *c* 0.15). 90% *ee* determined by HPLC analysis (chiral AD-H column, 3% IPA in hexane, rate: 1.0 mL/min, 254 nm). Retention time: *t* (major) = 17.8 min, *t* (minor) = 23.1 min. Recrystallization from a mixed solvent of ethyl acetate and petroleum afforded a single crystal (>99% *ee*) for X-ray analysis. <sup>1</sup>H NMR (400 MHz, CDCl<sub>3</sub>): δ (ppm) 0.27 (t, *J* = 7.2 Hz, 3H), 1.32-1.40 (m, 1H), 1.68-1.74 (m, 1H), 1.88 (td, *J* = 10.6, 10.6, 2.8 Hz, 1H), 2.40 (s, 3H), 2.89 (td, *J* = 10.4, 10.4, 8.0 Hz, 1H), 3.25 (dt, *J* = 11.6, 8.8, 8.8 Hz, 1H), 3.49 (dd, *J* = 10.4, 8.8 Hz, 1H),

3.85 (dd,  $J = 10.0, 9.6$  Hz, 1H), 5.36 (d,  $J = 7.6$  Hz, 1H), 6.46-6.55 (m, 4H), 6.70-6.81 (m, 3H), 6.89-6.90 (m, 3H), 7.12 (d,  $J = 8.4$  Hz, 2H), 7.20-7.22 (m, 2H), 7.29-7.31 (m, 3H), 7.37-7.39 (m, 2H).  $^{13}\text{C}$  NMR (100 MHz,  $\text{CDCl}_3$ ):  $\delta$  (ppm) 142.7, 141.6, 140.4, 139.0, 135.6, 129.1, 128.6, 128.6, 128.2, 127.9, 127.5, 127.3, 127.2, 127.1, 125.8, 125.5, 67.6, 56.7, 56.3, 48.1, 47.9, 27.6, 21.4 and 11.4. HRMS calcd for  $\text{C}_{32}\text{H}_{34}\text{NO}_2\text{S}$  [M+H]: 496.2310, found: 496.2303. IR (KBr): 3029, 2945, 2865, 1454, 1339, 1160, 762, 701, 664  $\text{cm}^{-1}$ .

(**5p**)  $R_f = 0.51$  (ethyl acetate/PE = 1:5), yield: 95%, white solid, mp: 154-155 °C,  $[\alpha]_{\text{D}}^{25} = -0.7^\circ$  (EtOAc,  $c$  0.43). 86% *ee* determined by HPLC analysis (chiral AD-H column, 3% IPA in hexane, rate: 1.0 mL/min, 235 nm). Retention time:  $t$  (major) = 27.8 min,  $t$  (minor) = 41.5 min.  $^1\text{H}$  NMR (400 MHz,  $\text{CDCl}_3$ ):  $\delta$  (ppm) 0.29 (t,  $J = 7.2$  Hz, 3H), 1.26-1.36 (m, 1H), 1.67-1.78 (m, 1H), 1.81 (td,  $J = 10.8, 10.8, 2.8$  Hz, 1H), 2.40 (s, 3H), 2.80-2.87 (m, 1H), 3.21 (dt,  $J = 11.6, 8.8, 8.8$  Hz, 1H), 3.49 (dd,  $J = 10.4, 8.8$  Hz, 1H), 3.63 (s, 3H), 3.84 (dd,  $J = 10.4, 9.2$  Hz, 1H), 5.34 (d,  $J = 8.0$  Hz, 1H), 6.23-6.38 (m, 4H), 6.54-6.66 (m, 2H), 6.92-6.93 (m, 3H), 7.12-7.22 (m, 4H), 7.29-7.30 (m, 3H), 7.37-7.40 (m, 2H).  $^{13}\text{C}$  NMR (100 MHz,  $\text{CDCl}_3$ ):  $\delta$  (ppm) 157.5, 142.7, 141.7, 139.1, 135.7, 132.6, 131.4, 130.3, 129.4, 129.1, 128.5, 128.2, 127.8, 127.5, 127.4, 127.1, 125.4, 112.7, 67.6, 56.7, 56.6, 55.0, 48.0, 47.2, 27.7, 21.4 and 11.4. HRMS calcd for  $\text{C}_{33}\text{H}_{36}\text{NO}_3\text{S}$  [M+H]: 526.2416, found: 526.2415. IR (KBr): 3029, 2926, 1511, 1456, 1348, 1246, 1165, 702, 666  $\text{cm}^{-1}$ .

## References

- [1] R. B. C. Jagt, P. Y. Toullec, E. P. Schudde, J. G. de Vries, B. L. Feringa, A. J. Minnaard, A. J. *J. Comb. Chem.* **2007**, *9*, 407
- [2] Z. A. Kaplancikli, G. Turan-Zitouni, A. Özdemir, Ö. D. Can, P. Chevallet, *Eur. J. Med. Chem.* **2009**, *44*, 2606
- [3] R. K. Bowman, J. S. Johnson, *J. Org. Chem.* **2004**, *69*, 8537

### NMR spectra for compounds 4a-v, 5a, 5p

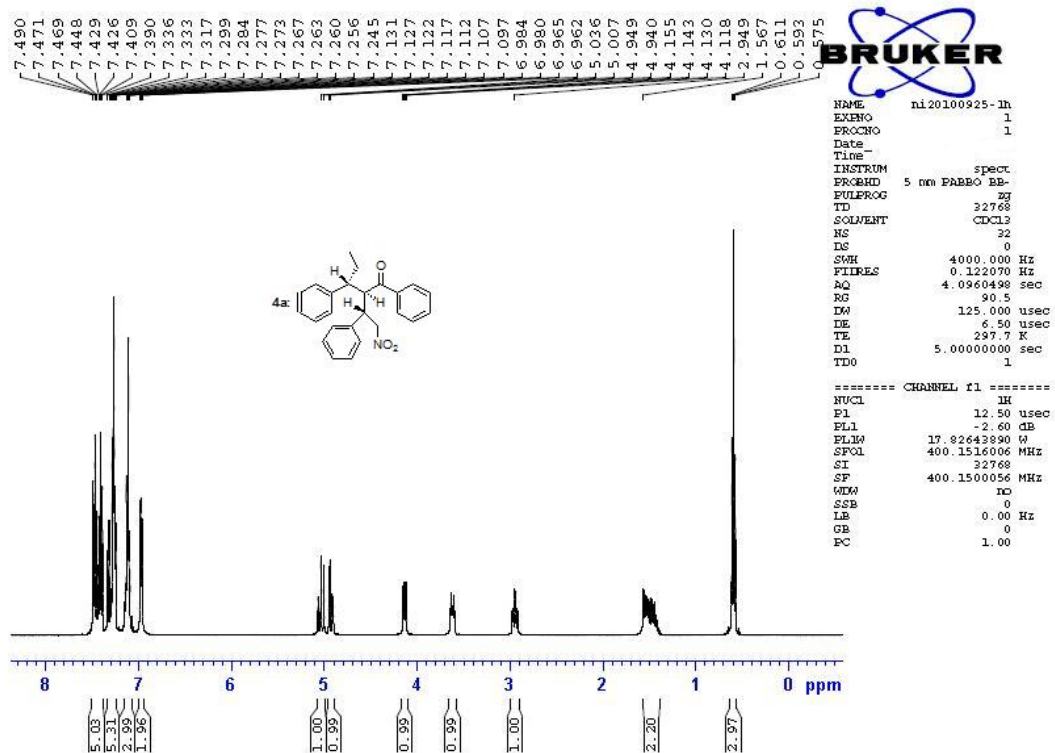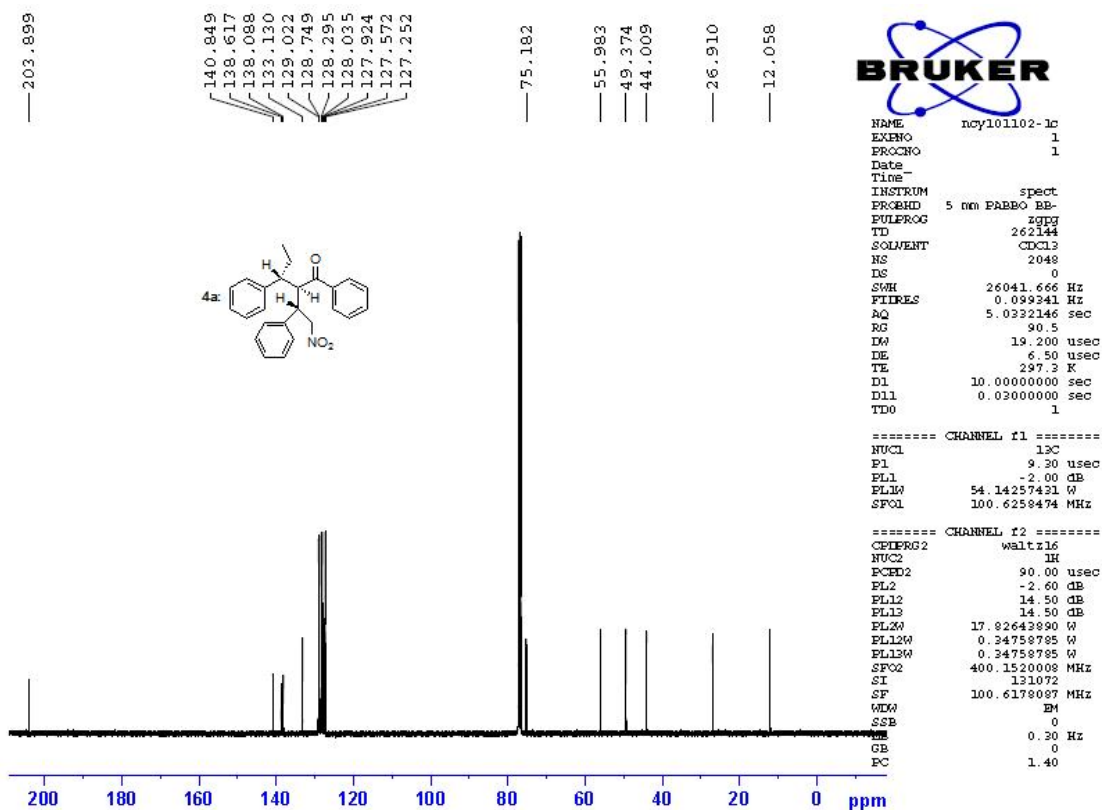



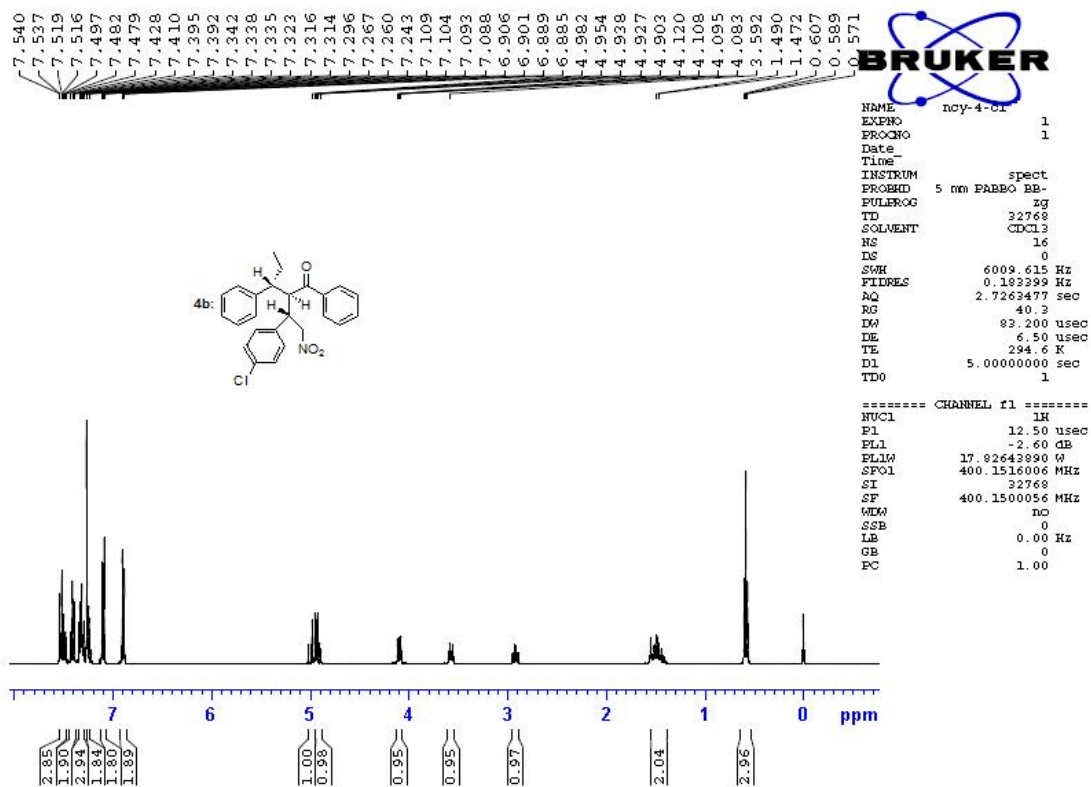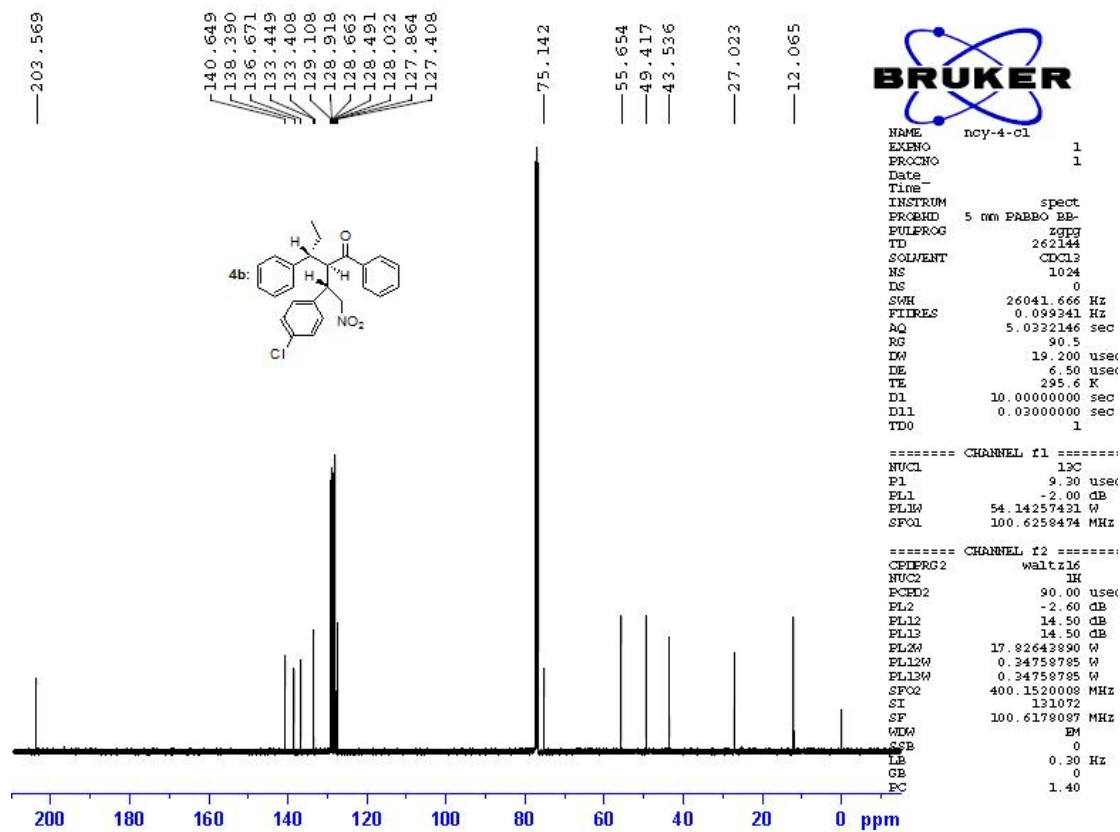



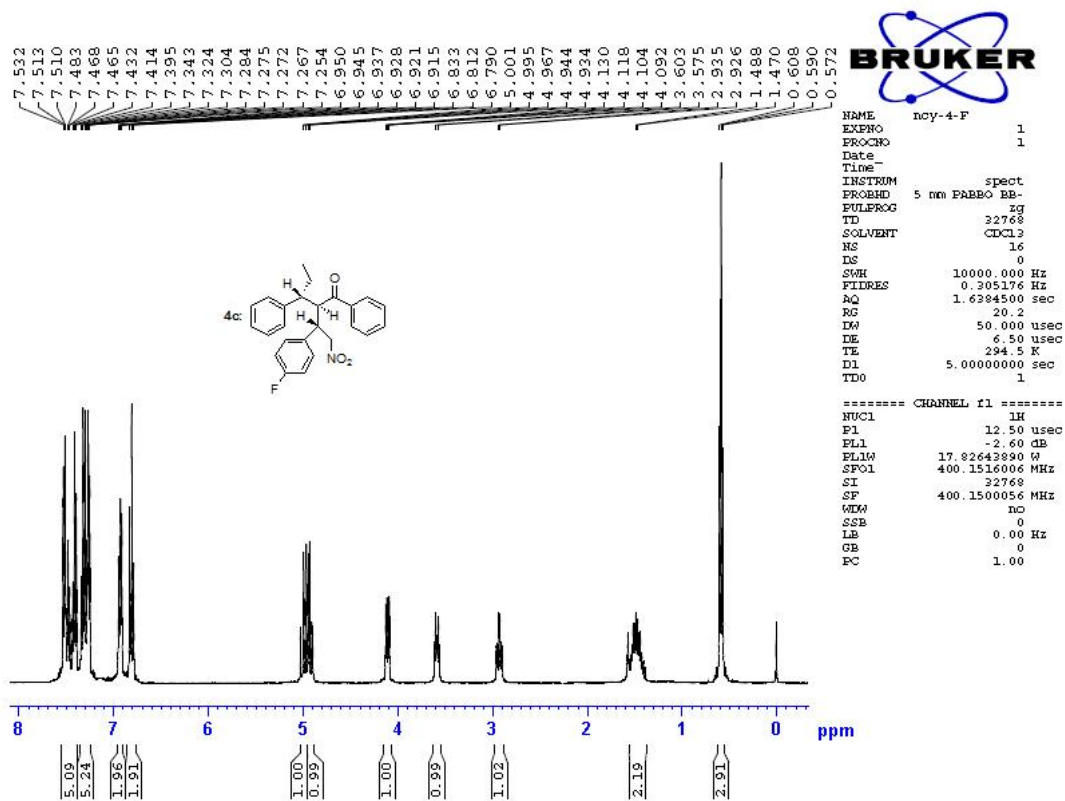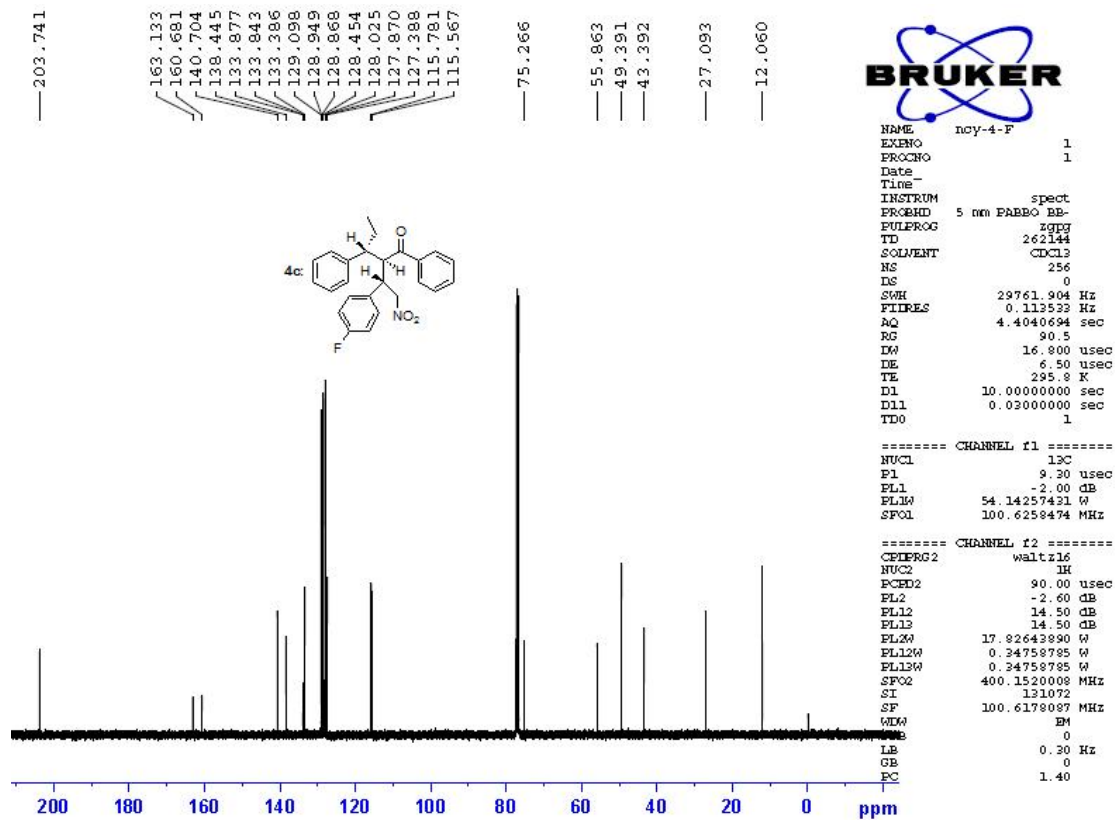

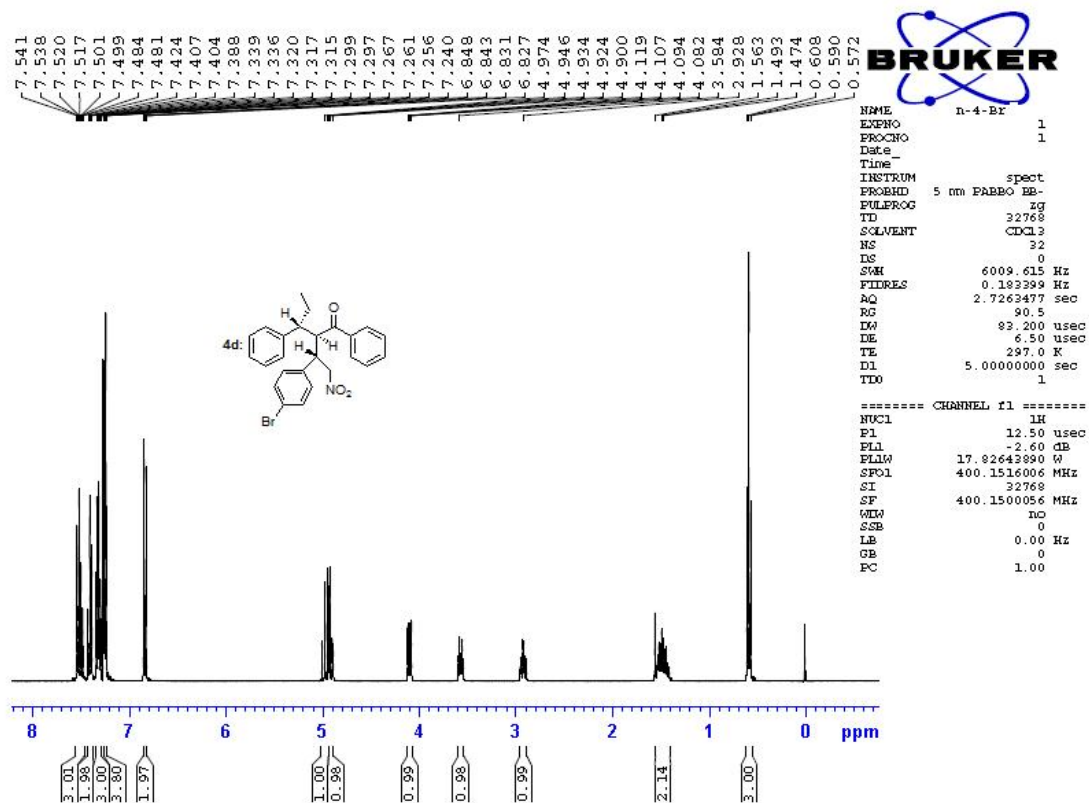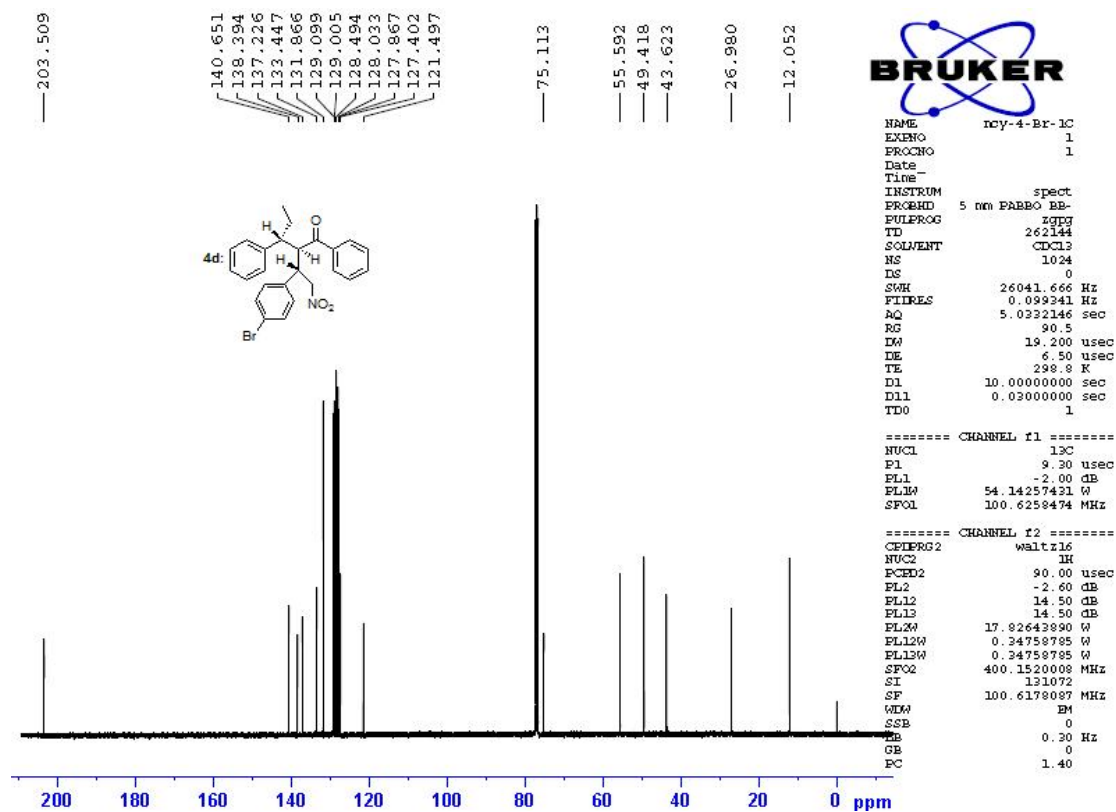

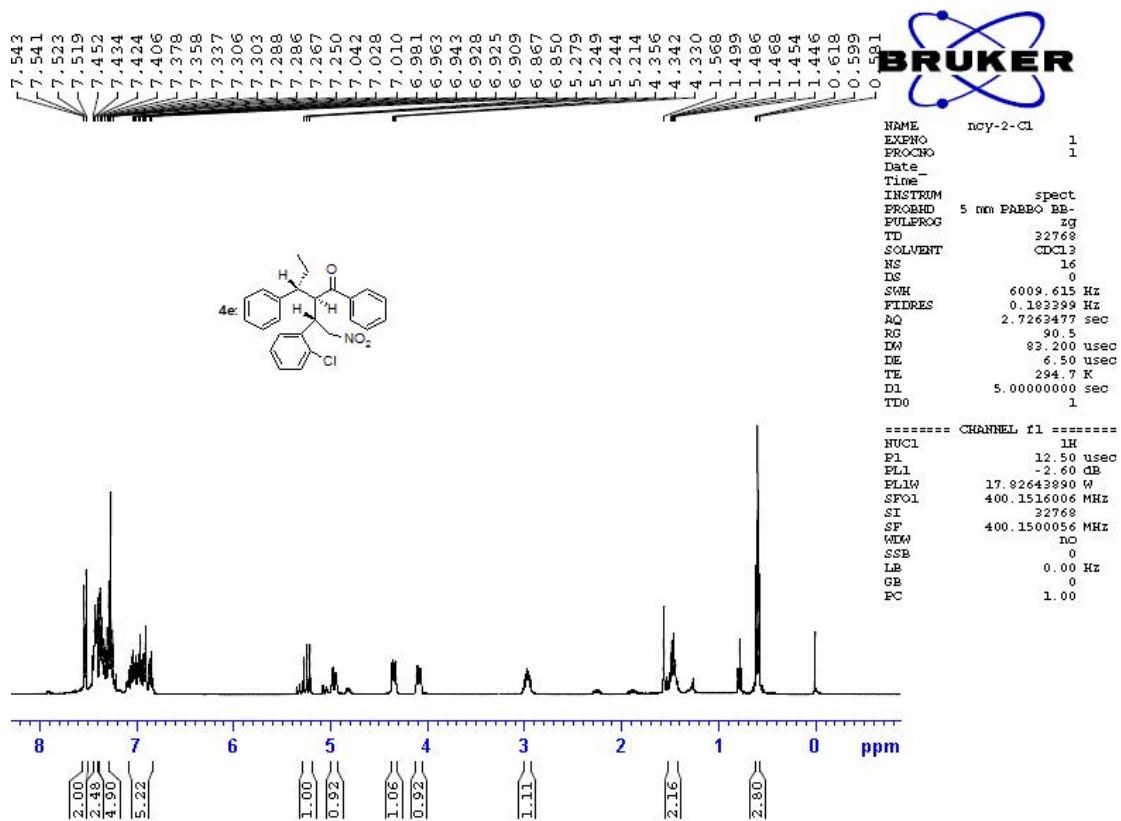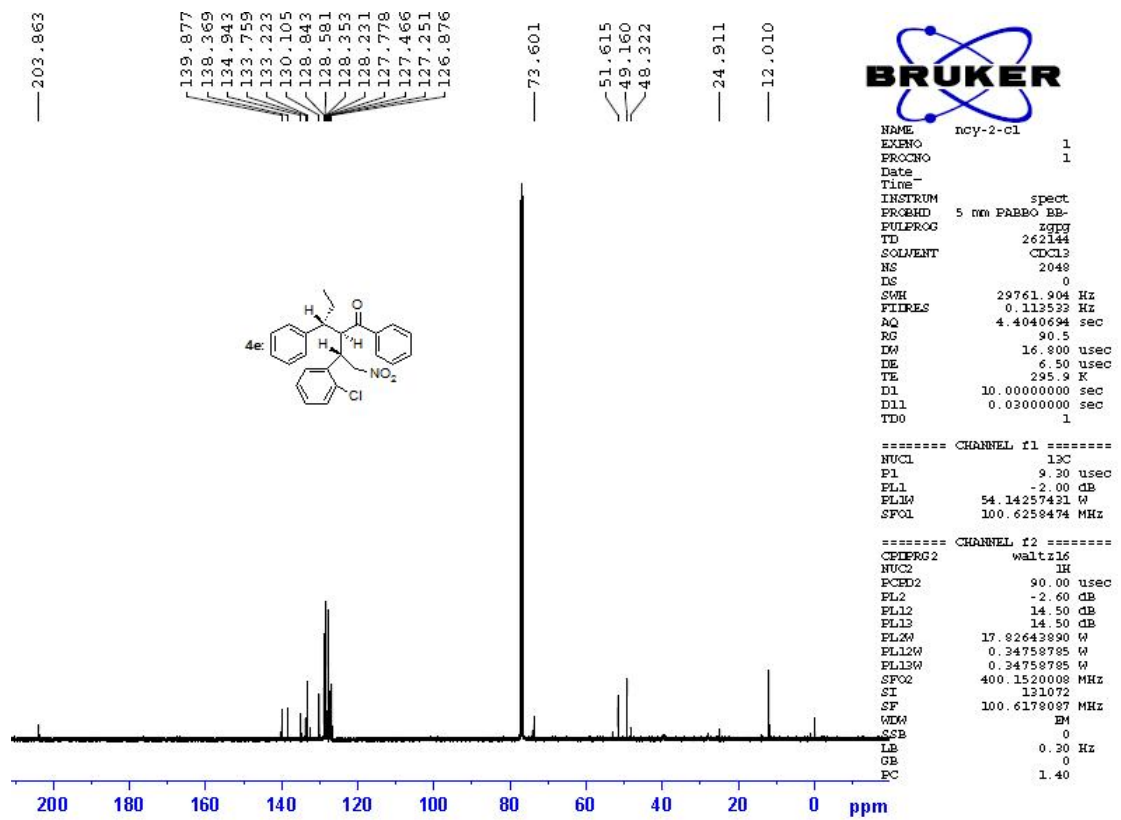

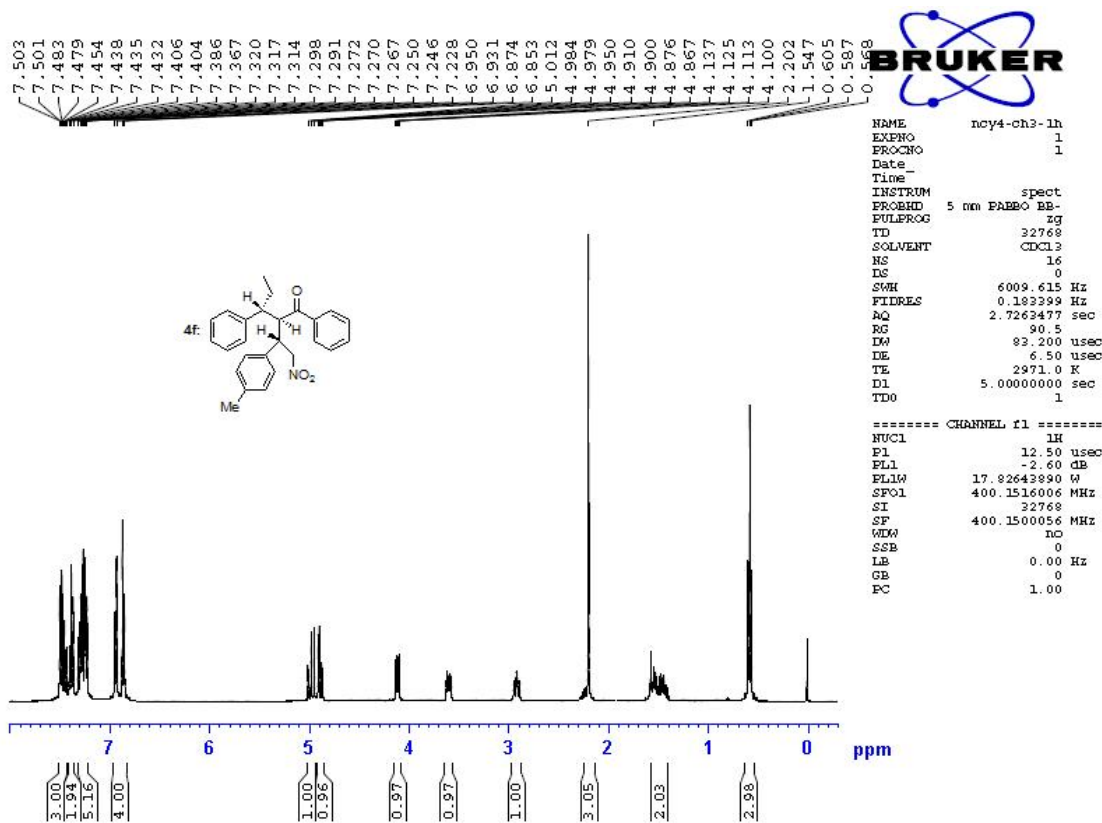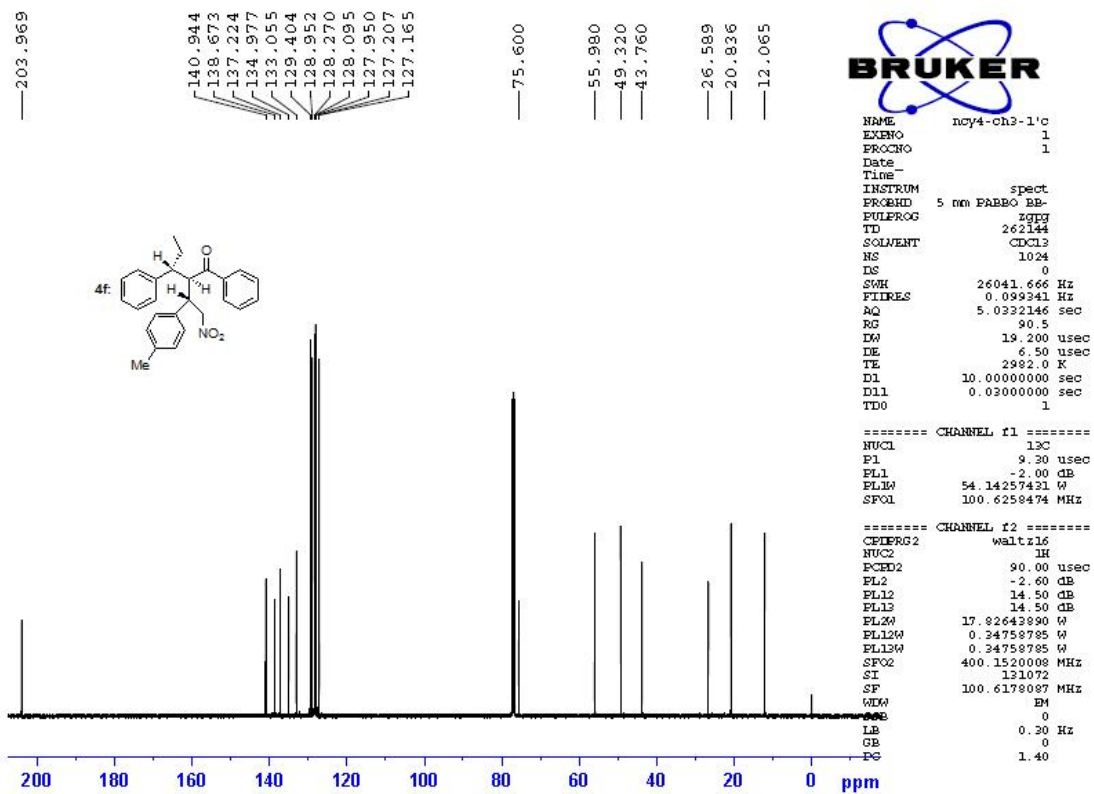

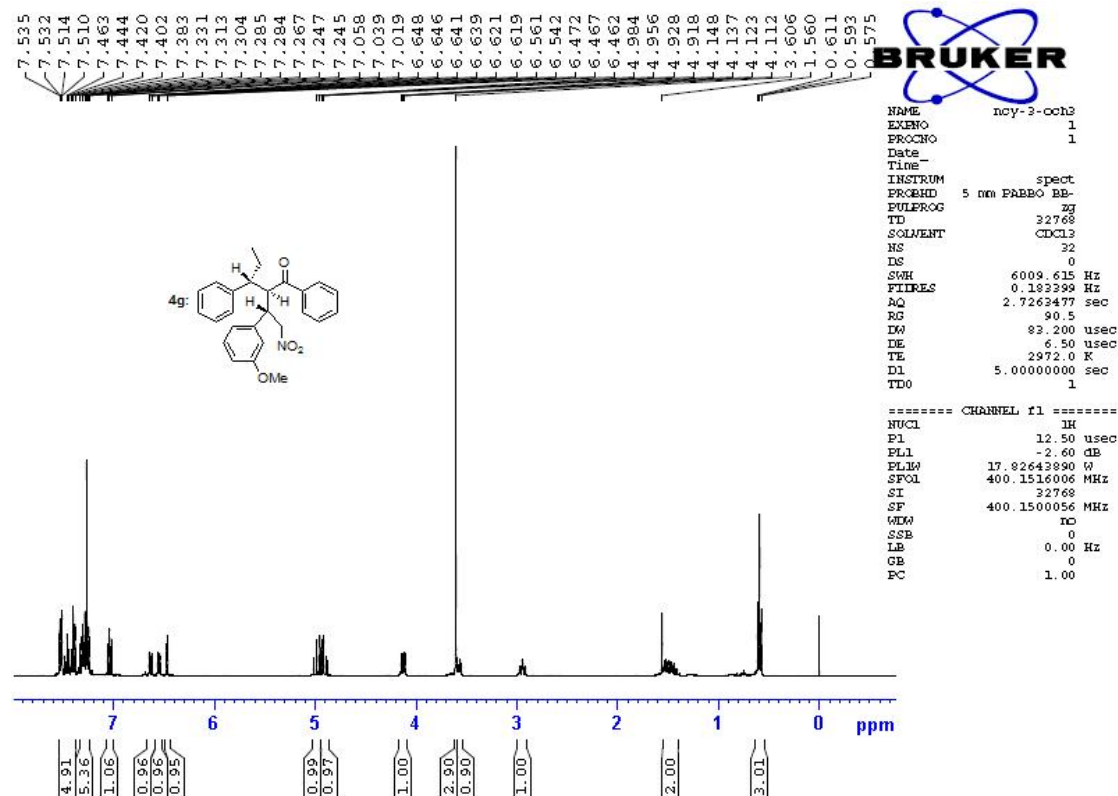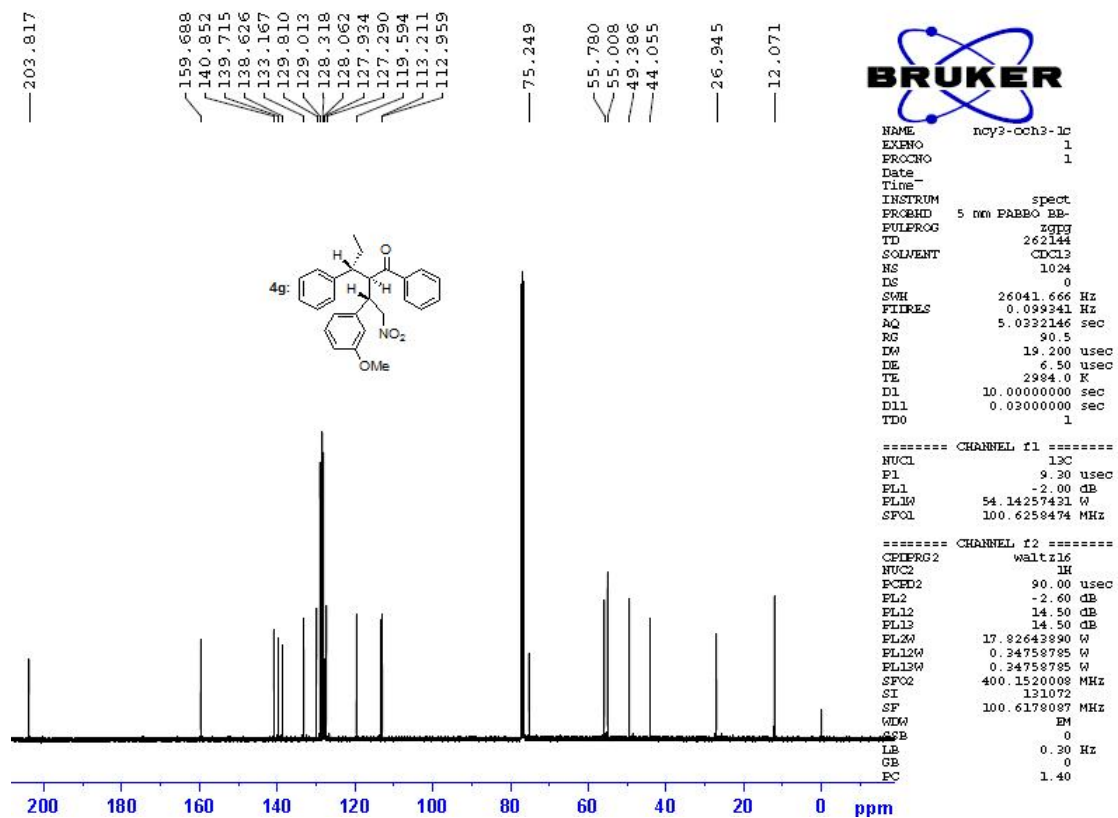



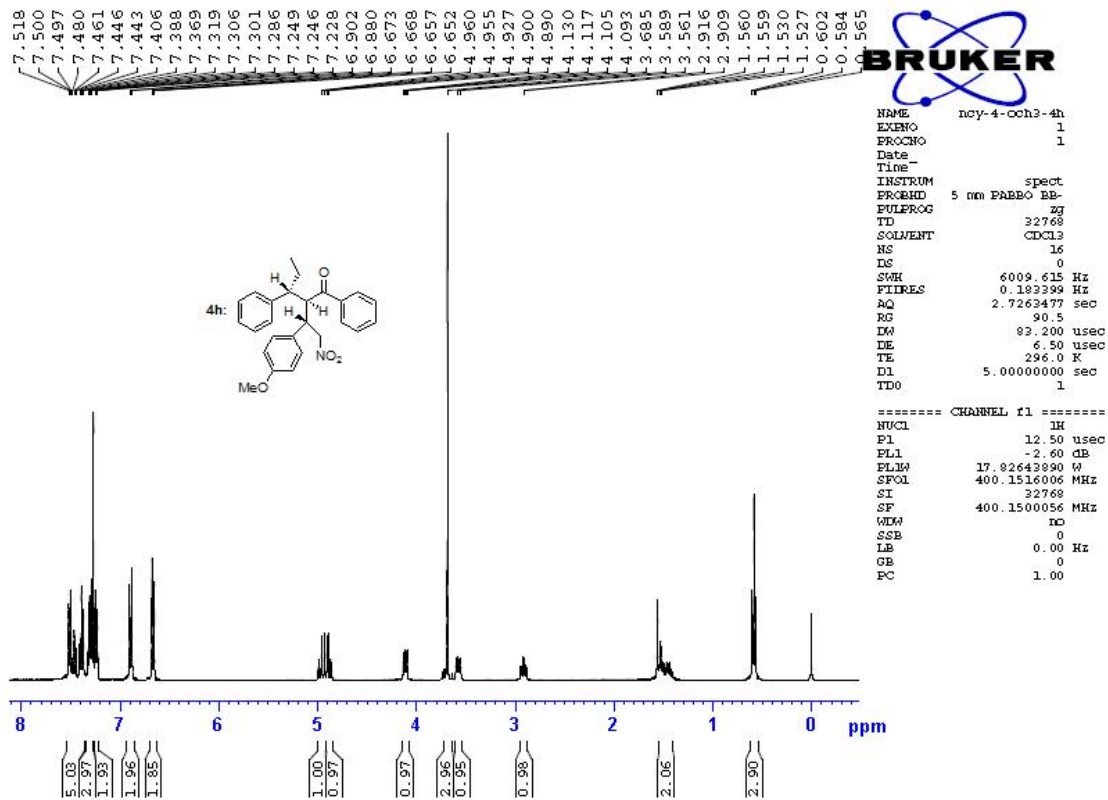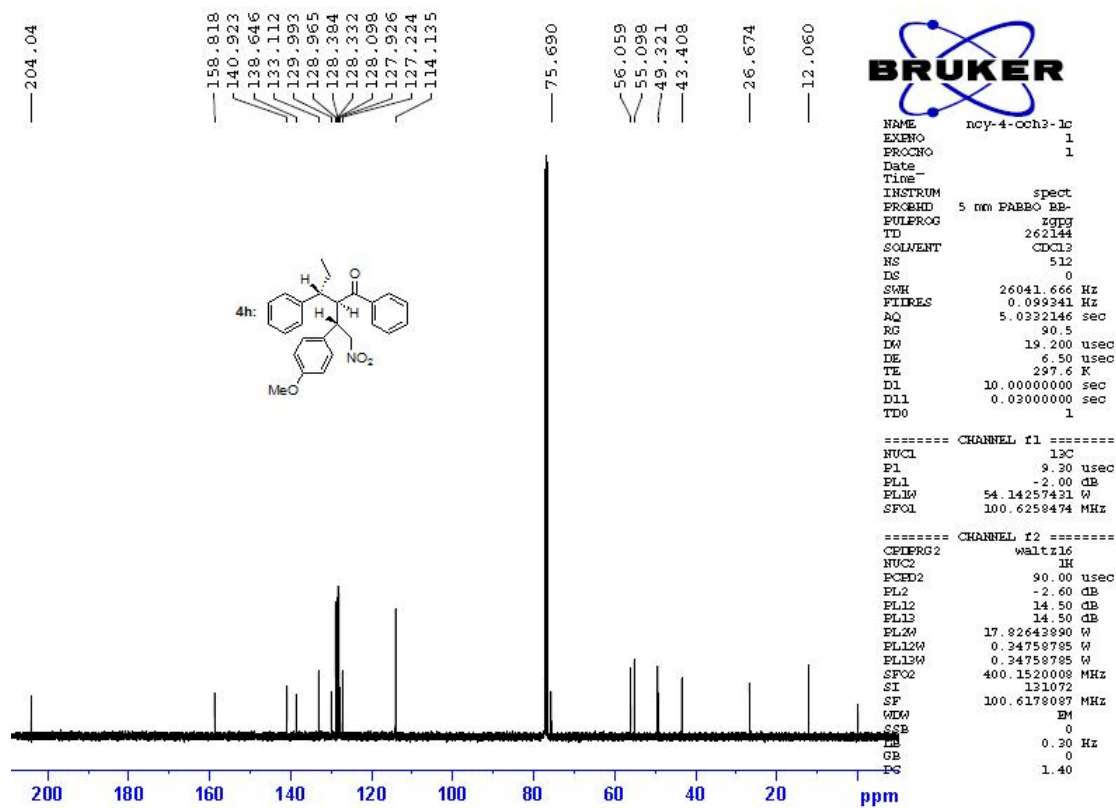

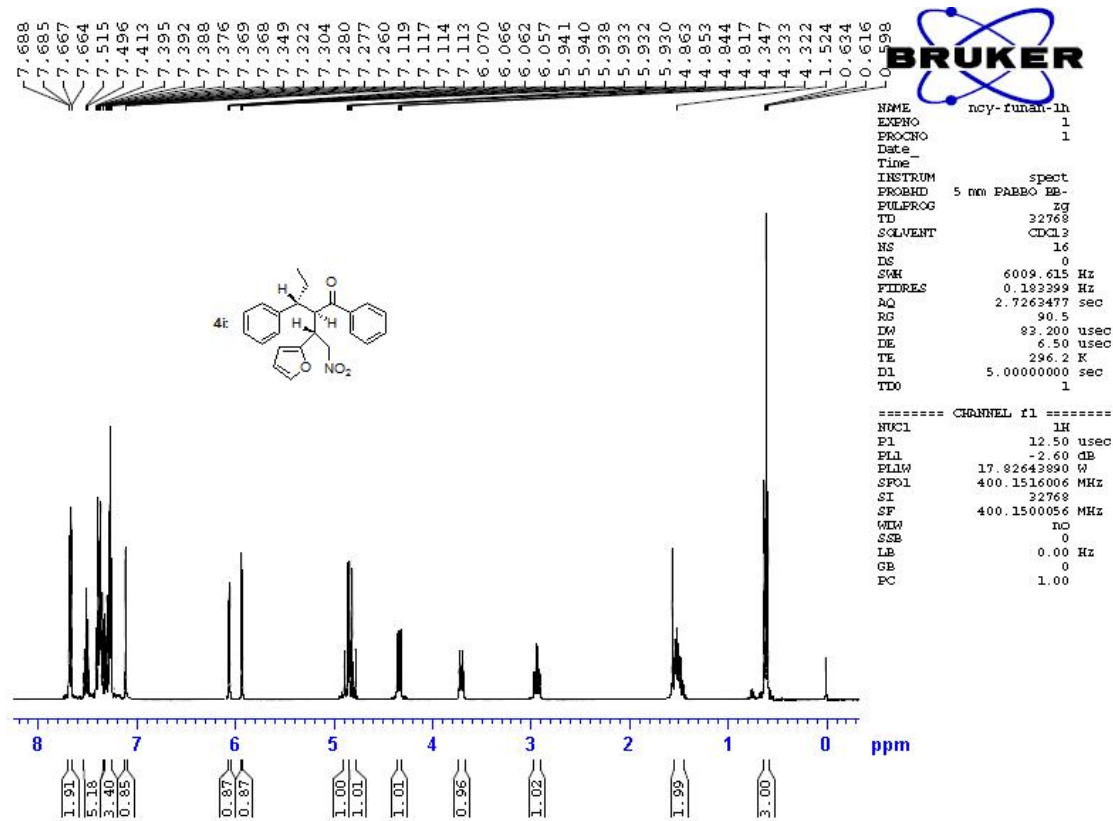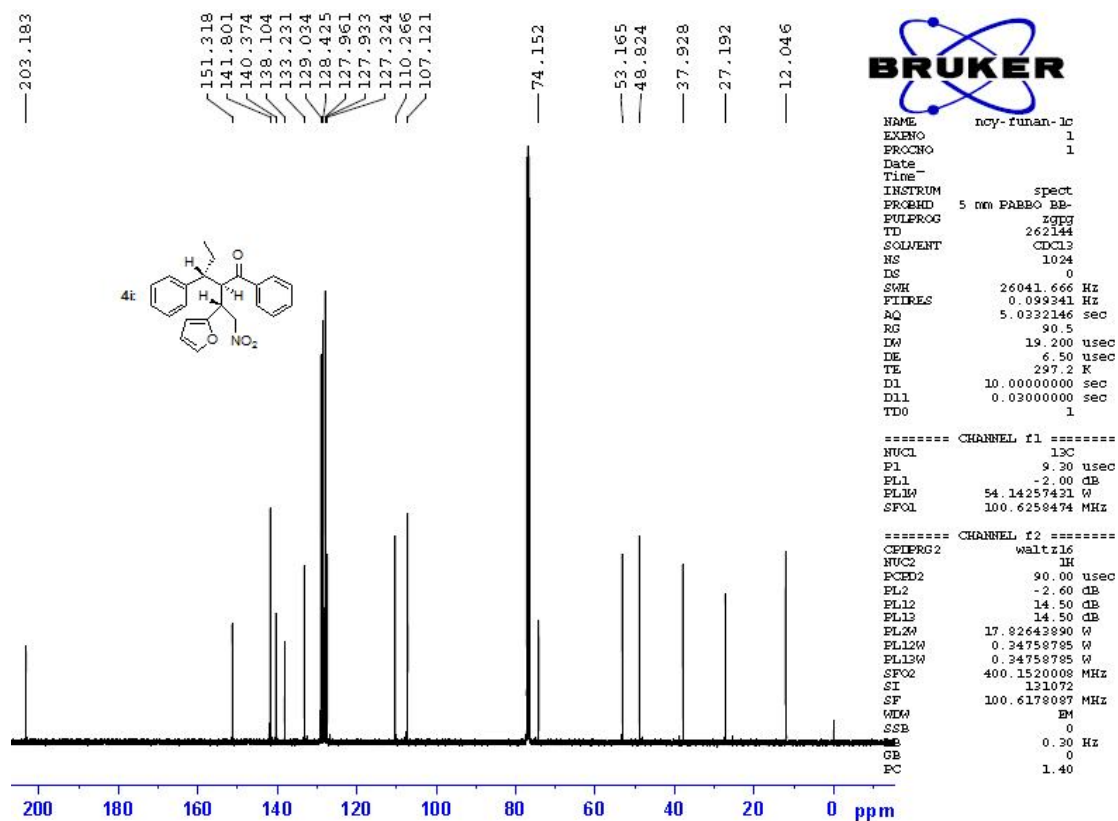

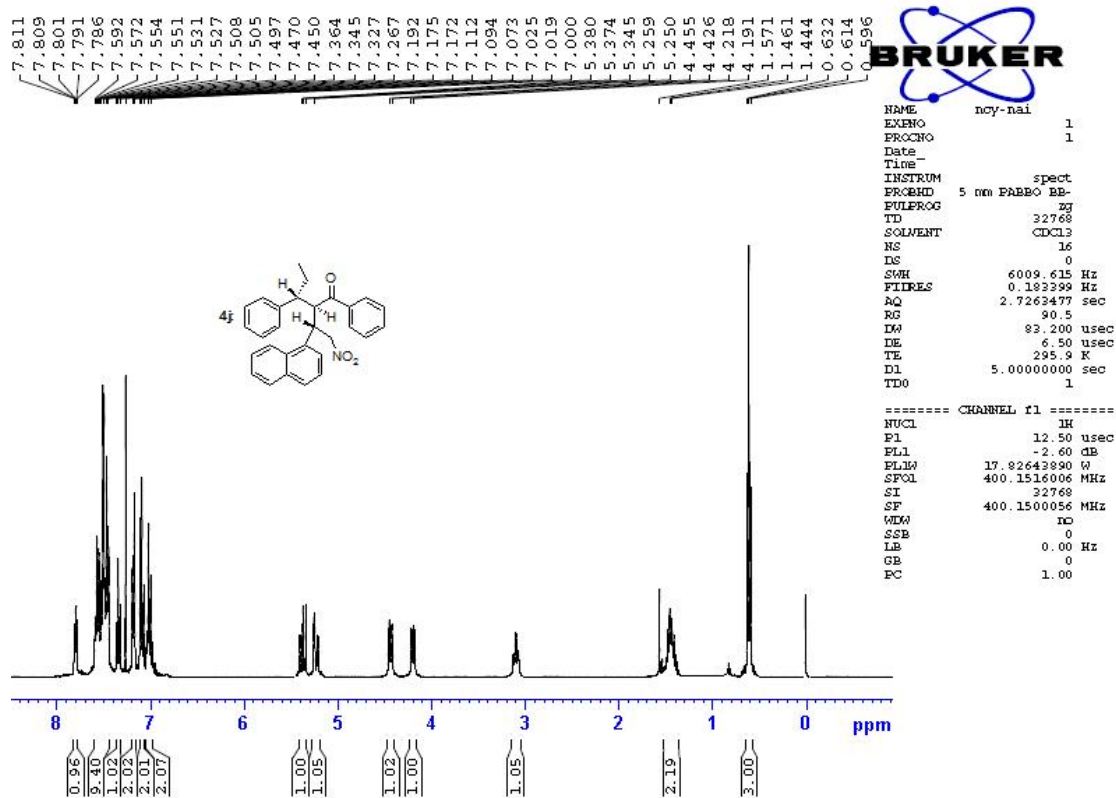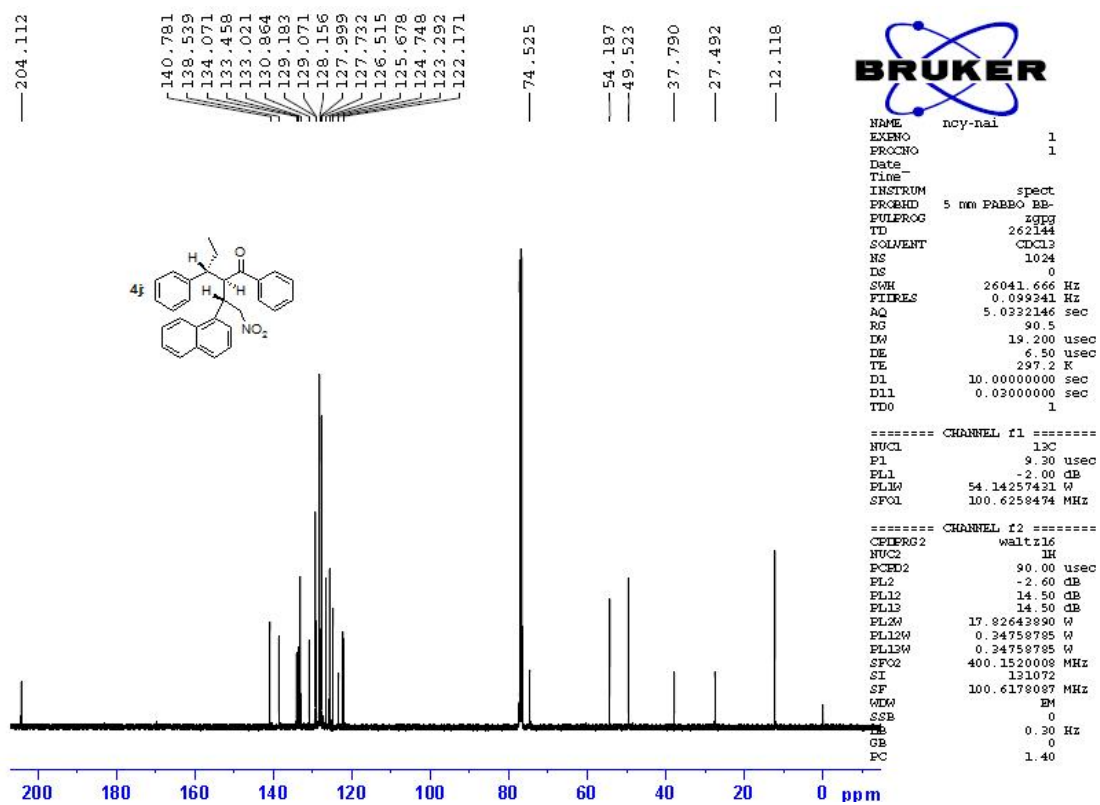



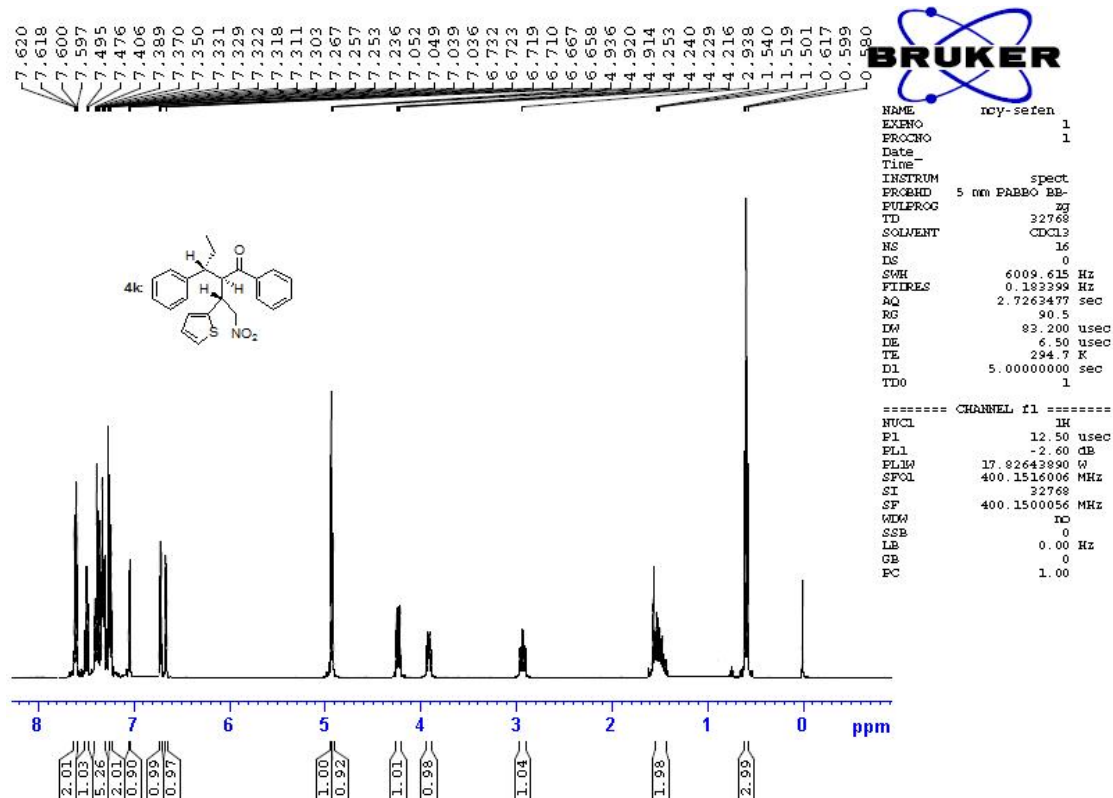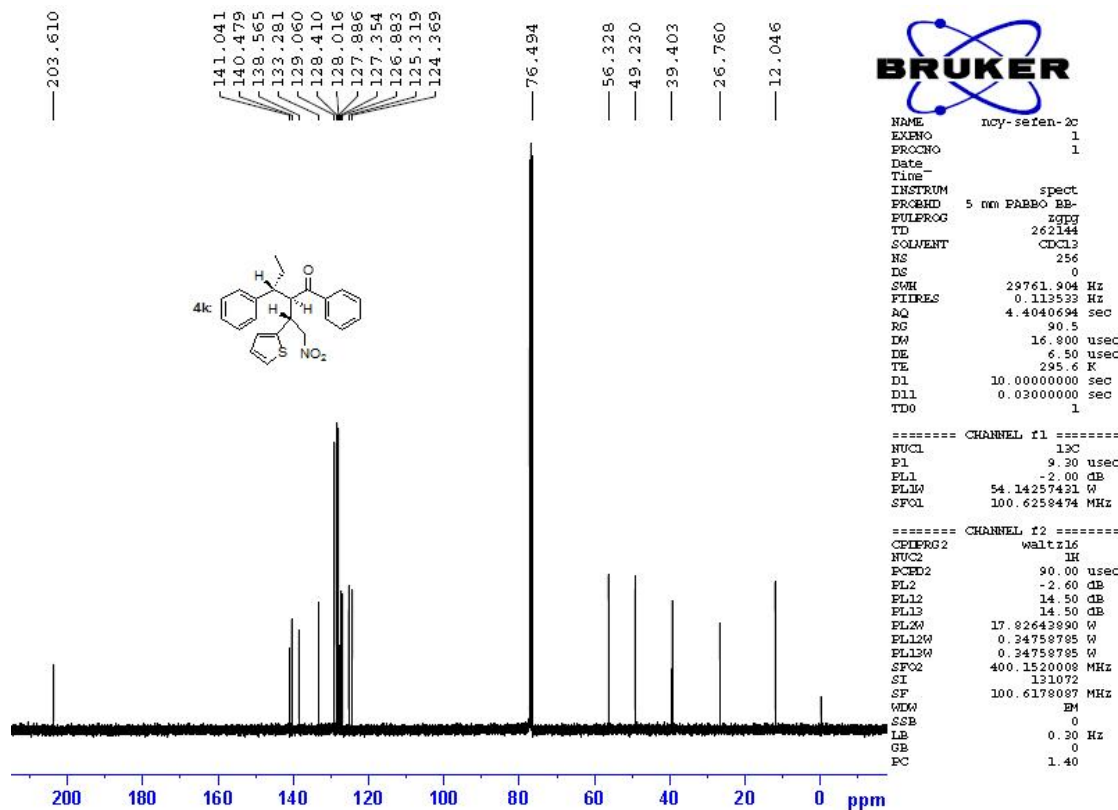

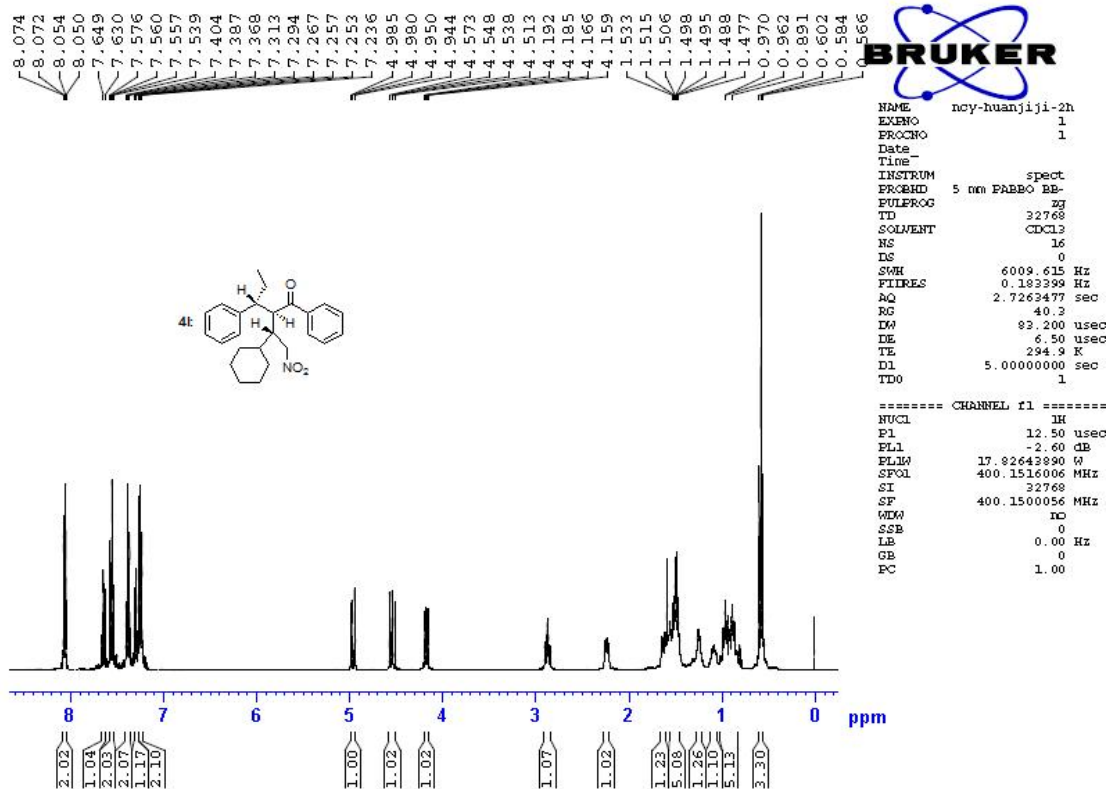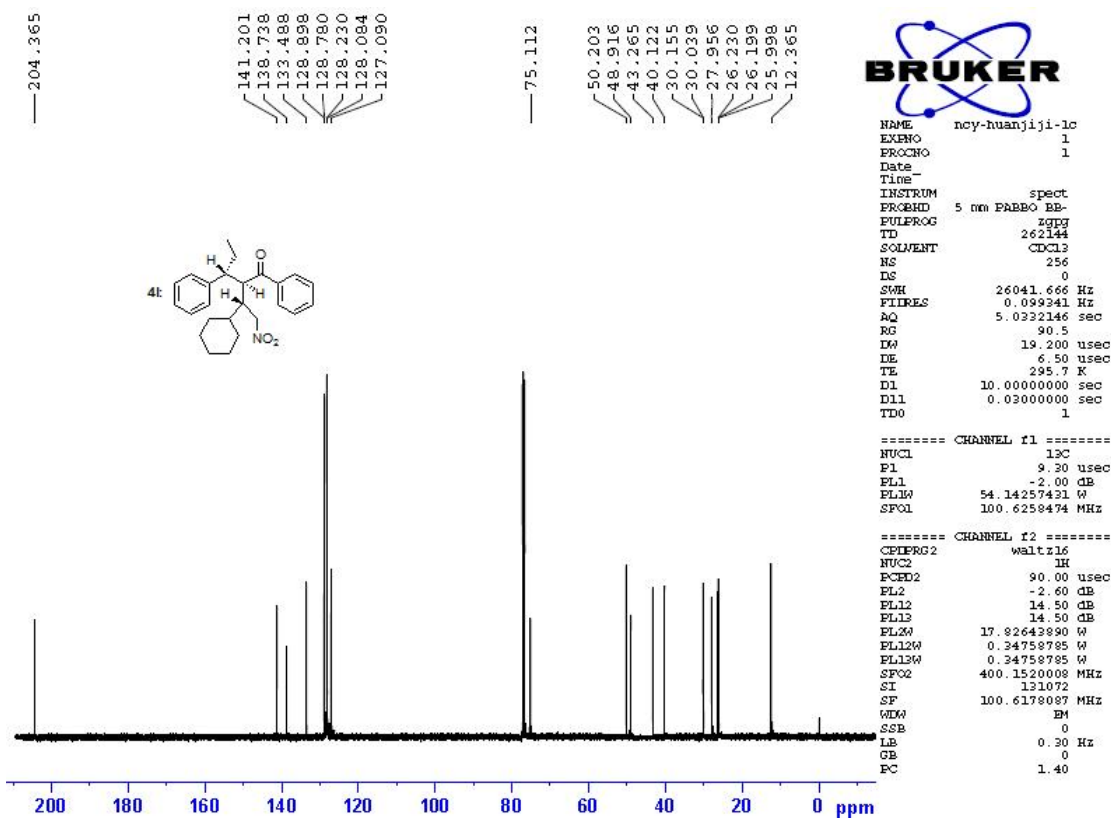

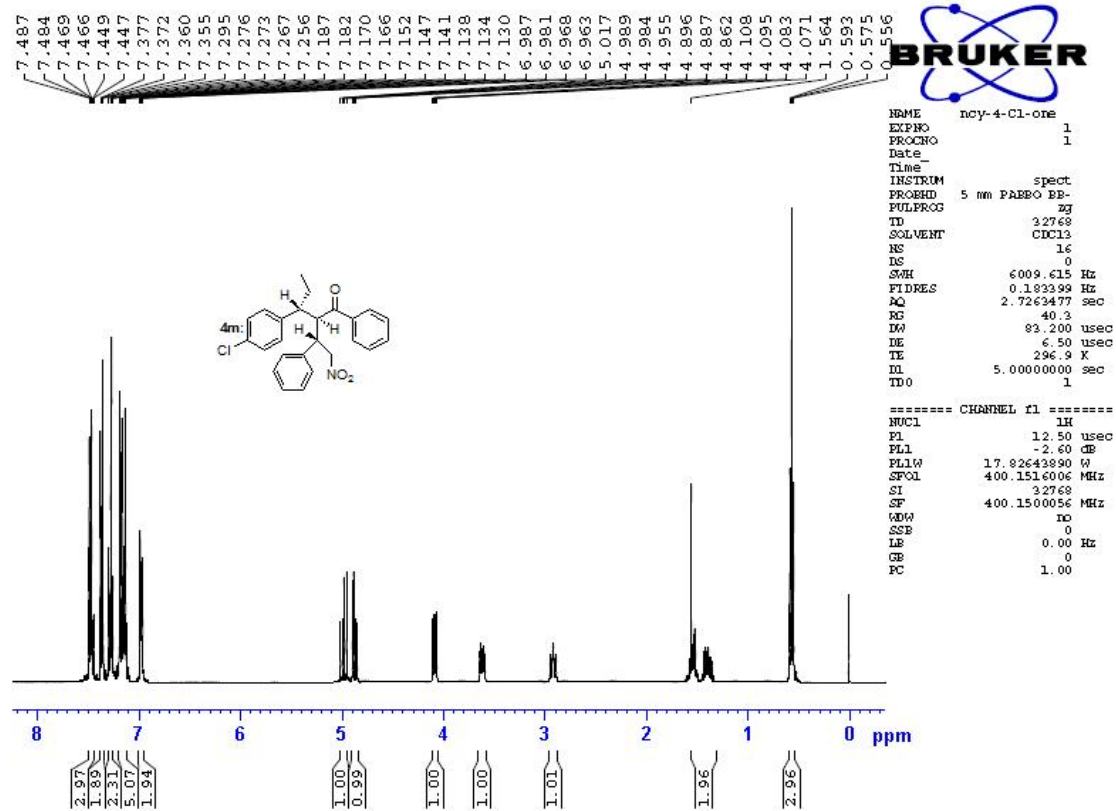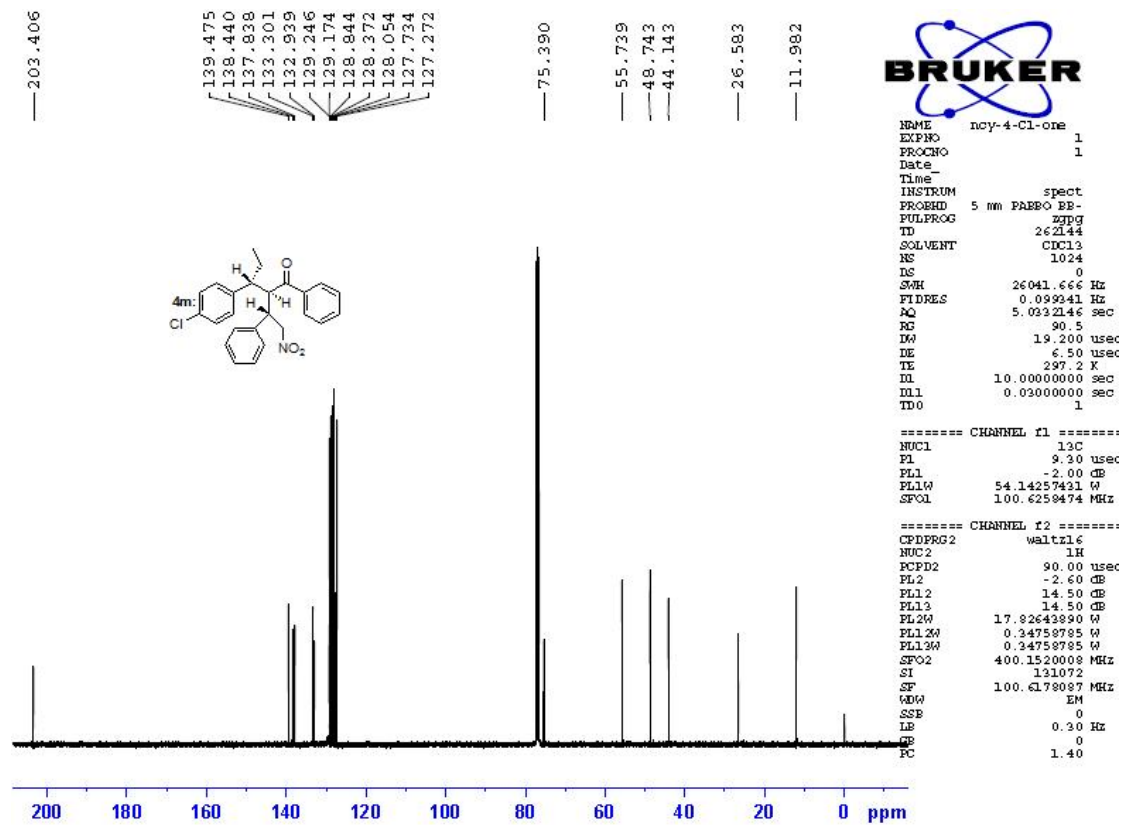

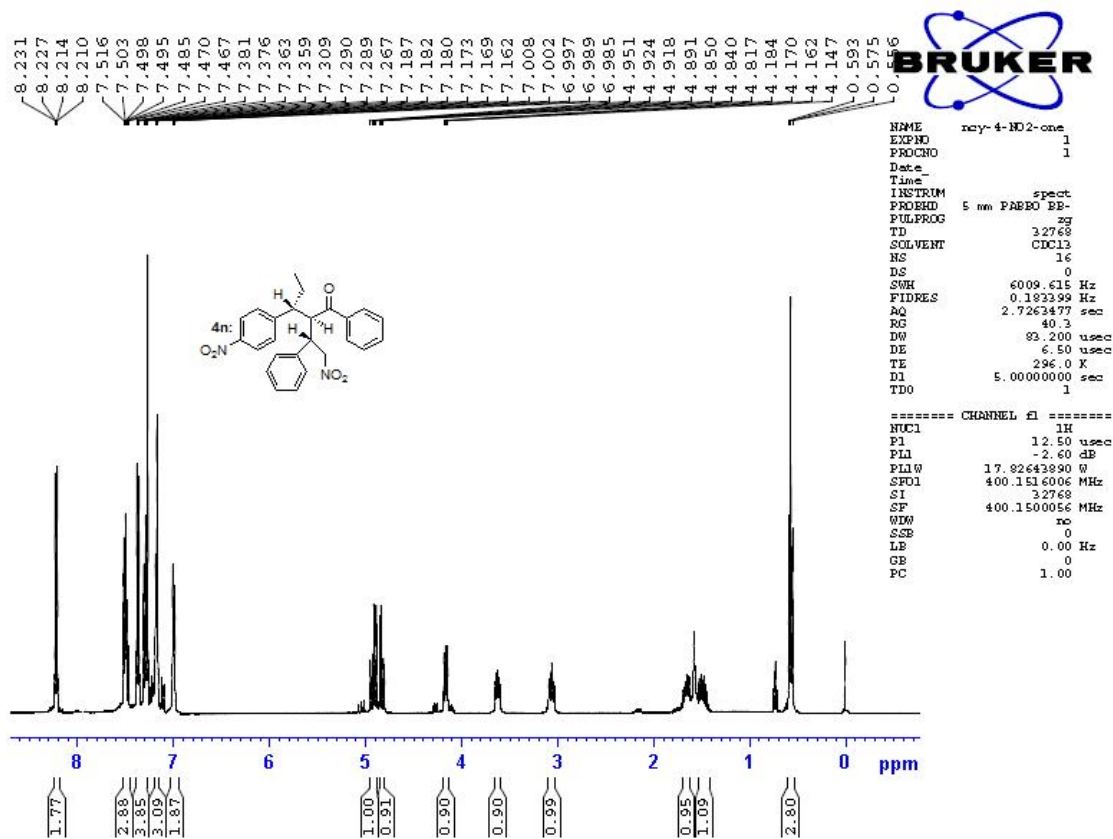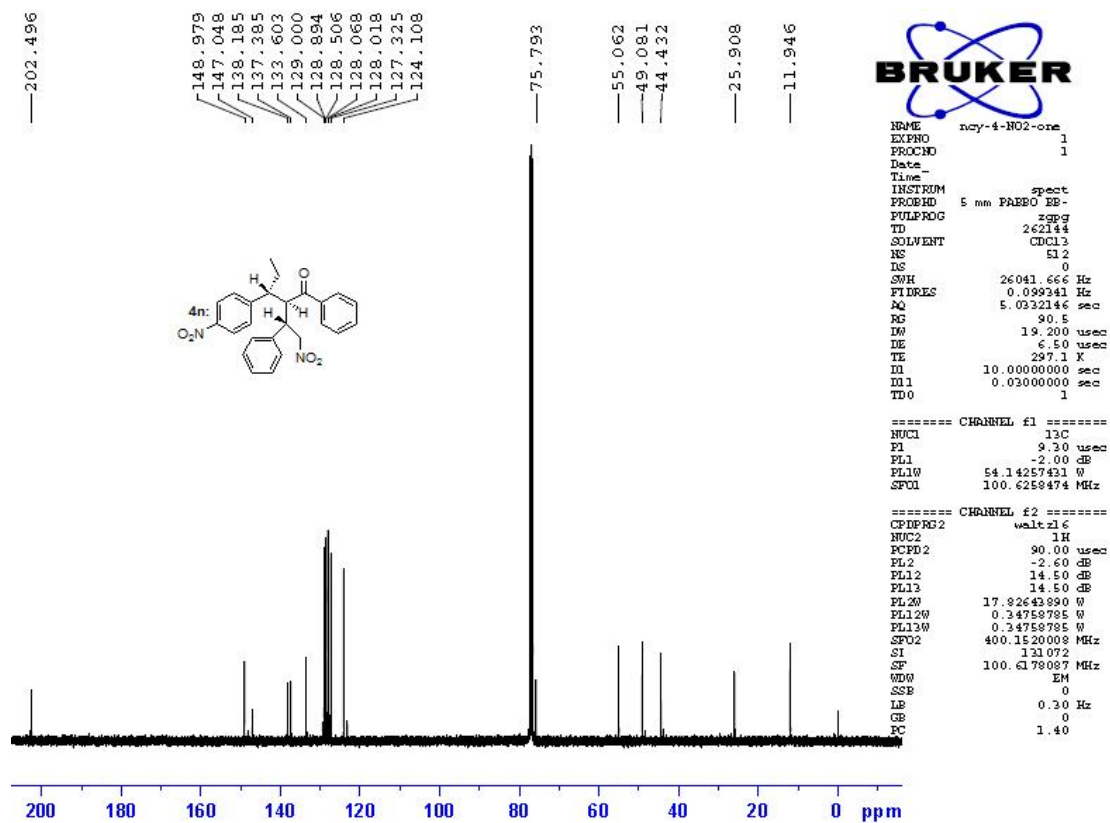

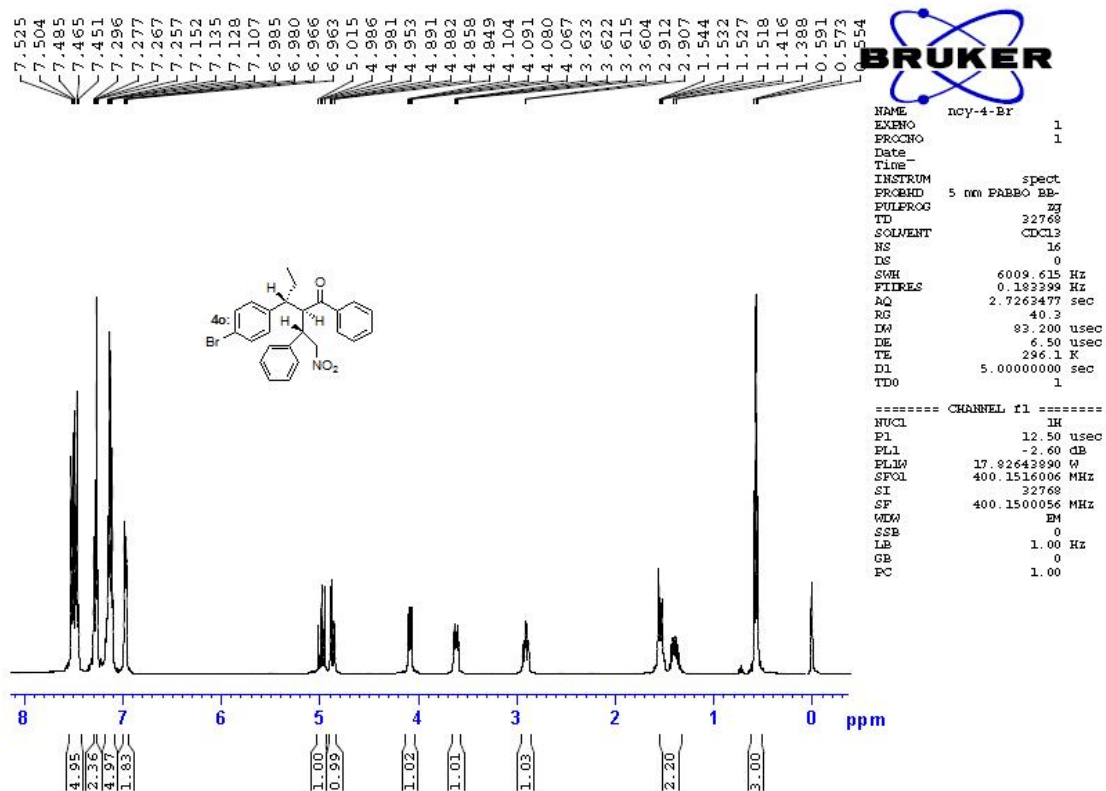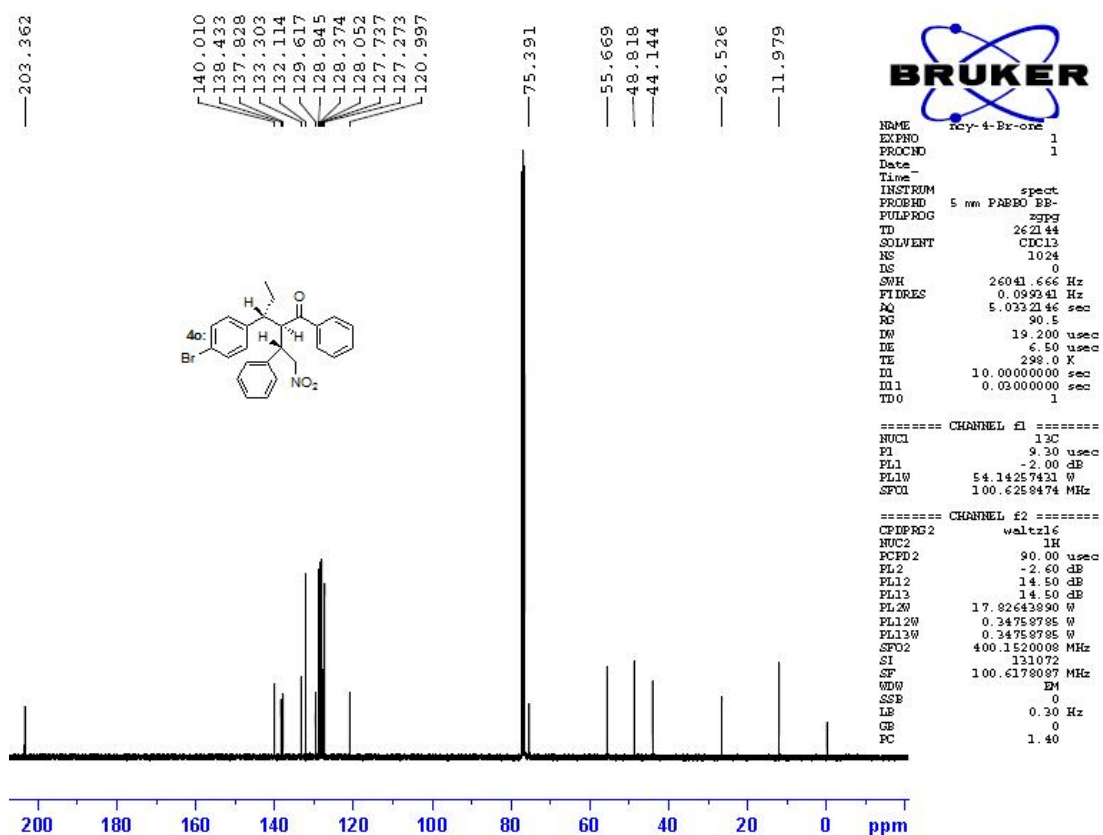



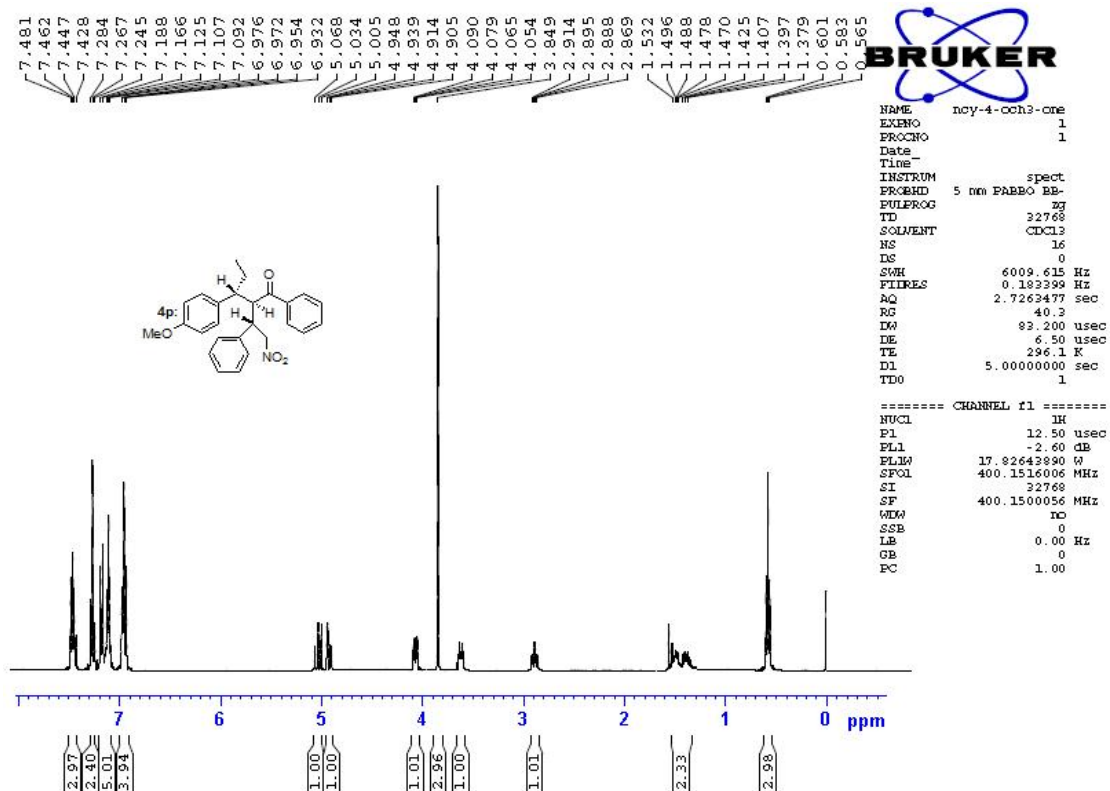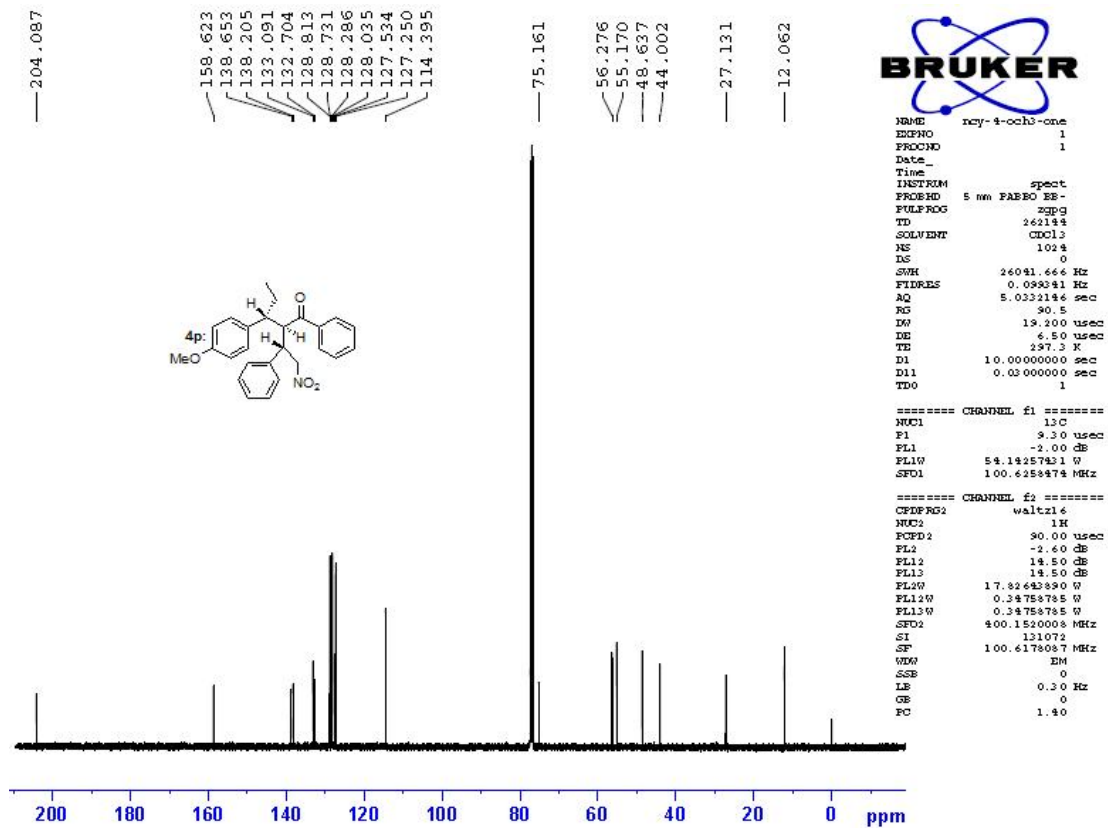

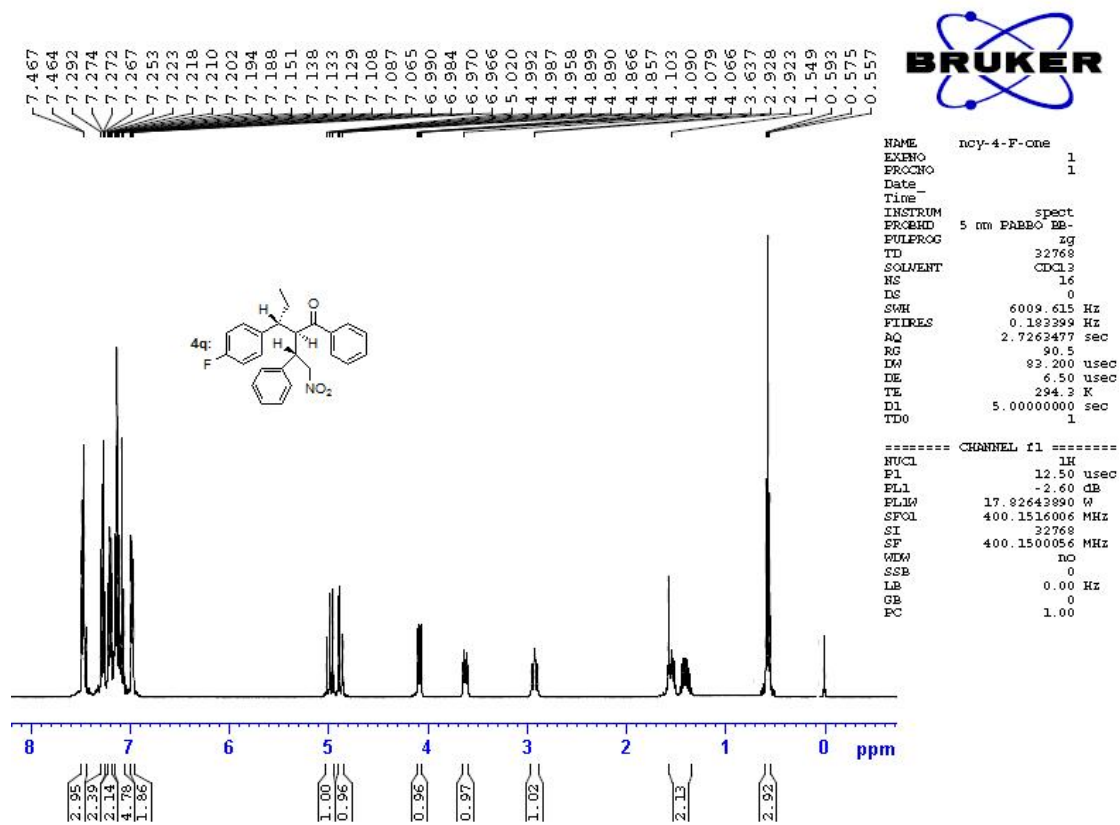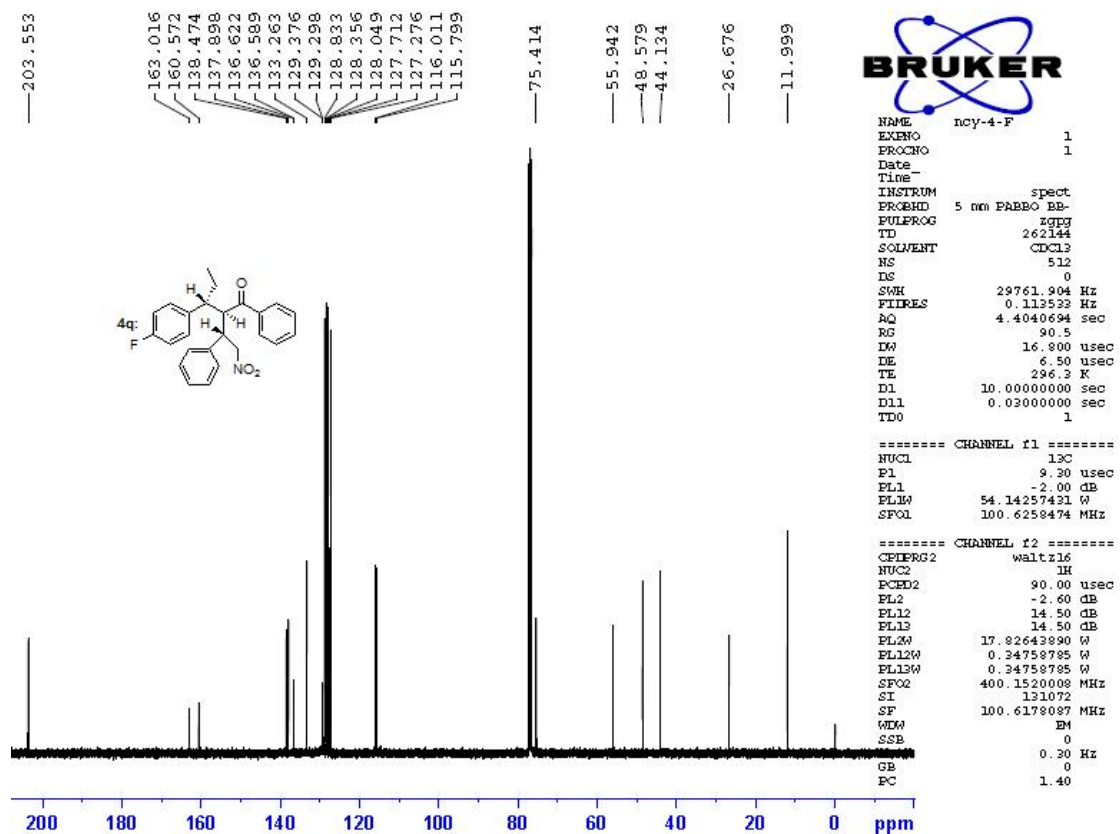

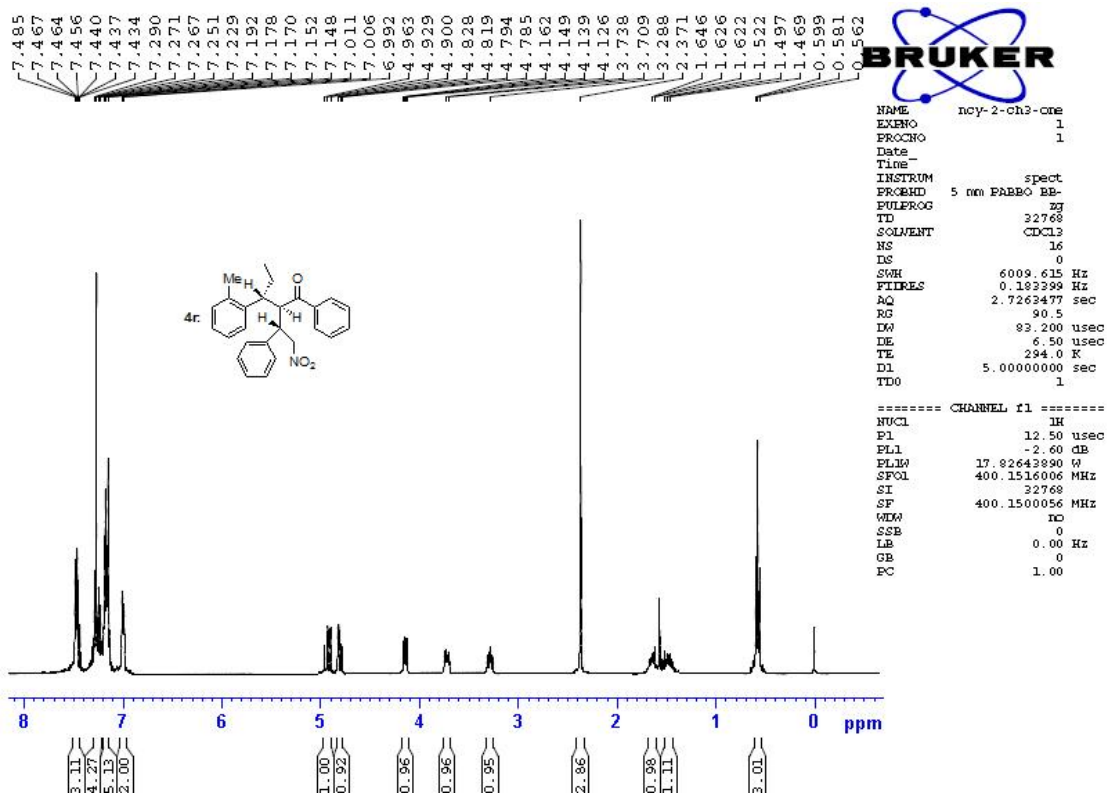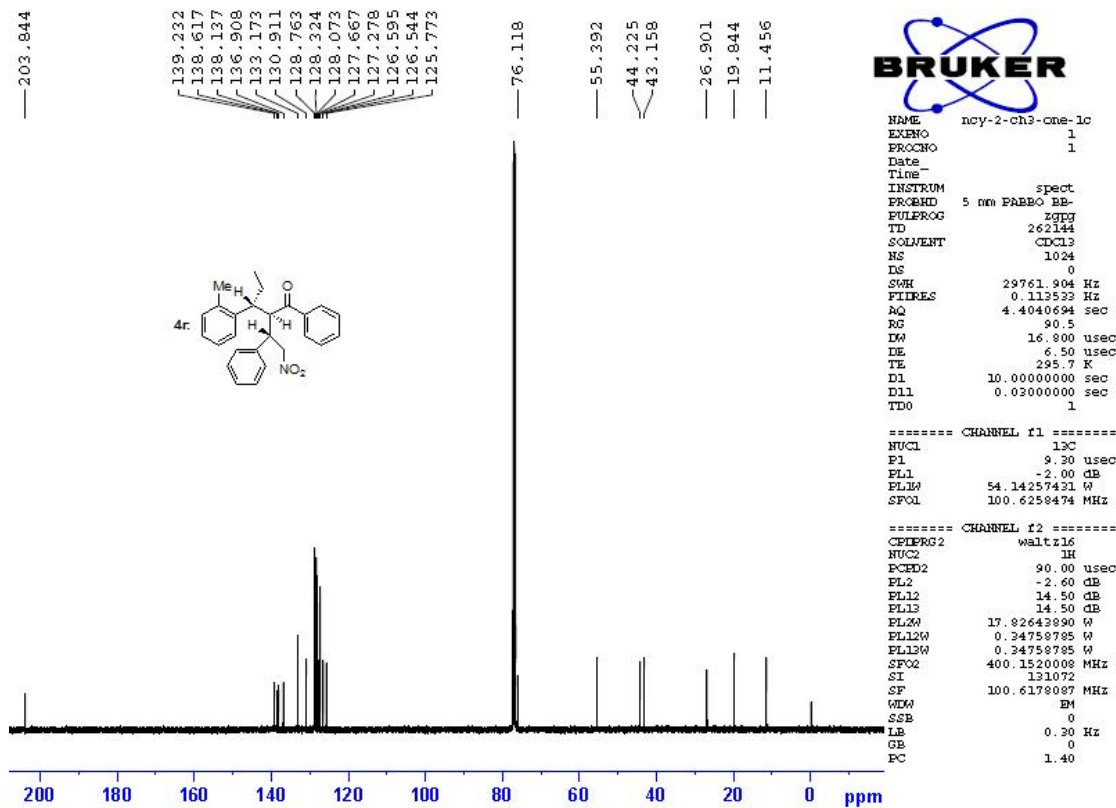



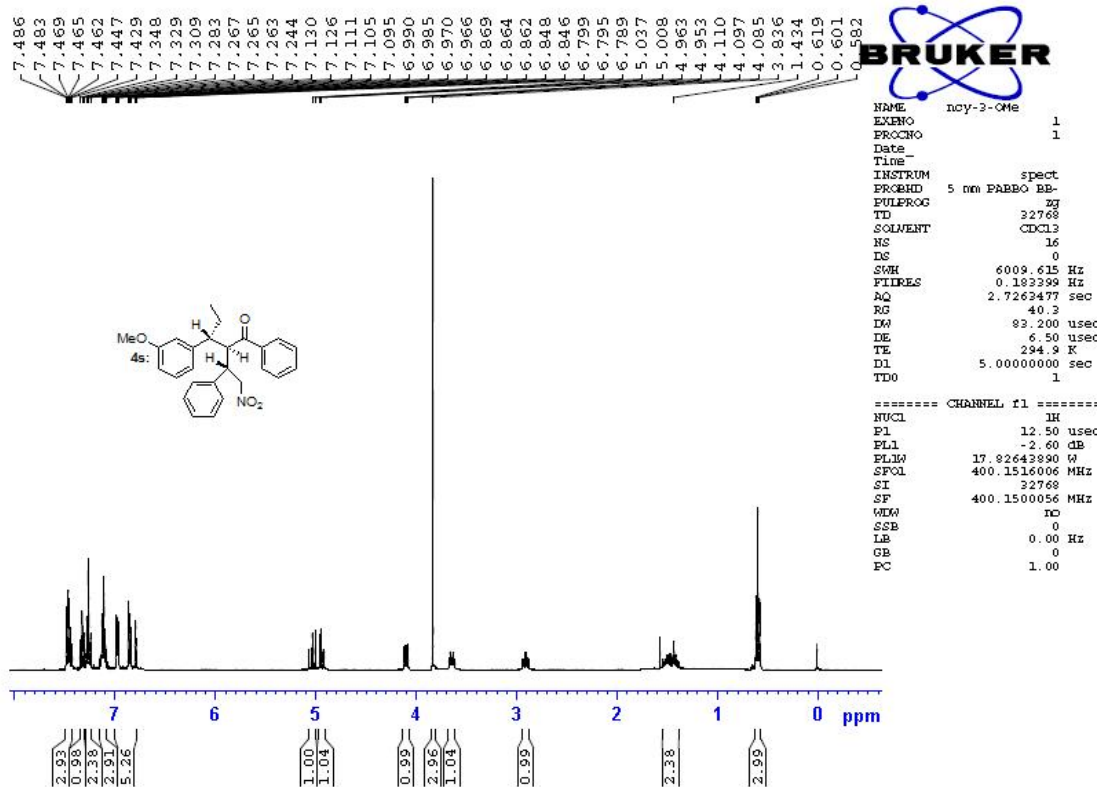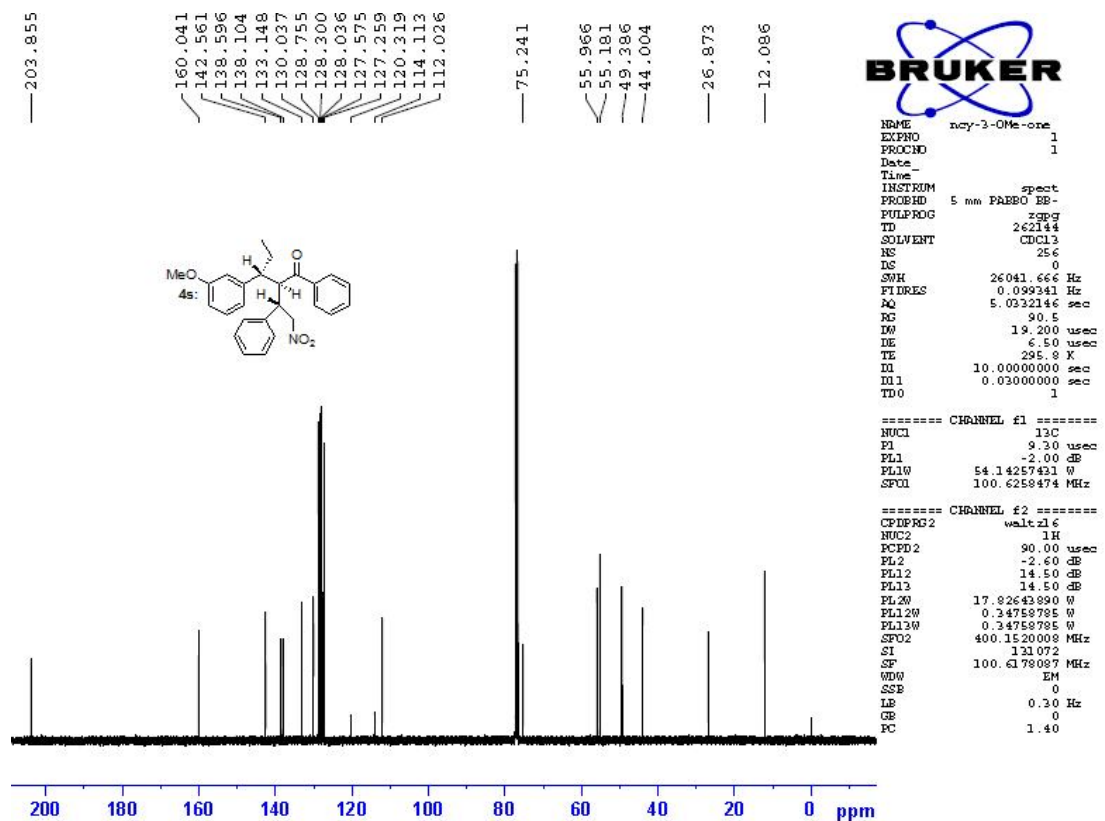

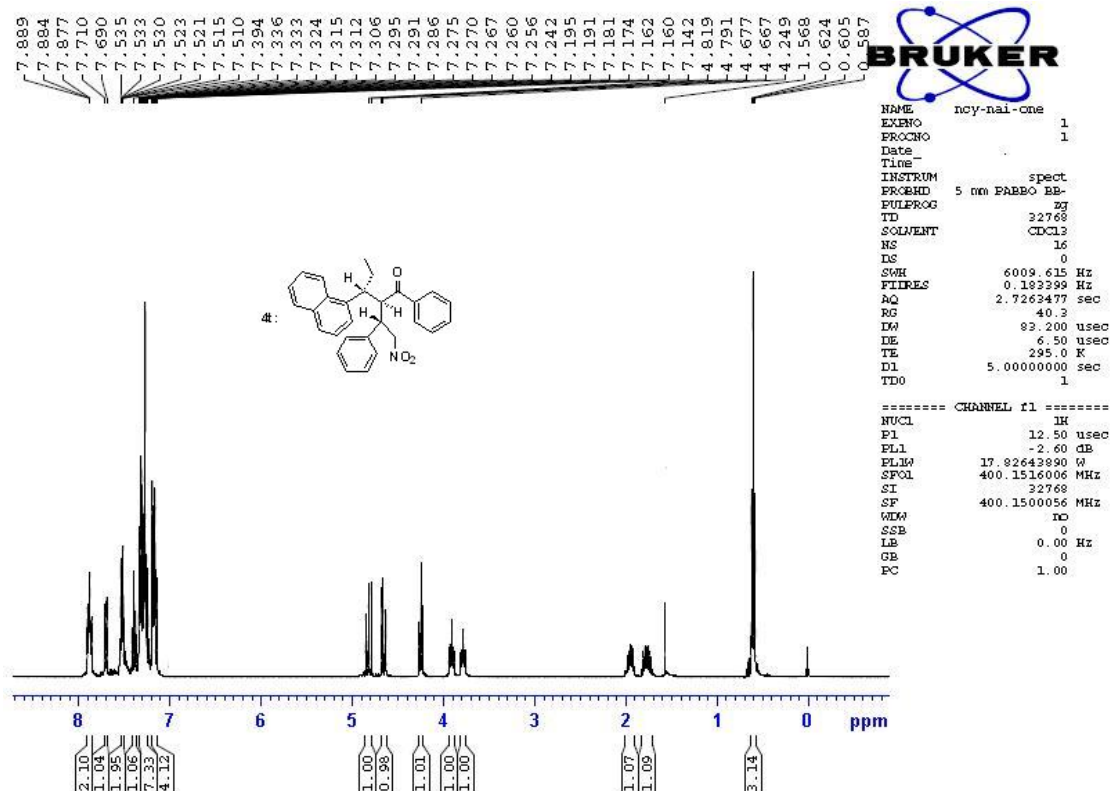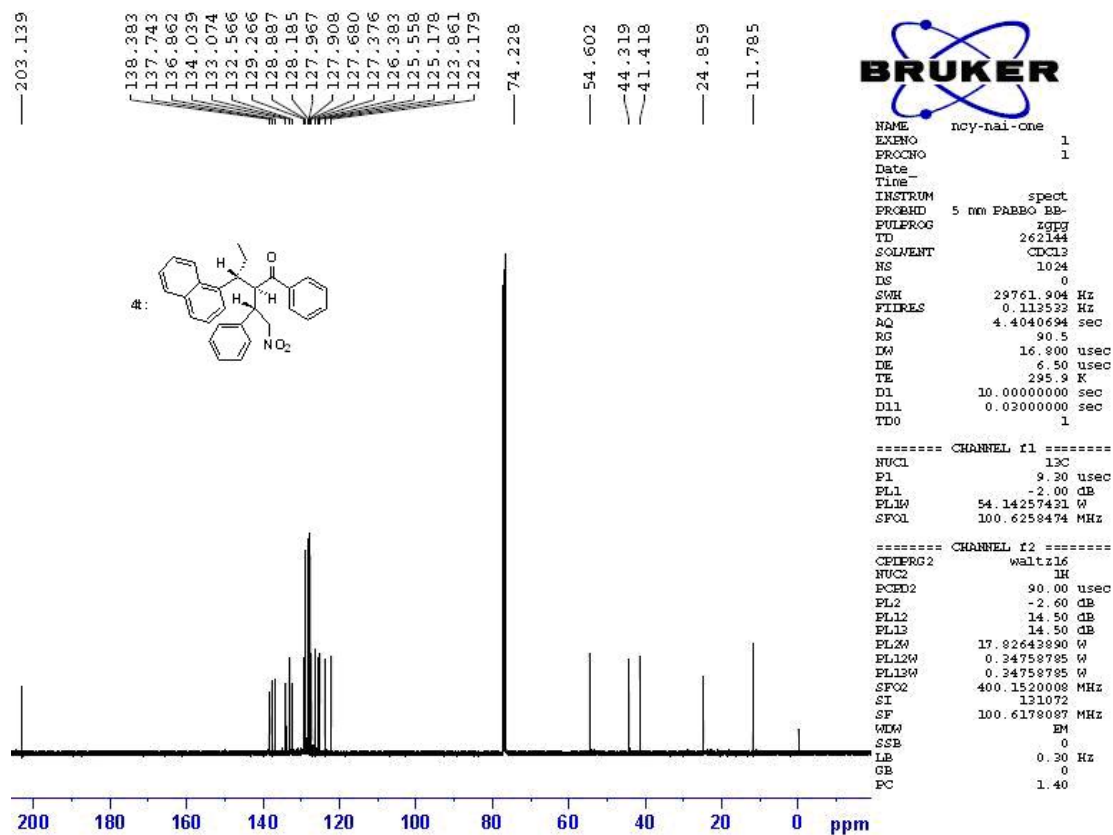

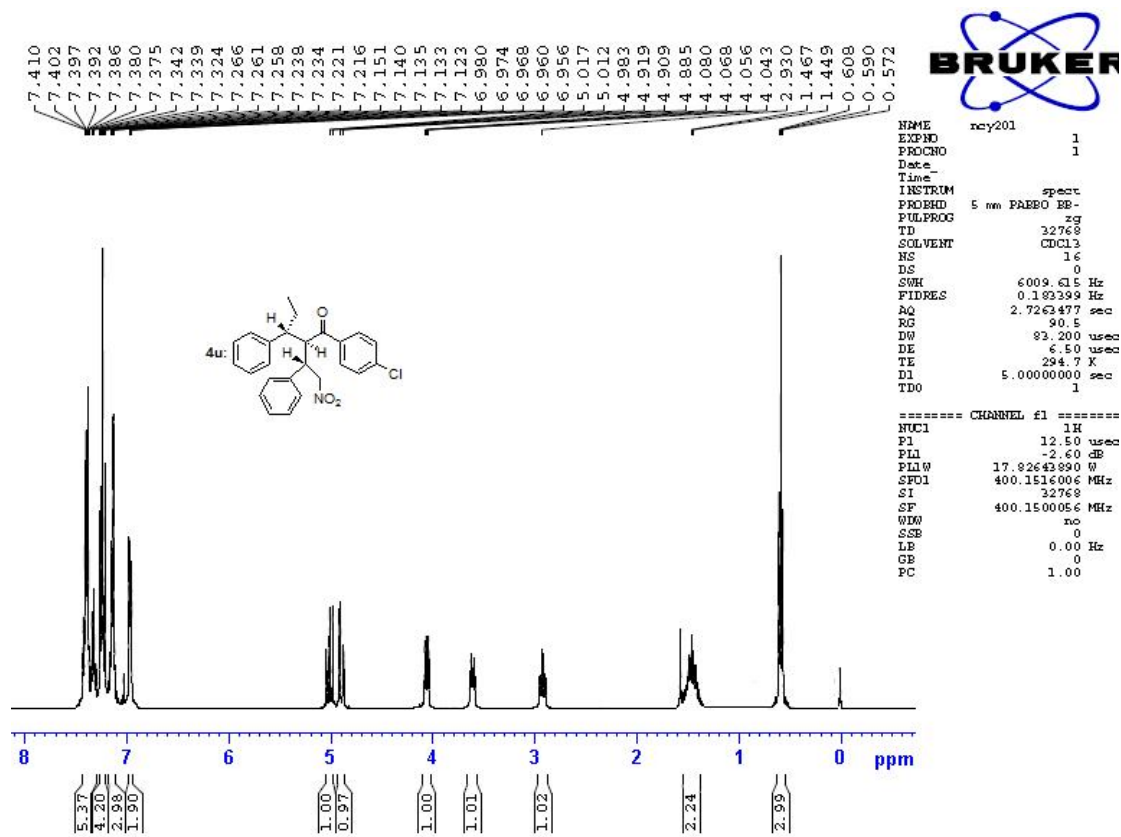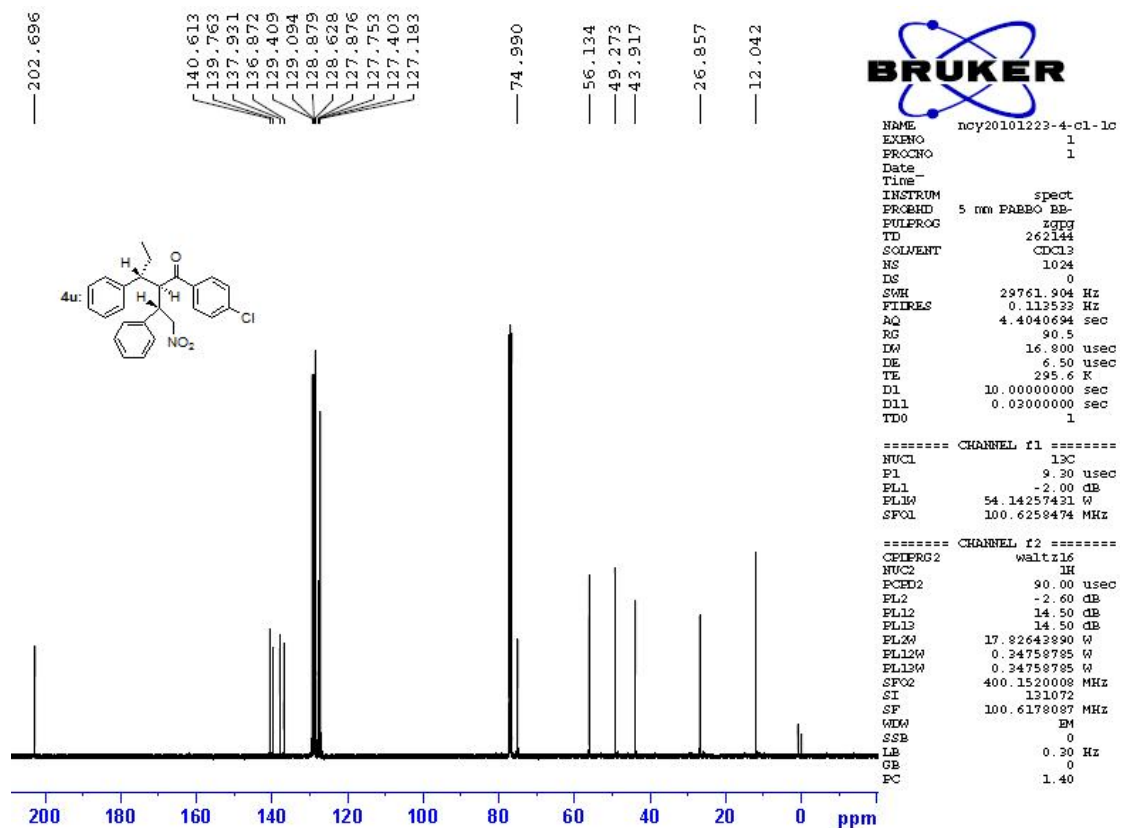

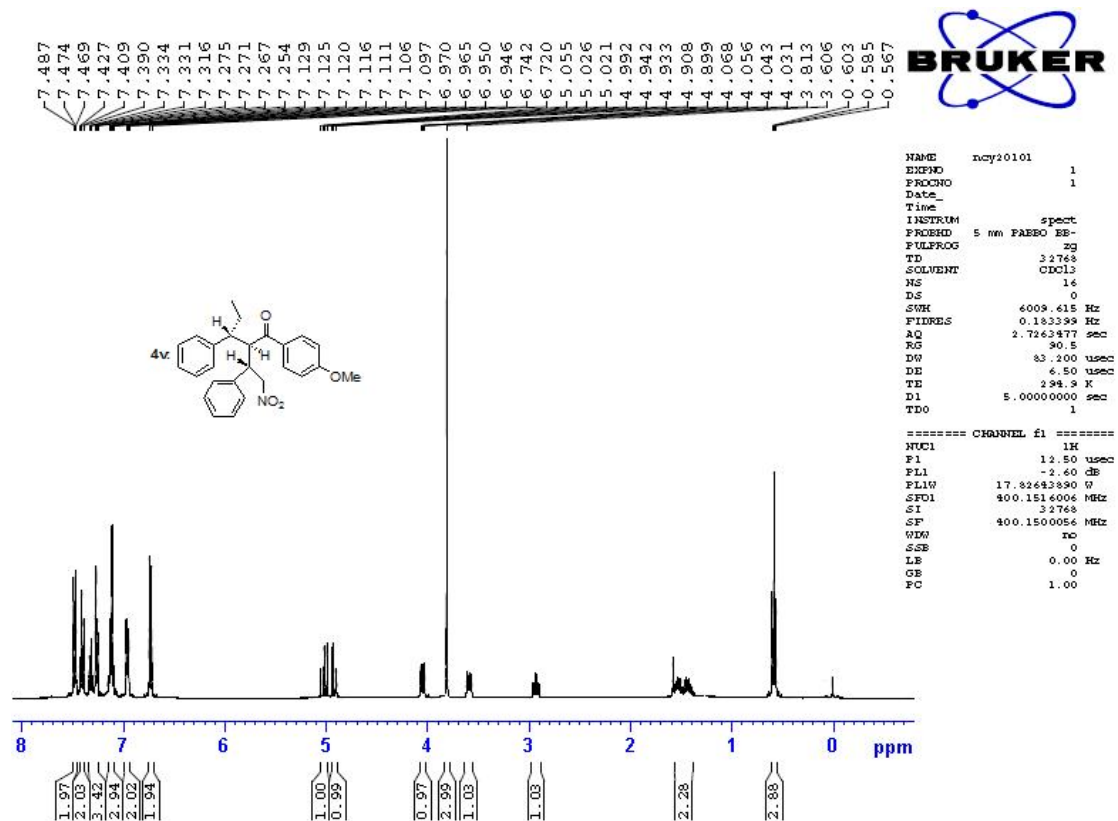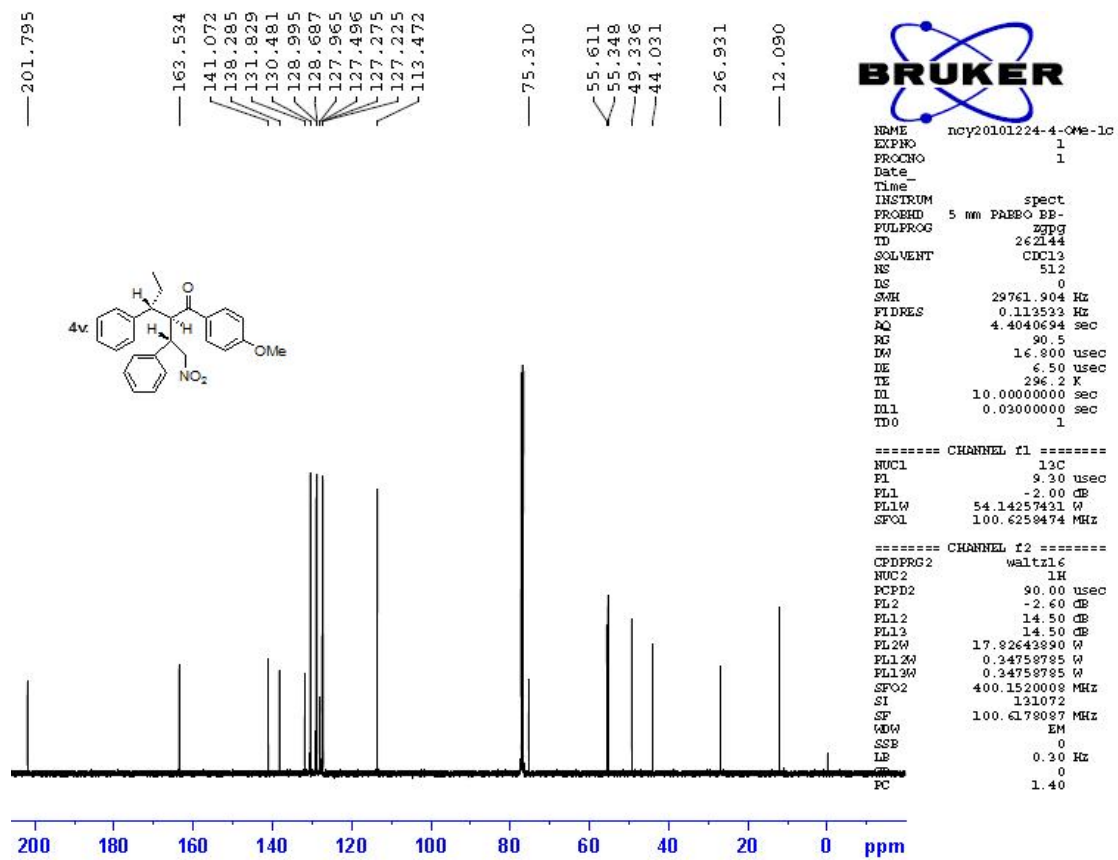

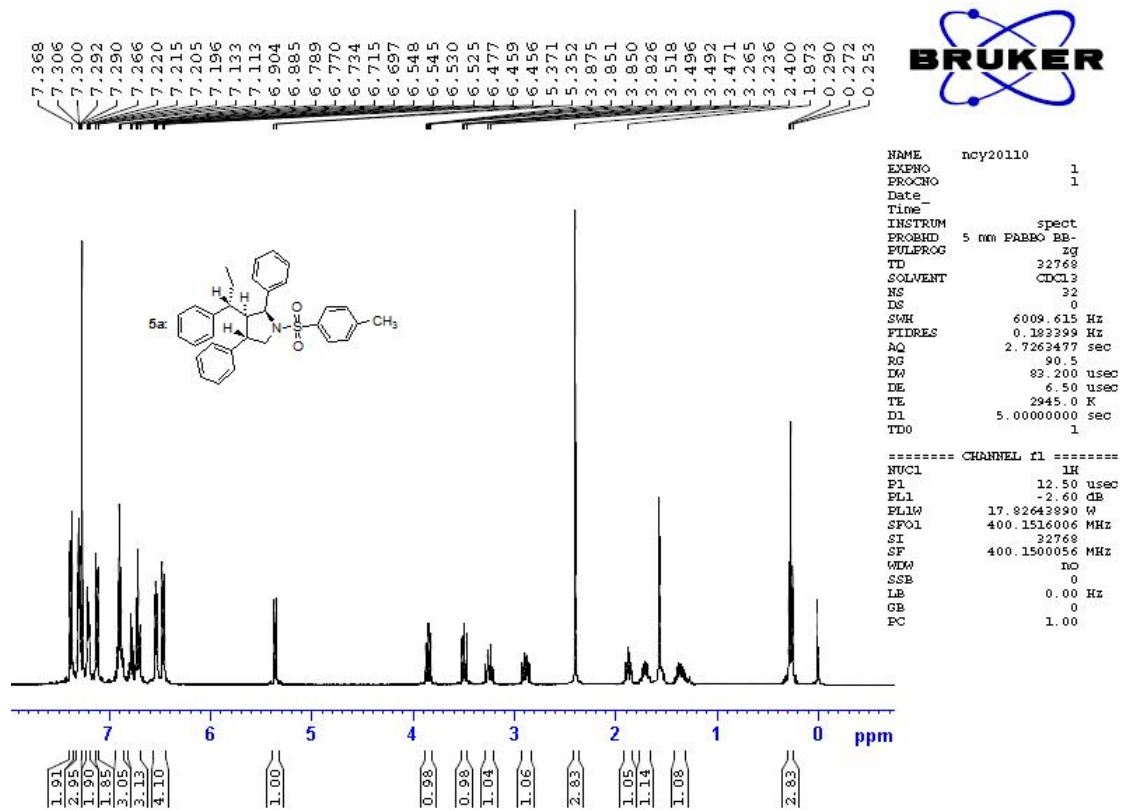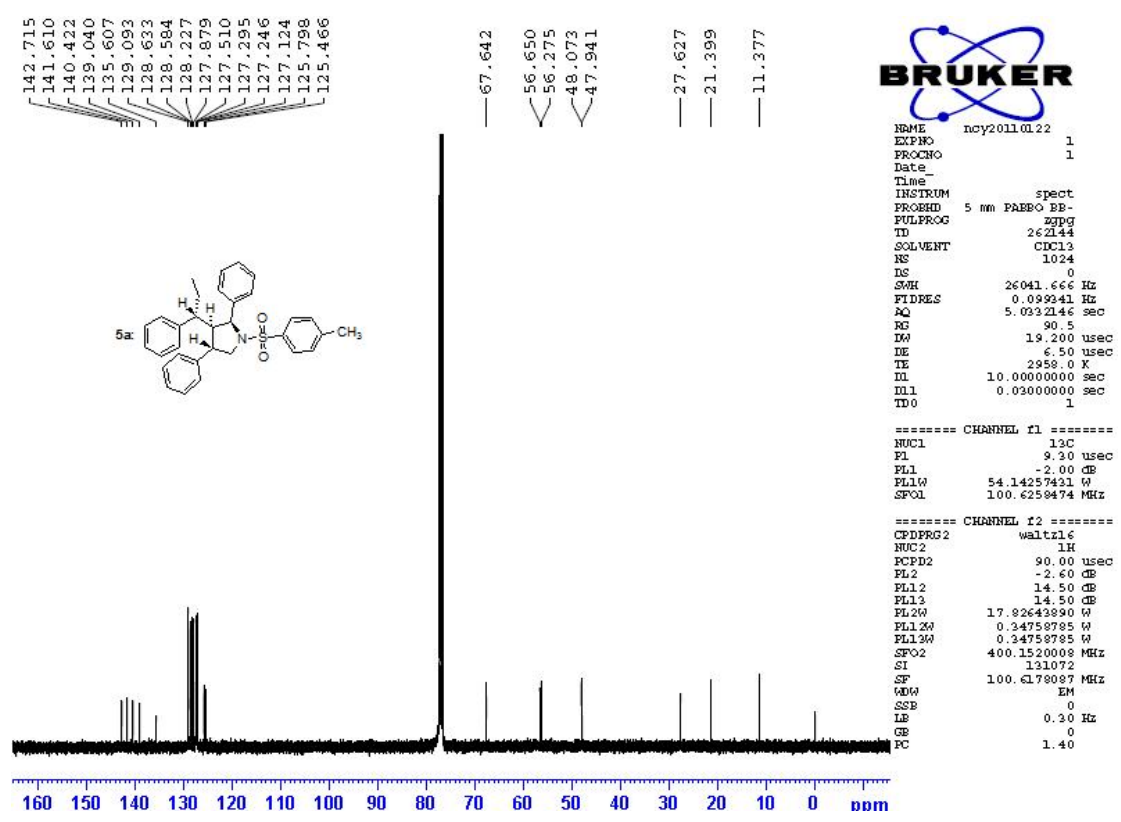



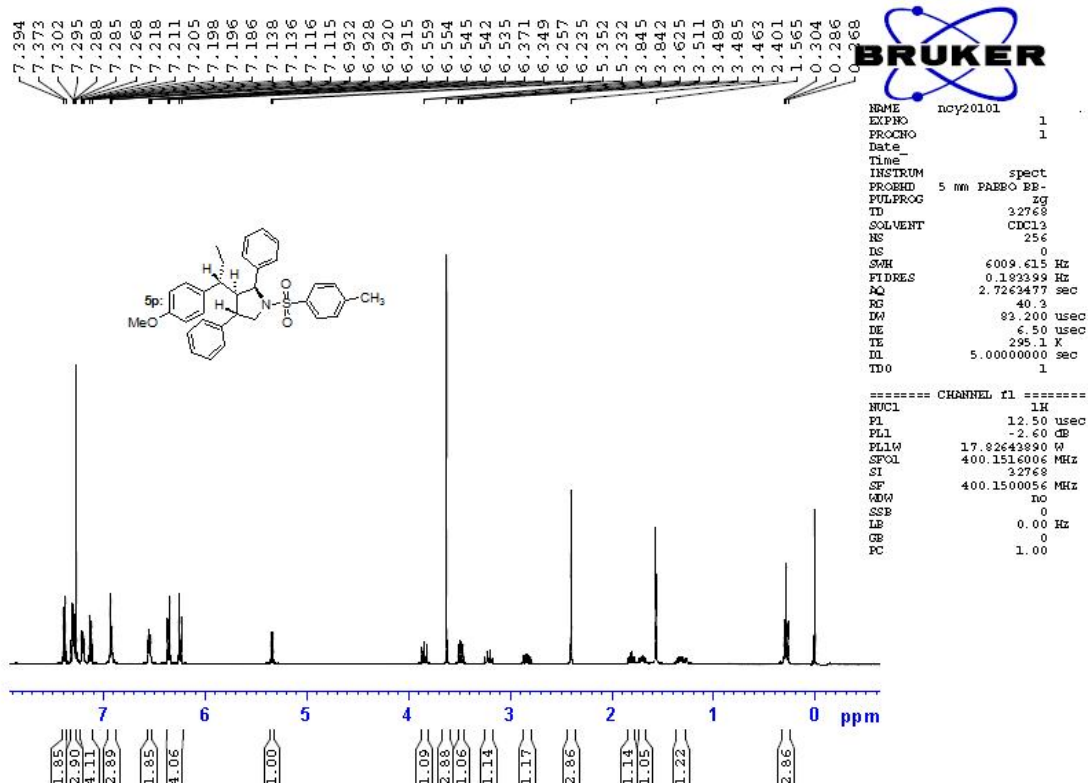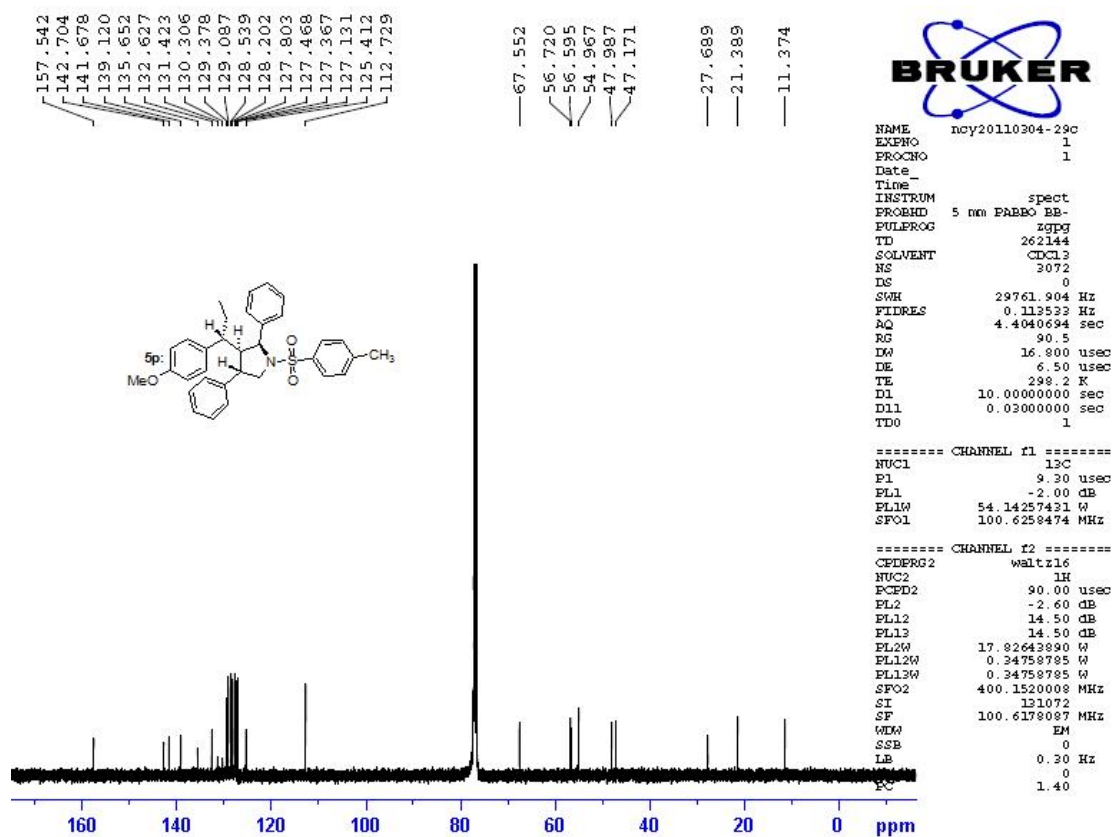

## HPLC spectra for compounds 4a-v, 5a, 5p

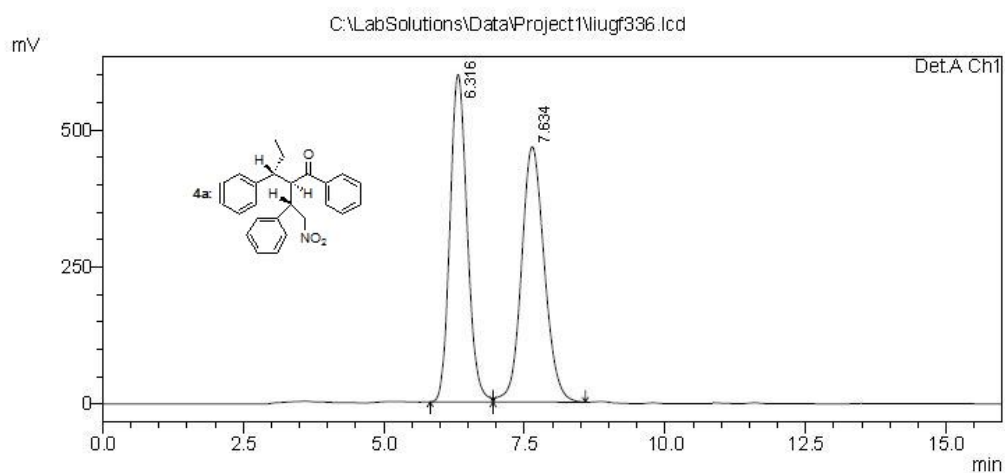

PeakTable

| Peak# | Ret. Time | Area     | Height  | Area %  |
|-------|-----------|----------|---------|---------|
| 1     | 6.316     | 12703790 | 597613  | 49.049  |
| 2     | 7.634     | 13196419 | 466159  | 50.951  |
| Total |           | 25900209 | 1063771 | 100.000 |

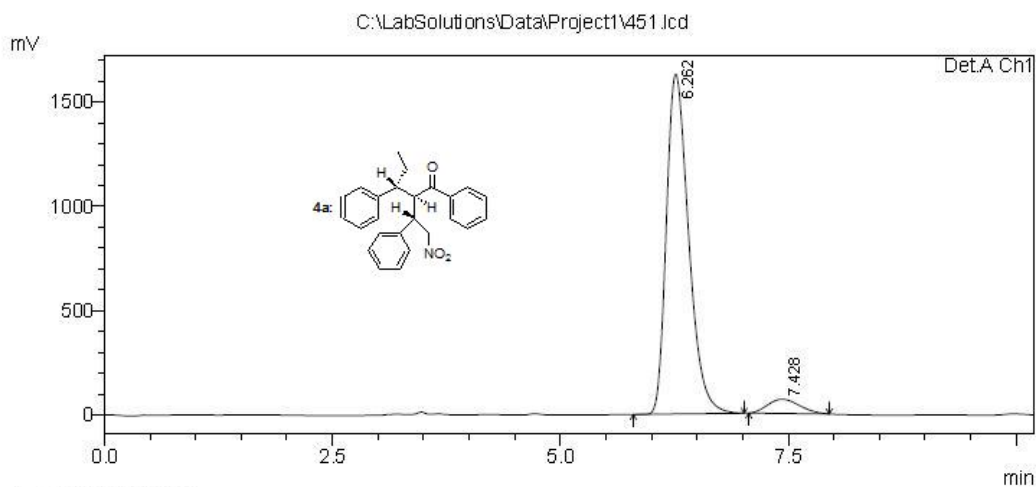

PeakTable

| Peak# | Ret. Time | Area     | Height  | Area %  |
|-------|-----------|----------|---------|---------|
| 1     | 6.262     | 27582640 | 1627588 | 94.315  |
| 2     | 7.428     | 1662524  | 67958   | 5.685   |
| Total |           | 29245164 | 1695546 | 100.000 |

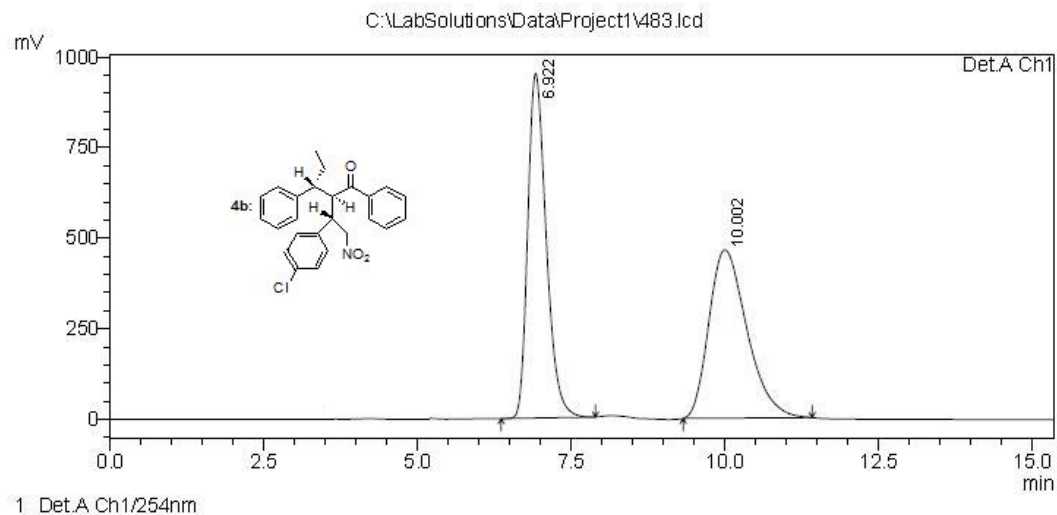

PeakTable

| Peak# | Ret. Time | Area     | Height  | Area %  |
|-------|-----------|----------|---------|---------|
| 1     | 6.922     | 19829186 | 950781  | 49.794  |
| 2     | 10.002    | 19992956 | 464422  | 50.206  |
| Total |           | 39822142 | 1415203 | 100.000 |

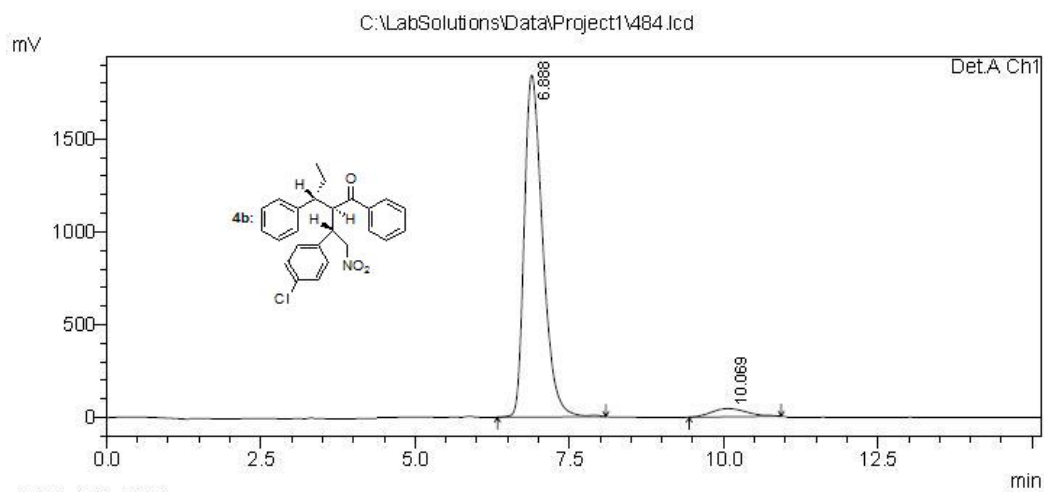

PeakTable

| Peak# | Ret. Time | Area     | Height  | Area %  |
|-------|-----------|----------|---------|---------|
| 1     | 6.888     | 38252777 | 1841067 | 95.572  |
| 2     | 10.069    | 1772149  | 44228   | 4.428   |
| Total |           | 40024925 | 1885295 | 100.000 |



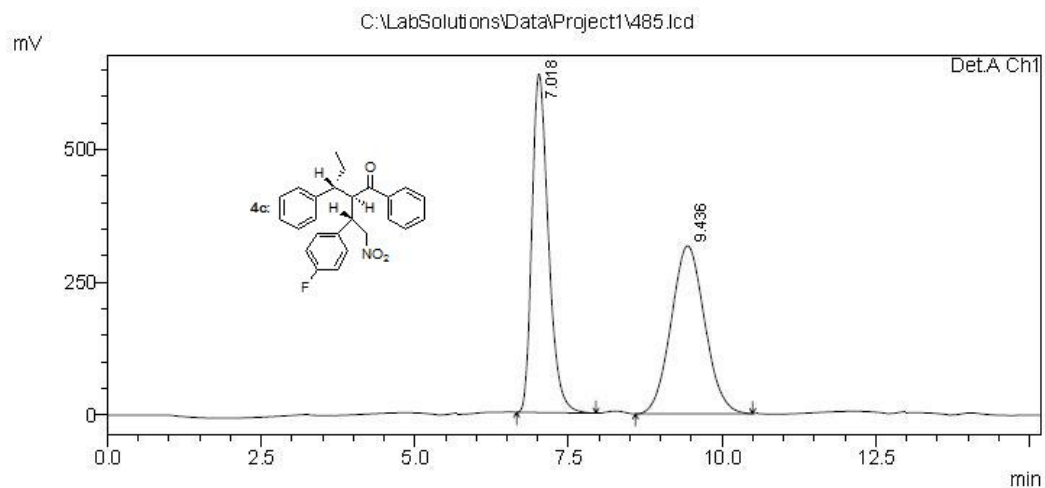

Detector A Ch1 254nm

PeakTable

| Peak# | Ret. Time | Area     | Height | Area %  |
|-------|-----------|----------|--------|---------|
| 1     | 7.018     | 11876958 | 637190 | 49.681  |
| 2     | 9.436     | 12029646 | 316050 | 50.319  |
| Total |           | 23906604 | 953241 | 100.000 |

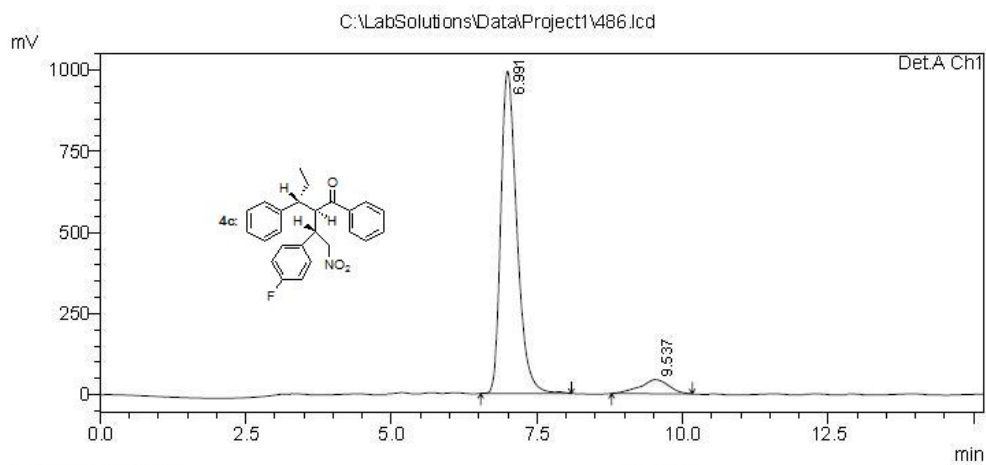

Detector A Ch1 254nm

PeakTable

| Peak# | Ret. Time | Area     | Height  | Area %  |
|-------|-----------|----------|---------|---------|
| 1     | 6.991     | 19135744 | 993658  | 92.732  |
| 2     | 9.537     | 1499726  | 43605   | 7.268   |
| Total |           | 20635470 | 1037263 | 100.000 |

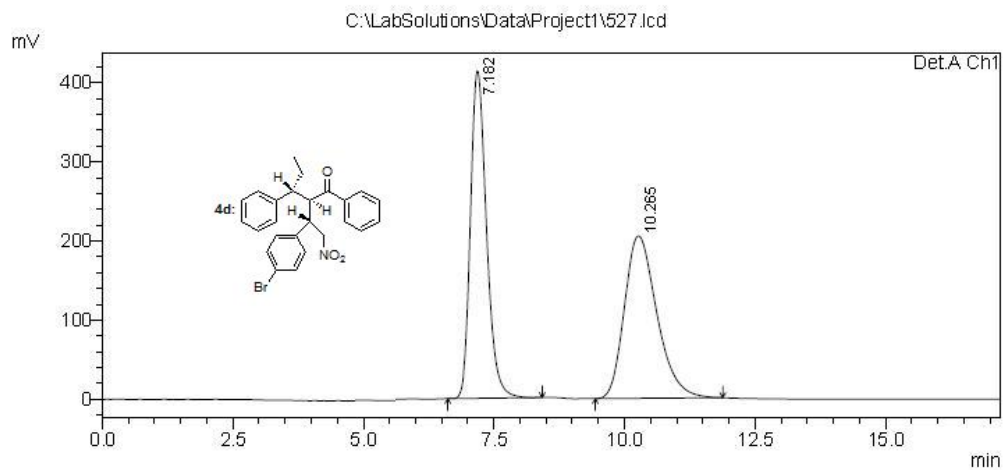

PeakTable

| Peak# | Ret. Time | Area     | Height | Area %  |
|-------|-----------|----------|--------|---------|
| 1     | 7.182     | 8838201  | 413596 | 49.898  |
| 2     | 10.265    | 8874161  | 205281 | 50.102  |
| Total |           | 17712362 | 618877 | 100.000 |

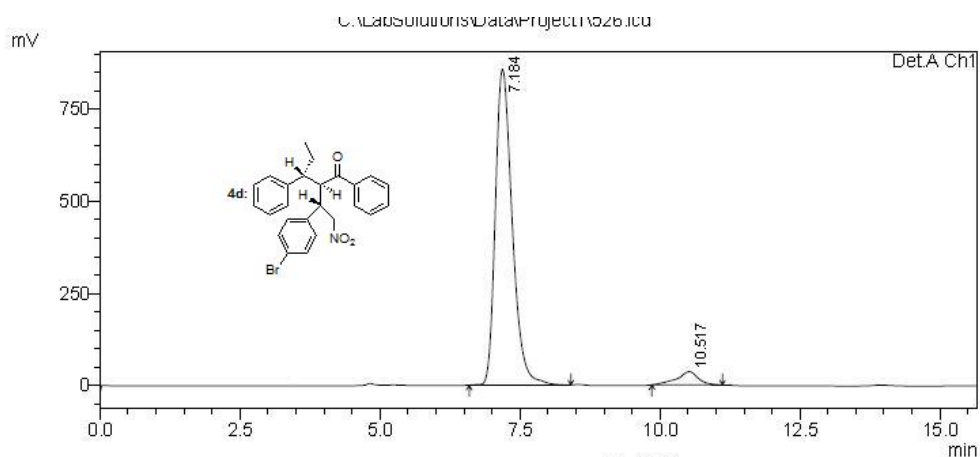

PeakTable

| Peak# | Ret. Time | Area     | Height | Area %  |
|-------|-----------|----------|--------|---------|
| 1     | 7.184     | 17985525 | 857000 | 94.929  |
| 2     | 10.517    | 960776   | 36141  | 5.071   |
| Total |           | 18946300 | 893141 | 100.000 |

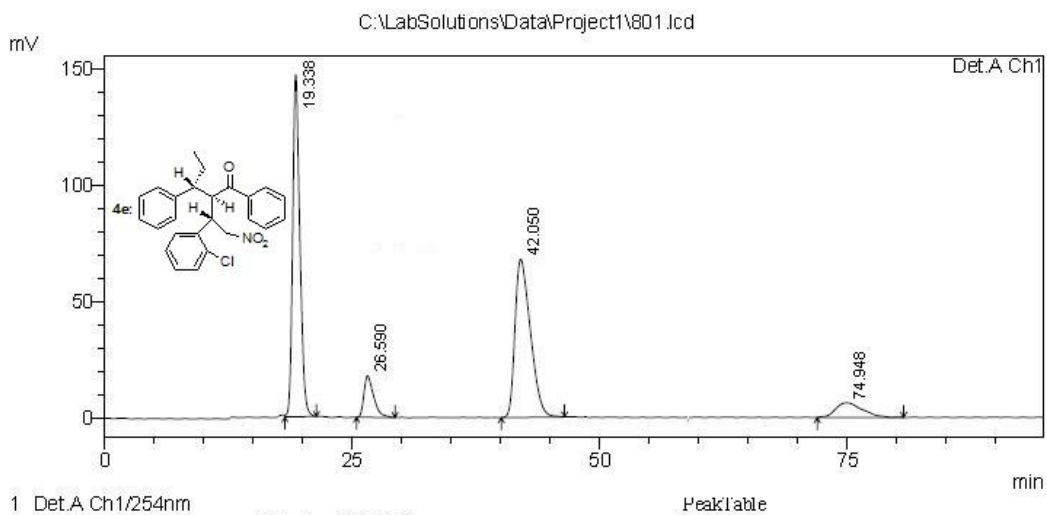

PeakTable

| Peak# | Ret. Time | Area     | Height | Area%   |
|-------|-----------|----------|--------|---------|
| 1     | 19.338    | 7366582  | 147017 | 42.967  |
| 2     | 26.590    | 1208654  | 17829  | 7.050   |
| 3     | 42.050    | 7361545  | 67998  | 42.937  |
| 4     | 74.948    | 1208151  | 6368   | 7.047   |
| Total |           | 17144931 | 239211 | 100.000 |

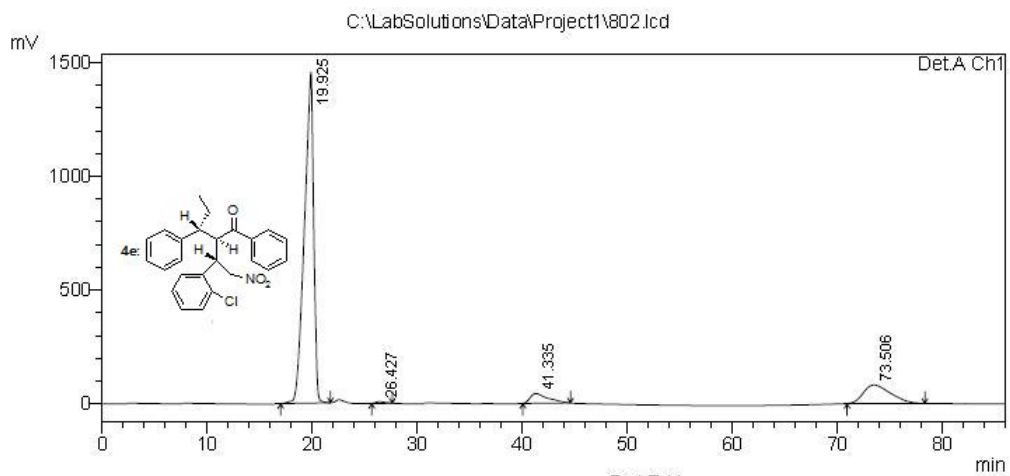

PeakTable

| Peak# | Ret. Time | Area      | Height  | Area%   |
|-------|-----------|-----------|---------|---------|
| 1     | 19.925    | 88620123  | 1453605 | 81.405  |
| 2     | 26.427    | 445289    | 7236    | 0.409   |
| 3     | 41.335    | 5042108   | 43056   | 4.632   |
| 4     | 73.506    | 14755715  | 81543   | 13.554  |
| Total |           | 108863235 | 1585440 | 100.000 |

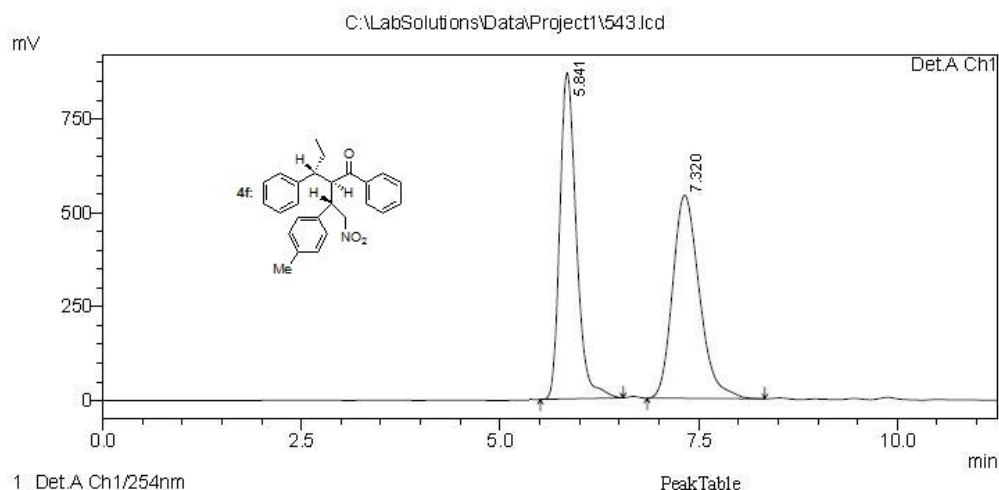

PeakTable

| Peak# | Ret. Time | Area     | Height  | Area %  |
|-------|-----------|----------|---------|---------|
| 1     | 5.841     | 12542357 | 868366  | 49.753  |
| 2     | 7.320     | 12666690 | 541007  | 50.247  |
| Total |           | 25209047 | 1409373 | 100.000 |

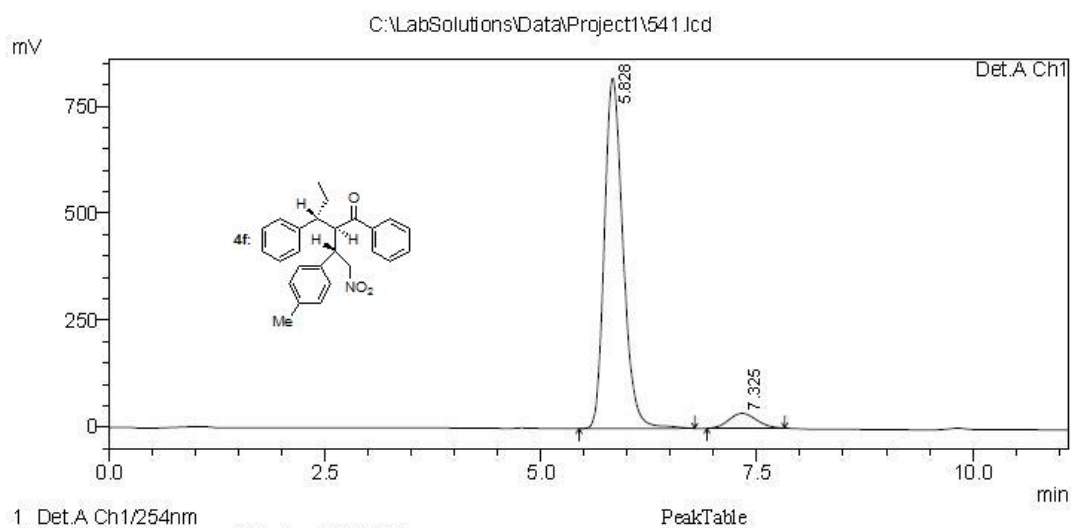

PeakTable

| Peak# | Ret. Time | Area     | Height | Area %  |
|-------|-----------|----------|--------|---------|
| 1     | 5.828     | 12269479 | 817998 | 94.061  |
| 2     | 7.325     | 774726   | 34811  | 5.939   |
| Total |           | 13044205 | 852809 | 100.000 |

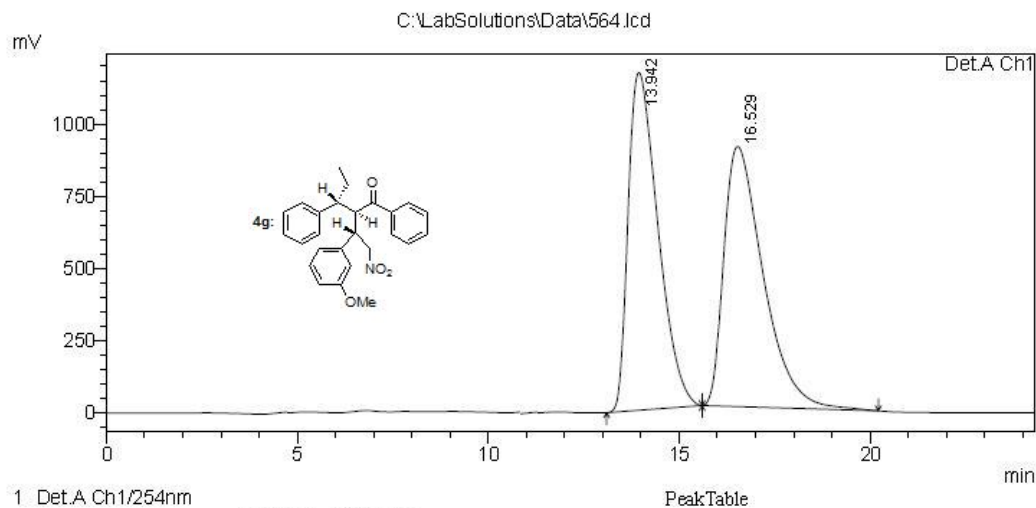

| Peak# | Ret. Time | Area      | Height  | Area %  |
|-------|-----------|-----------|---------|---------|
| 1     | 13.942    | 63474297  | 1169213 | 49.604  |
| 2     | 16.529    | 64488503  | 900371  | 50.396  |
| Total |           | 127962799 | 2069585 | 100.000 |

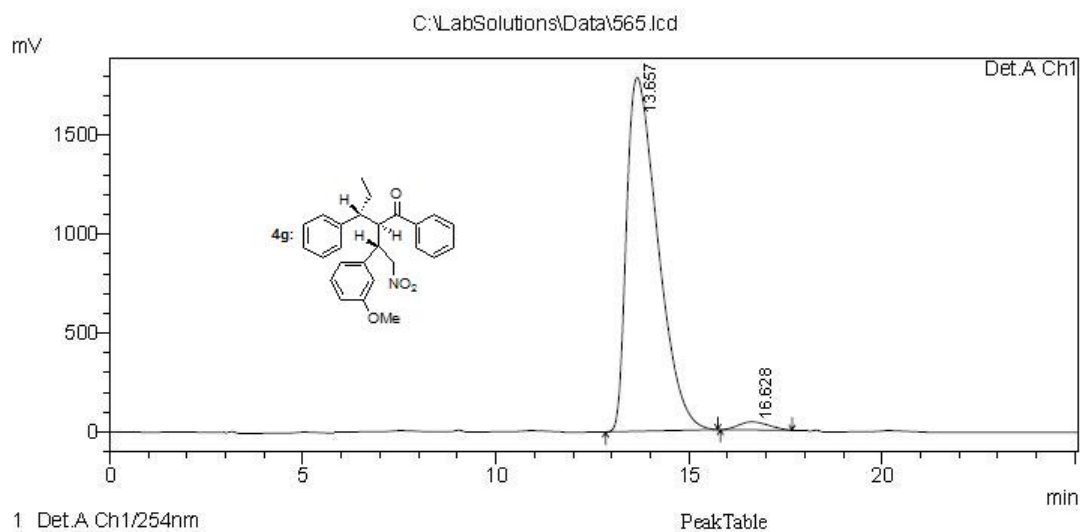

| Peak# | Ret. Time | Area      | Height  | Area %  |
|-------|-----------|-----------|---------|---------|
| 1     | 13.657    | 100666946 | 1787532 | 97.840  |
| 2     | 16.628    | 2221942   | 40502   | 2.160   |
| Total |           | 102888888 | 1828035 | 100.000 |

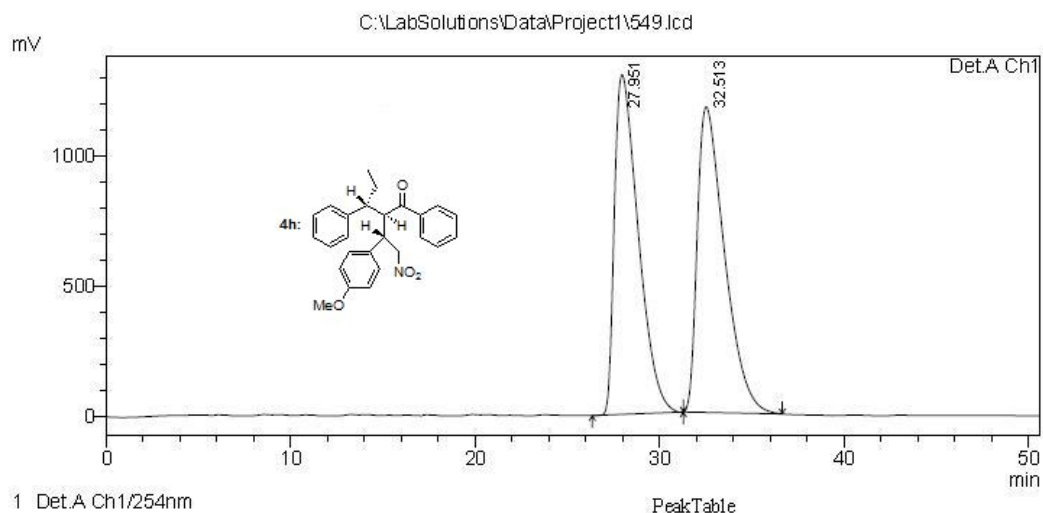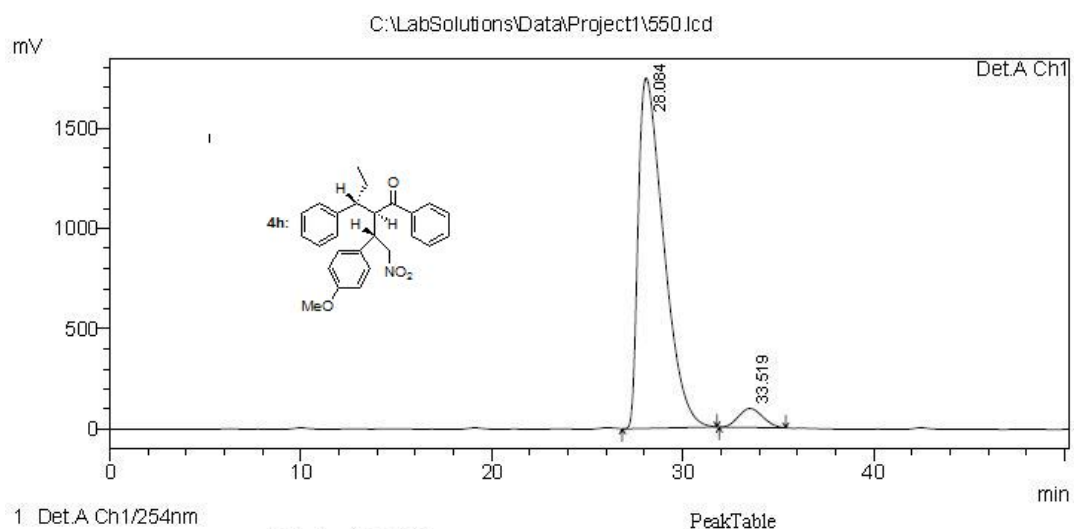



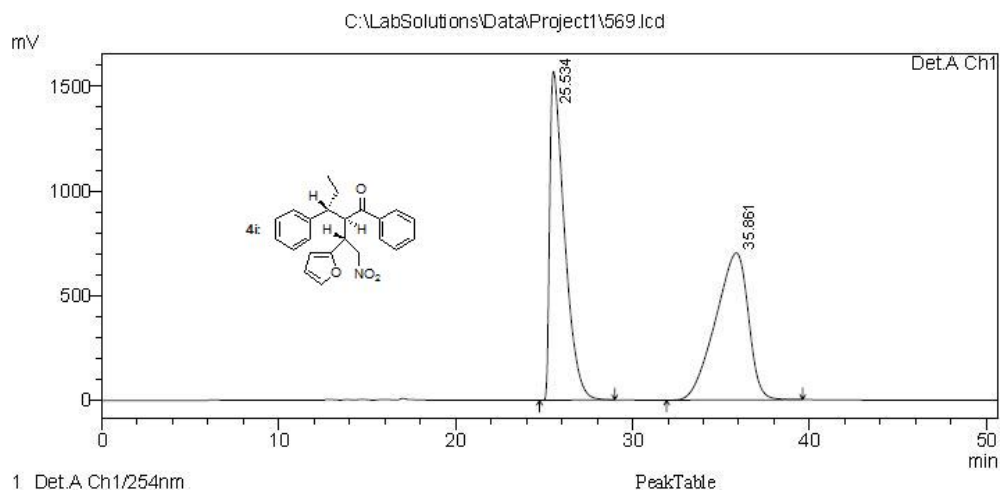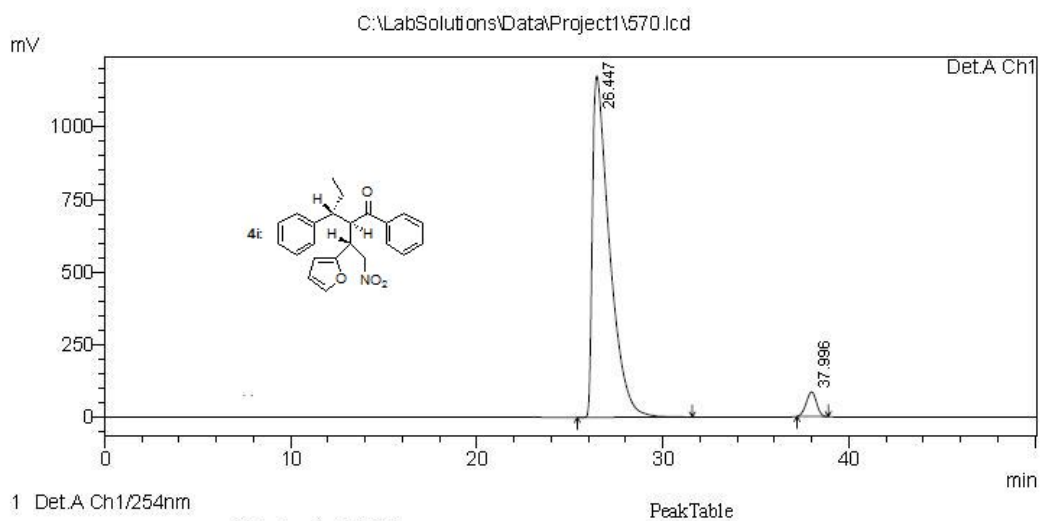

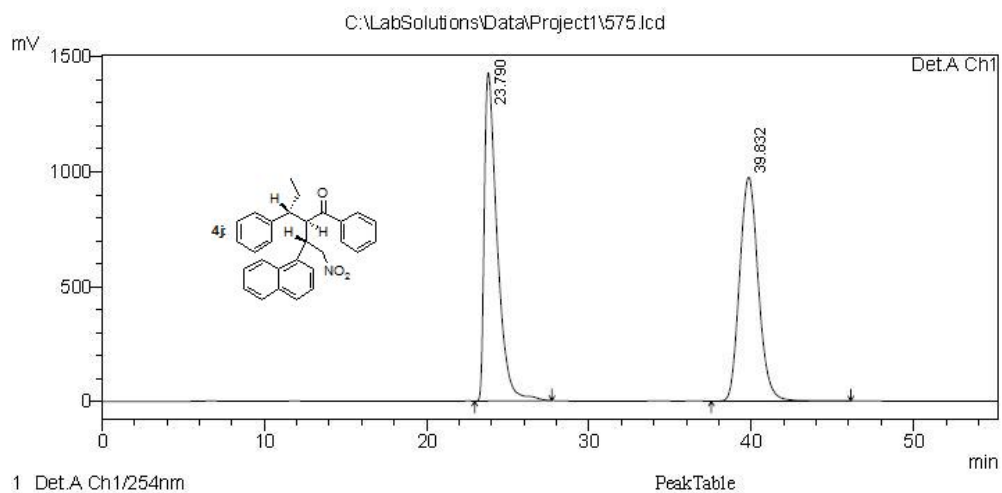

PeakTable

| Peak# | Ret. Time | Area      | Height  | Area %  |
|-------|-----------|-----------|---------|---------|
| 1     | 23.790    | 78461903  | 1428692 | 50.083  |
| 2     | 39.832    | 78202849  | 974811  | 49.917  |
| Total |           | 156664753 | 2403504 | 100.000 |

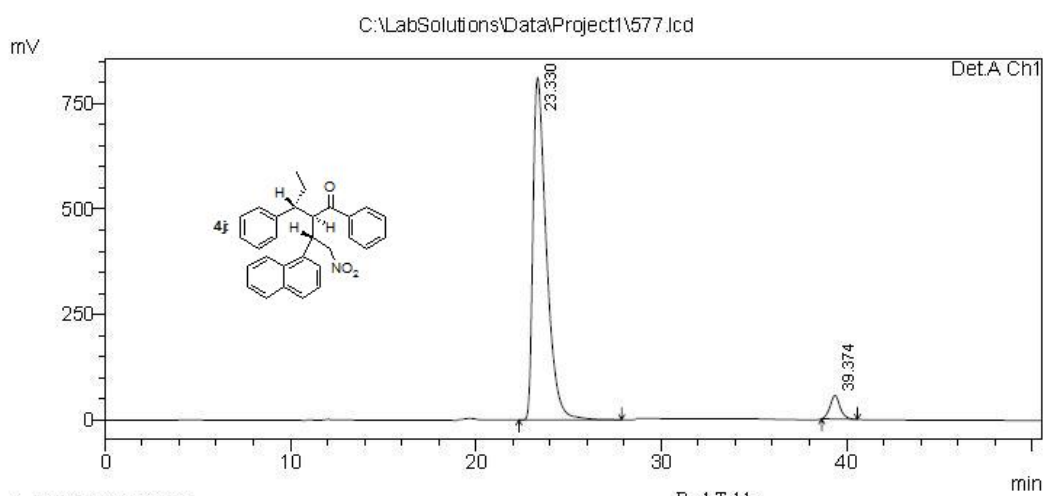

PeakTable

| Peak# | Ret. Time | Area     | Height | Area %  |
|-------|-----------|----------|--------|---------|
| 1     | 23.330    | 40782985 | 810992 | 95.068  |
| 2     | 39.374    | 2115751  | 55782  | 4.932   |
| Total |           | 42898736 | 866774 | 100.000 |

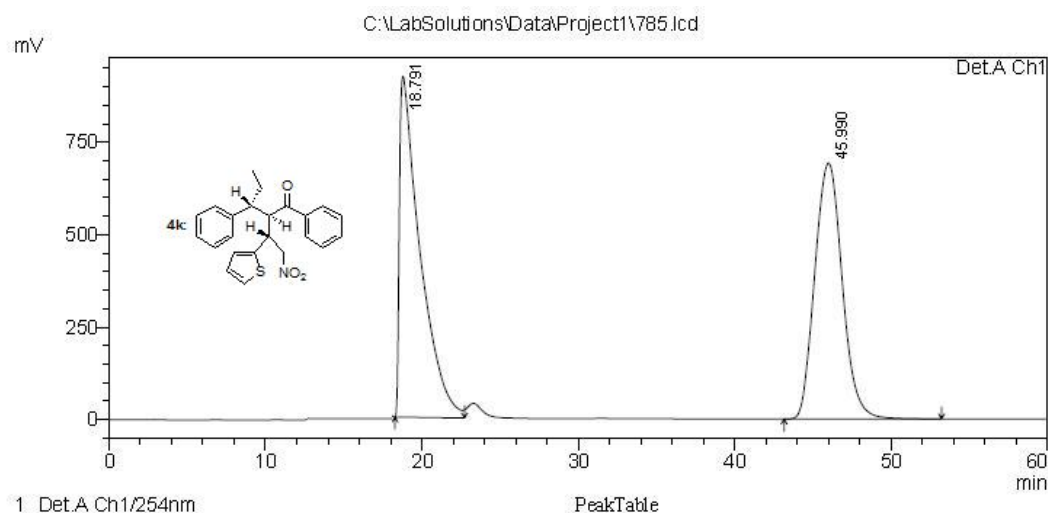

PeakTable

| Detector A Ch1 254nm |           |           |         |         |
|----------------------|-----------|-----------|---------|---------|
| Peak#                | Ret. Time | Area      | Height  | Area %  |
| 1                    | 18.791    | 84366483  | 921475  | 49.974  |
| 2                    | 45.990    | 84455799  | 691987  | 50.026  |
| Total                |           | 168822282 | 1613462 | 100.000 |

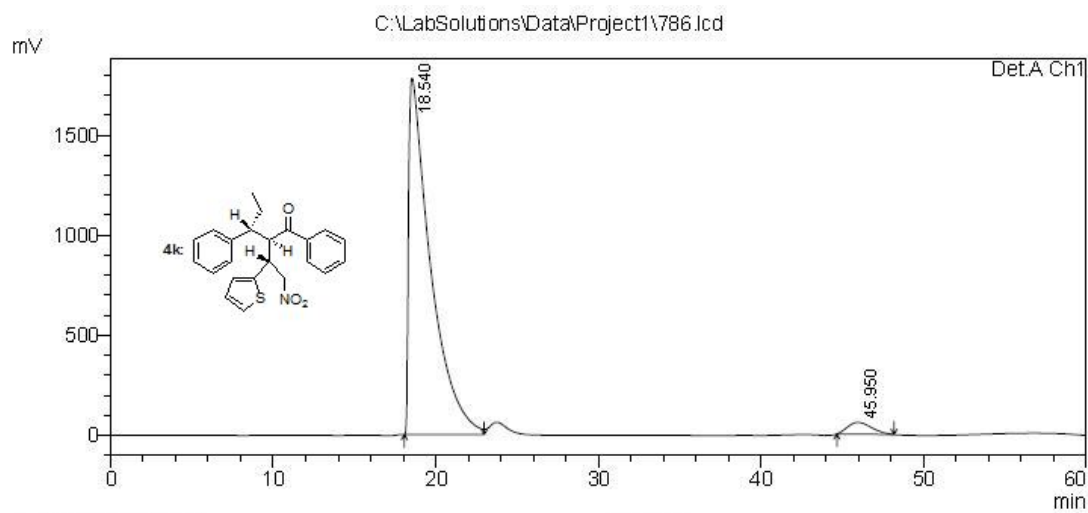

PeakTable

| Detector A Ch1 254nm |           |           |         |         |
|----------------------|-----------|-----------|---------|---------|
| Peak#                | Ret. Time | Area      | Height  | Area %  |
| 1                    | 18.540    | 165943088 | 1782041 | 96.486  |
| 2                    | 45.950    | 6042867   | 58808   | 3.514   |
| Total                |           | 171985955 | 1840848 | 100.000 |

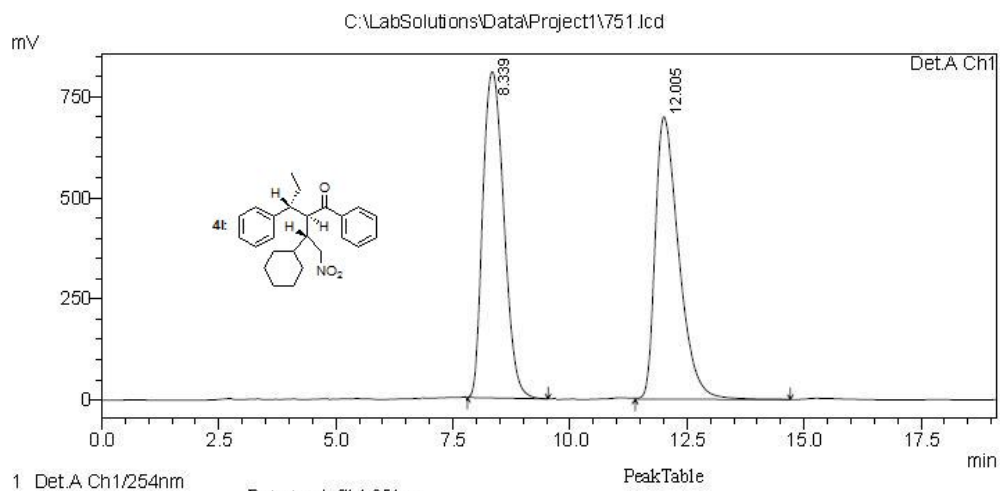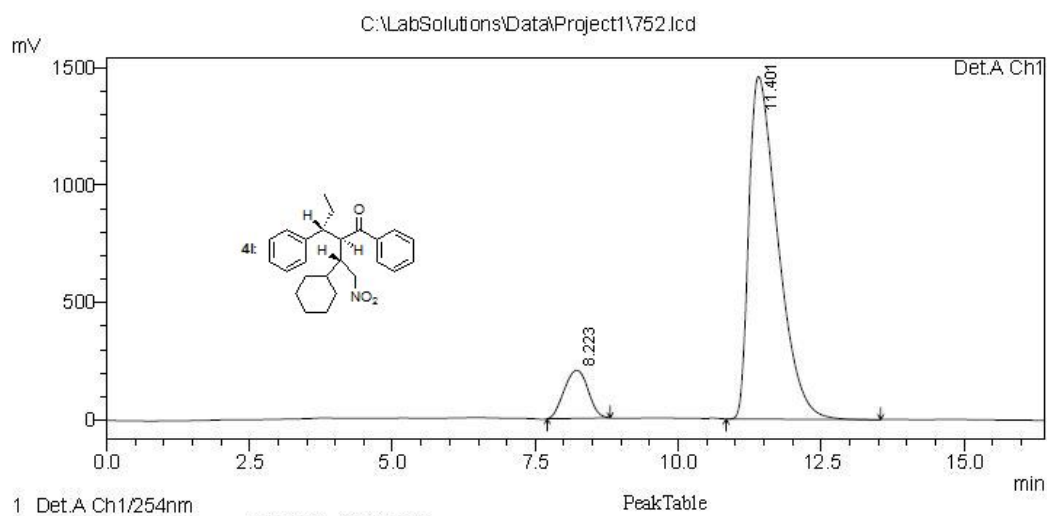

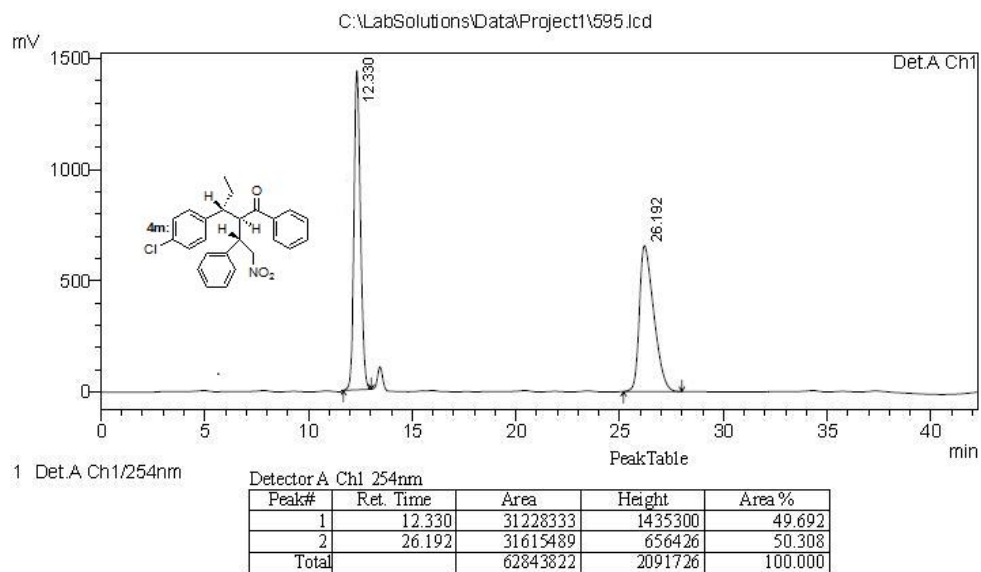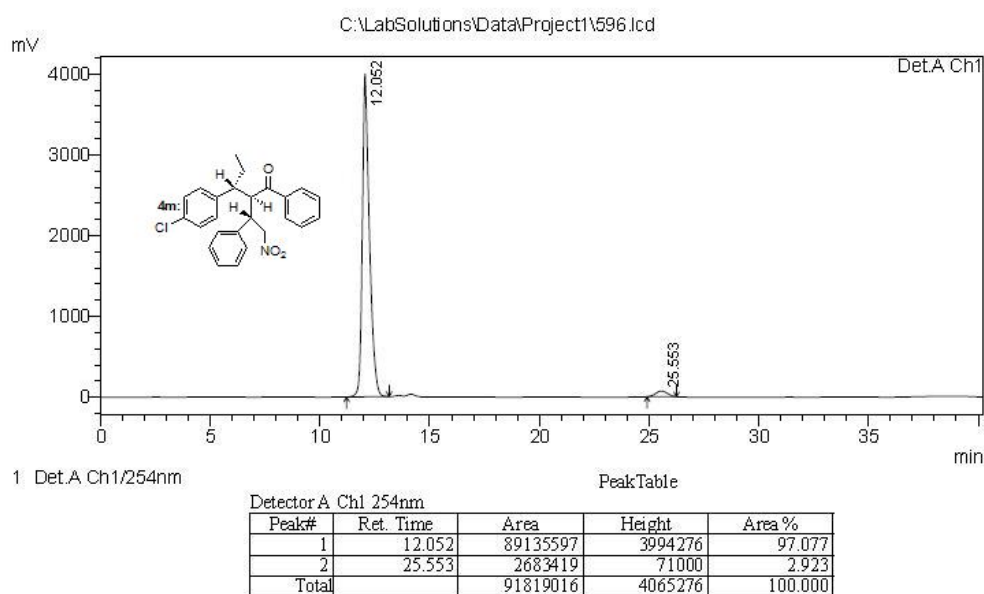

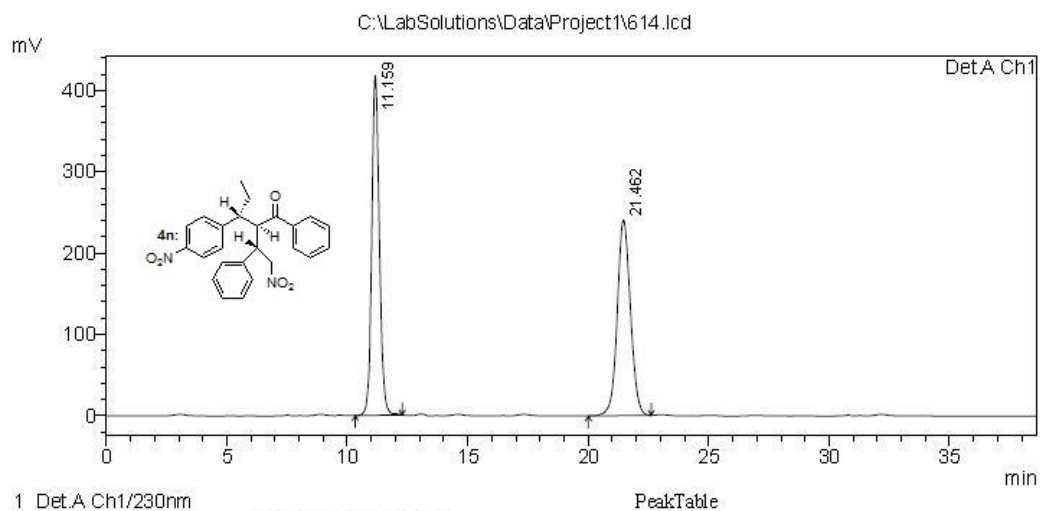

PeakTable

| Peak# | Ret. Time | Area     | Height | Area %  |
|-------|-----------|----------|--------|---------|
| 1     | 11.159    | 9181246  | 418197 | 50.103  |
| 2     | 21.462    | 9143541  | 240693 | 49.897  |
| Total |           | 18324787 | 658890 | 100.000 |

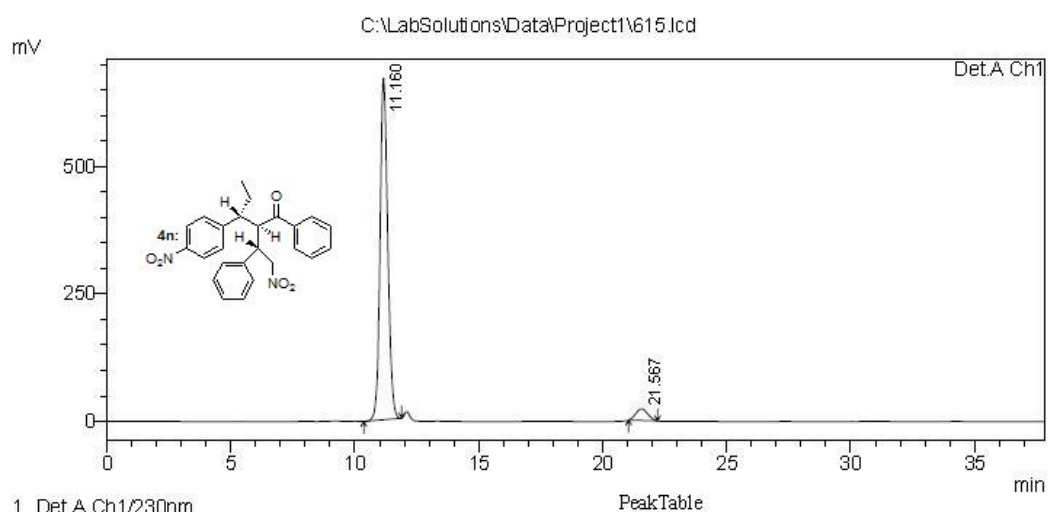

PeakTable

| Peak# | Ret. Time | Area     | Height | Area %  |
|-------|-----------|----------|--------|---------|
| 1     | 11.160    | 14399988 | 670336 | 95.020  |
| 2     | 21.567    | 754694   | 22673  | 4.980   |
| Total |           | 15154682 | 693008 | 100.000 |



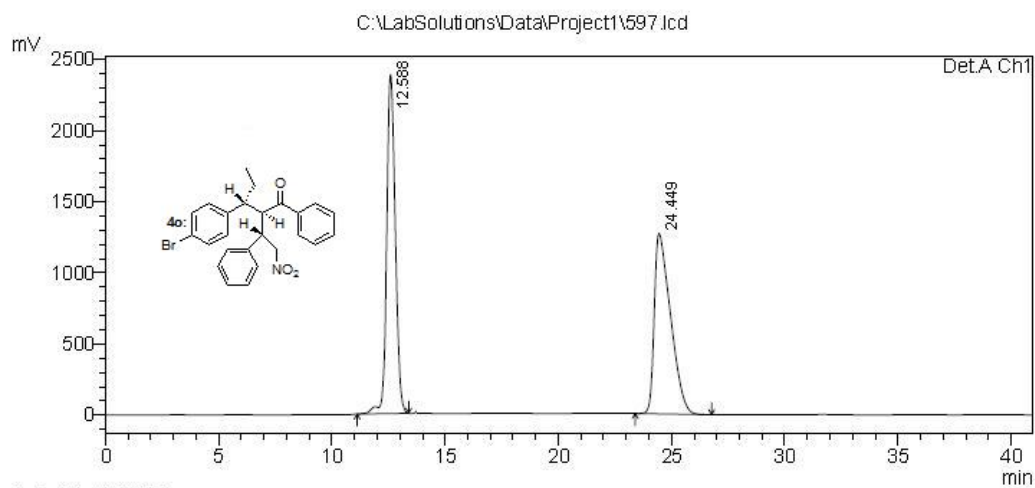

PeakTable

| Peak# | Ret. Time | Area      | Height  | Area %  |
|-------|-----------|-----------|---------|---------|
| 1     | 12.588    | 62983230  | 2384540 | 49.887  |
| 2     | 24.449    | 63267983  | 1268817 | 50.113  |
| Total |           | 126251213 | 3653357 | 100.000 |

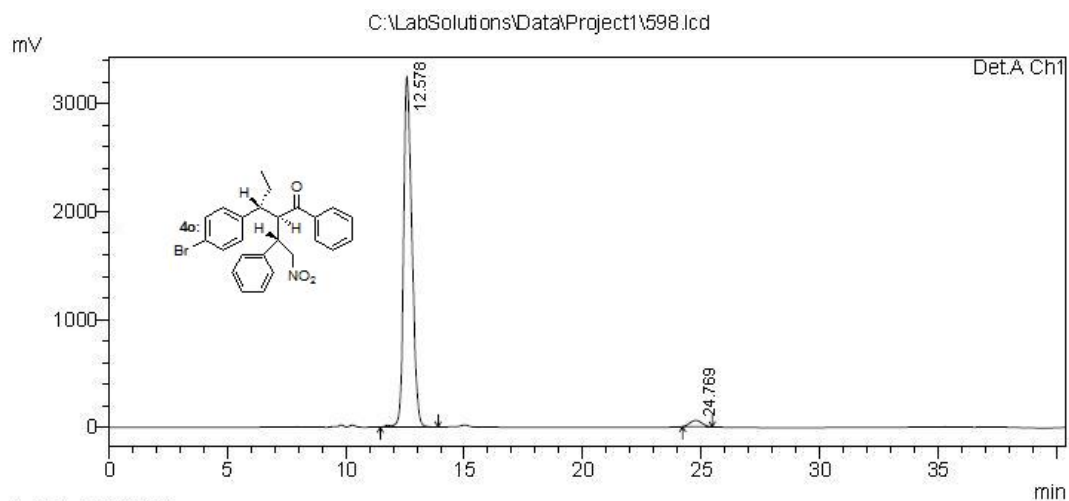

PeakTable

| Peak# | Ret. Time | Area     | Height  | Area %  |
|-------|-----------|----------|---------|---------|
| 1     | 12.578    | 79394439 | 3254302 | 97.488  |
| 2     | 24.769    | 2045586  | 58414   | 2.512   |
| Total |           | 81440025 | 3312717 | 100.000 |

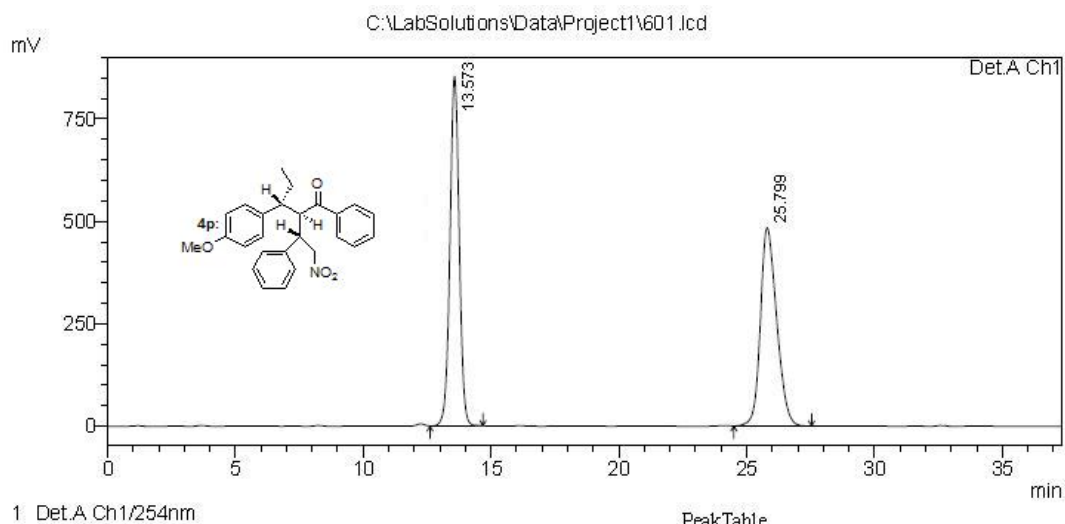

Detector A Ch1 254nm

| Peak# | Ret. Time | Area     | Height  | Area %  |
|-------|-----------|----------|---------|---------|
| 1     | 13.573    | 21514598 | 852702  | 50.093  |
| 2     | 25.799    | 21434604 | 483699  | 49.907  |
| Total |           | 42949202 | 1336401 | 100.000 |

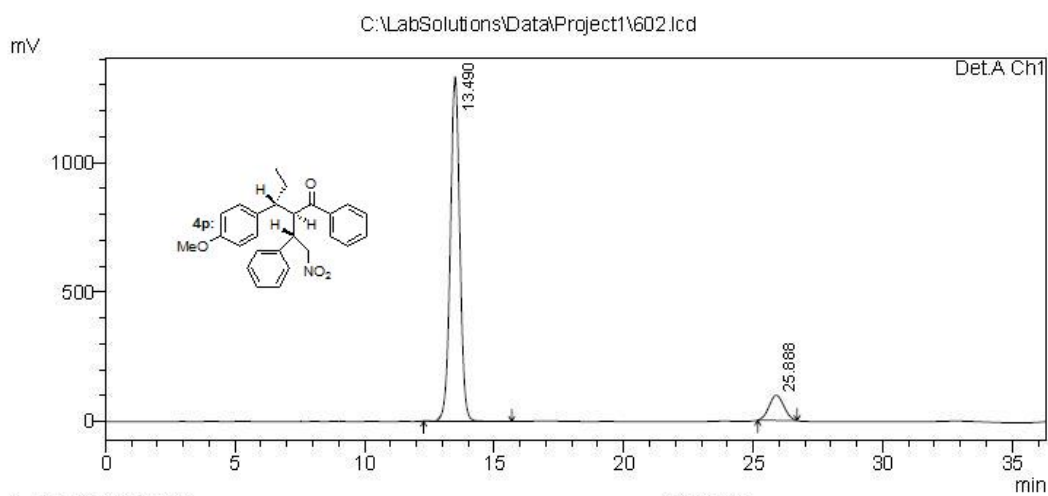

Detector A Ch1 254nm

| Peak# | Ret. Time | Area     | Height  | Area %  |
|-------|-----------|----------|---------|---------|
| 1     | 13.490    | 33849058 | 1330321 | 89.745  |
| 2     | 25.888    | 3867826  | 97135   | 10.255  |
| Total |           | 37716884 | 1427456 | 100.000 |

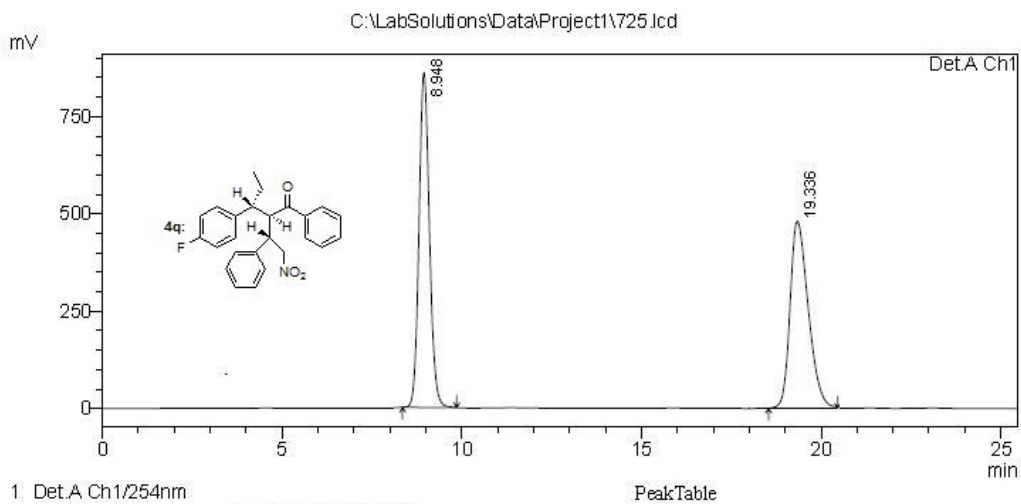

PeakTable

| Detector A Ch1 254nm |           |          |         |         |
|----------------------|-----------|----------|---------|---------|
| Peak#                | Ret. Time | Area     | Height  | Area%   |
| 1                    | 8.948     | 17292808 | 860091  | 50.576  |
| 2                    | 19.336    | 16898854 | 480529  | 49.424  |
| Total                |           | 34191662 | 1340620 | 100.000 |

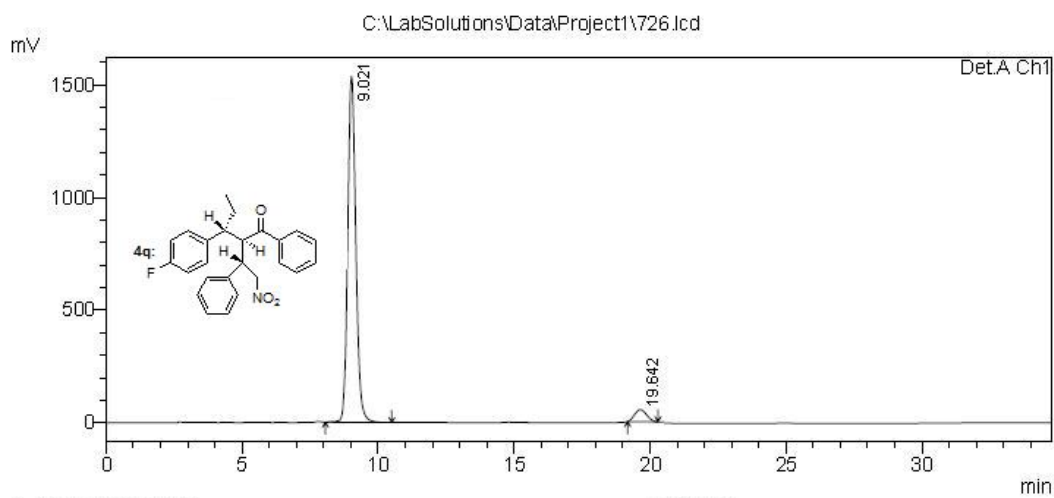

PeakTable

| Detector A Ch1 254nm |           |          |         |         |
|----------------------|-----------|----------|---------|---------|
| Peak#                | Ret. Time | Area     | Height  | Area%   |
| 1                    | 9.021     | 31862947 | 1536913 | 95.111  |
| 2                    | 19.642    | 1637904  | 53278   | 4.889   |
| Total                |           | 33500852 | 1590191 | 100.000 |

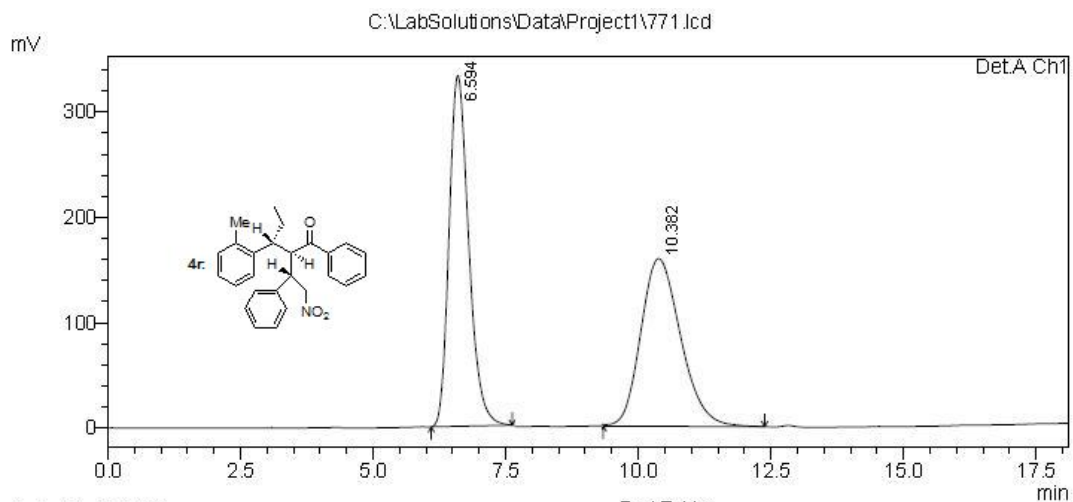

1 Det.A Ch1/254nm

Detector A Ch1 254nm

| Peak# | Ret. Time | Area     | Height | Area %  |
|-------|-----------|----------|--------|---------|
| 1     | 6.594     | 8583076  | 333220 | 50.666  |
| 2     | 10.382    | 8357534  | 159358 | 49.334  |
| Total |           | 16940611 | 492578 | 100.000 |

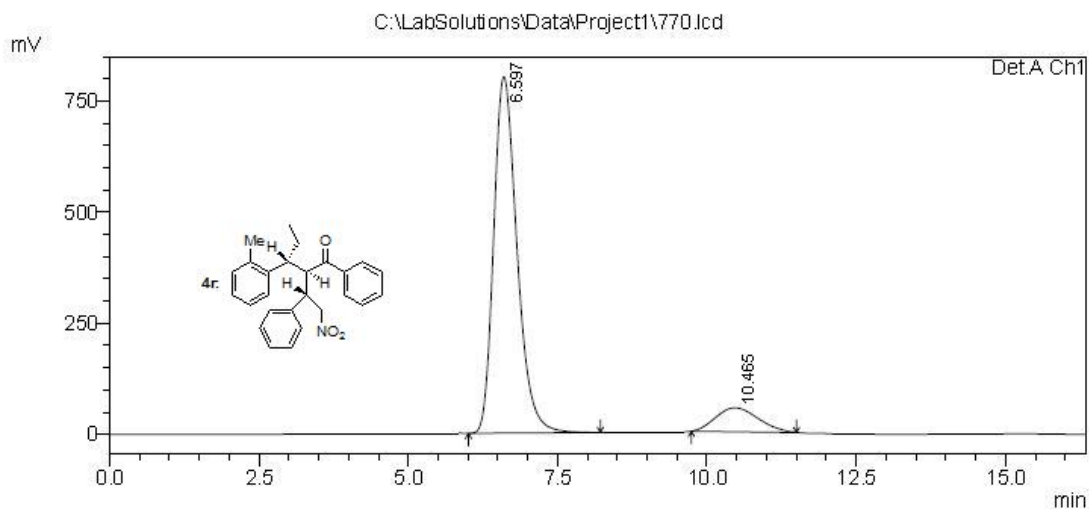

1 Det.A Ch1/254nm

Detector A Ch1 254nm

| Peak# | Ret. Time | Area     | Height | Area %  |
|-------|-----------|----------|--------|---------|
| 1     | 6.597     | 21727797 | 802396 | 89.062  |
| 2     | 10.465    | 2668425  | 53706  | 10.938  |
| Total |           | 24396222 | 856102 | 100.000 |

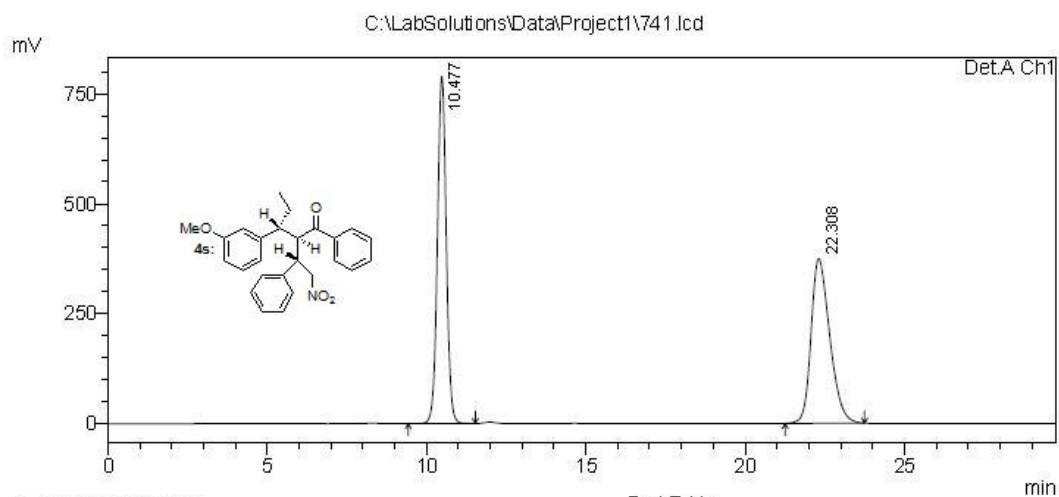

Detector A Ch1 254nm

| Peak# | Ret. Time | Area     | Height  | Area %  |
|-------|-----------|----------|---------|---------|
| 1     | 10.477    | 15219599 | 789065  | 49.916  |
| 2     | 22.308    | 15270997 | 374078  | 50.084  |
| Total |           | 30490597 | 1163143 | 100.000 |

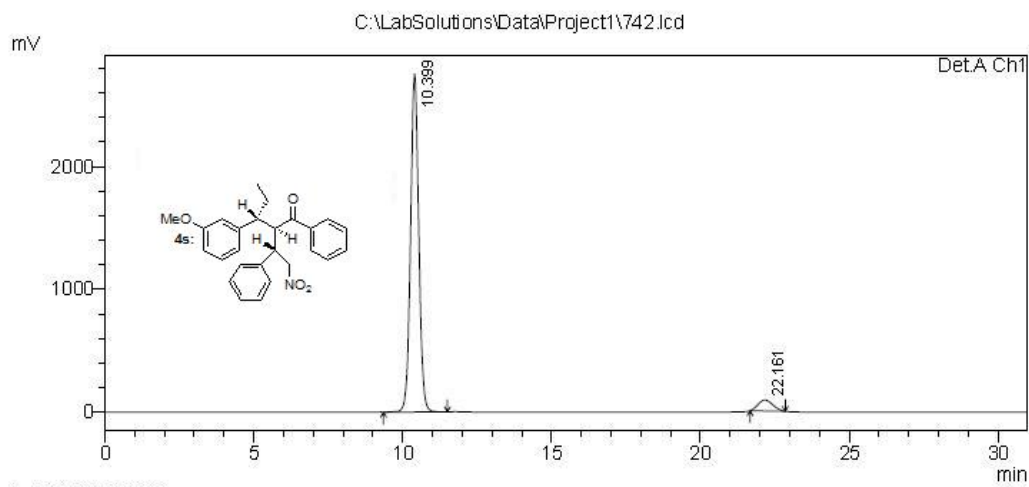

Detector A Ch1 254nm

| Peak# | Ret. Time | Area     | Height  | Area %  |
|-------|-----------|----------|---------|---------|
| 1     | 10.399    | 52615620 | 2752753 | 94.489  |
| 2     | 22.161    | 3068934  | 89805   | 5.511   |
| Total |           | 55684554 | 2842559 | 100.000 |

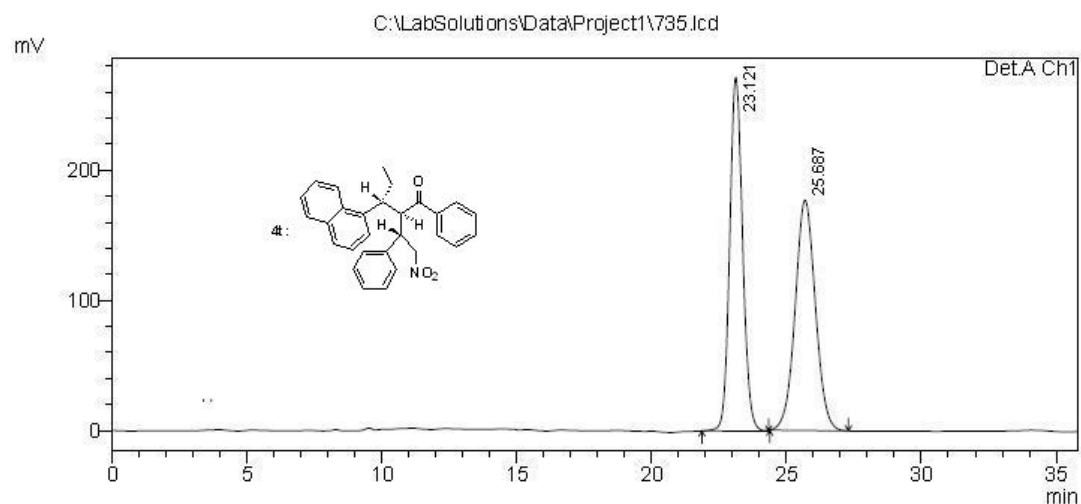

PeakTable

| Detector A Ch1 254nm |           |          |        |         |
|----------------------|-----------|----------|--------|---------|
| Peak#                | Ret. Time | Area     | Height | Area %  |
| 1                    | 23.121    | 9047806  | 271638 | 49.508  |
| 2                    | 25.687    | 9227494  | 176946 | 50.492  |
| Total                |           | 18275300 | 448584 | 100.000 |

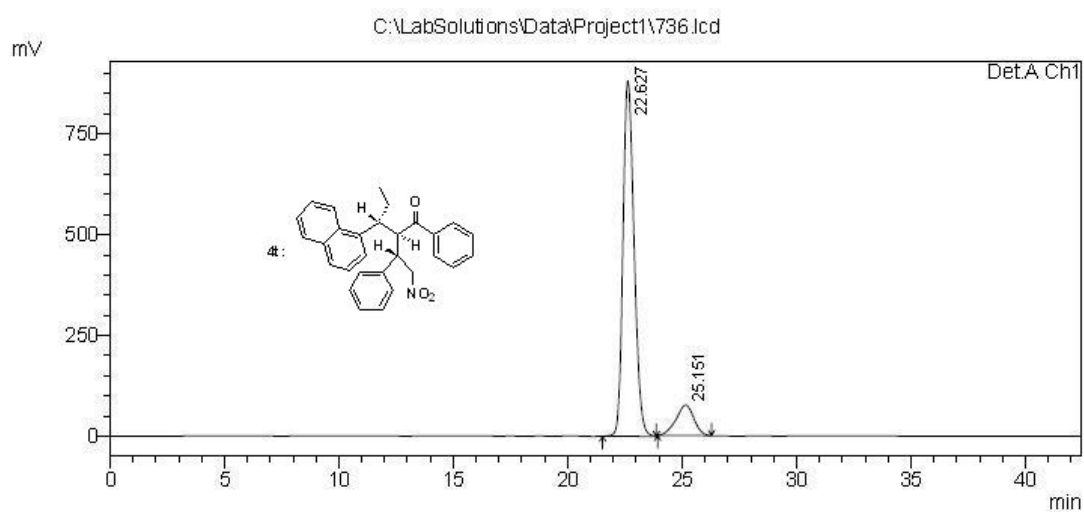

PeakTable

| Detector A Ch1 254nm |           |          |        |         |
|----------------------|-----------|----------|--------|---------|
| Peak#                | Ret. Time | Area     | Height | Area %  |
| 1                    | 22.627    | 29719786 | 882319 | 87.808  |
| 2                    | 25.151    | 4126405  | 75529  | 12.192  |
| Total                |           | 33846191 | 957848 | 100.000 |



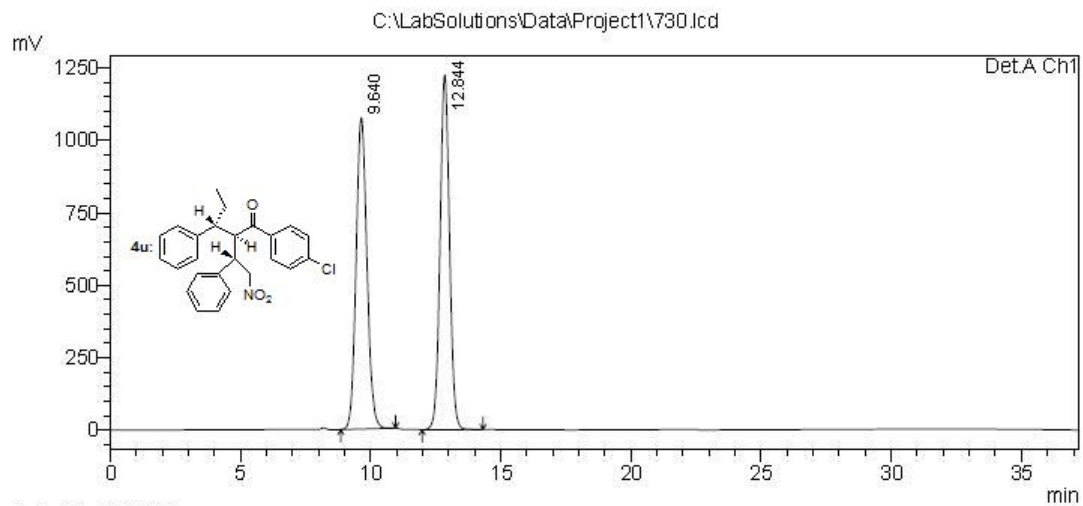

PeakTable

| Peak# | Ret. Time | Area     | Height  | Area %  |
|-------|-----------|----------|---------|---------|
| 1     | 9.640     | 31081776 | 1074772 | 50.154  |
| 2     | 12.844    | 30890326 | 1224459 | 49.846  |
| Total |           | 61972103 | 2299231 | 100.000 |

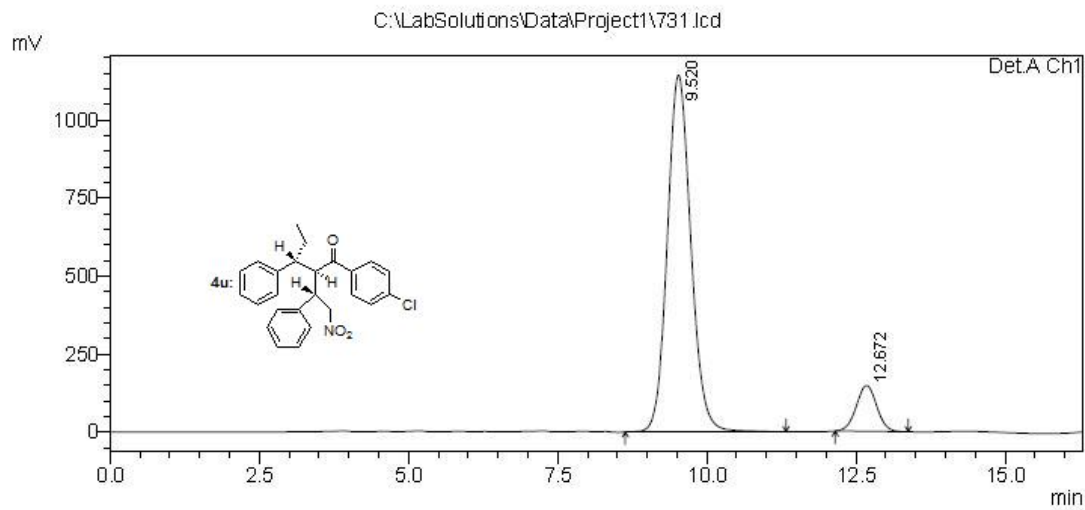

PeakTable

| Peak# | Ret. Time | Area     | Height  | Area %  |
|-------|-----------|----------|---------|---------|
| 1     | 9.520     | 31317445 | 1143487 | 89.950  |
| 2     | 12.672    | 3498887  | 146923  | 10.050  |
| Total |           | 34816331 | 1290409 | 100.000 |

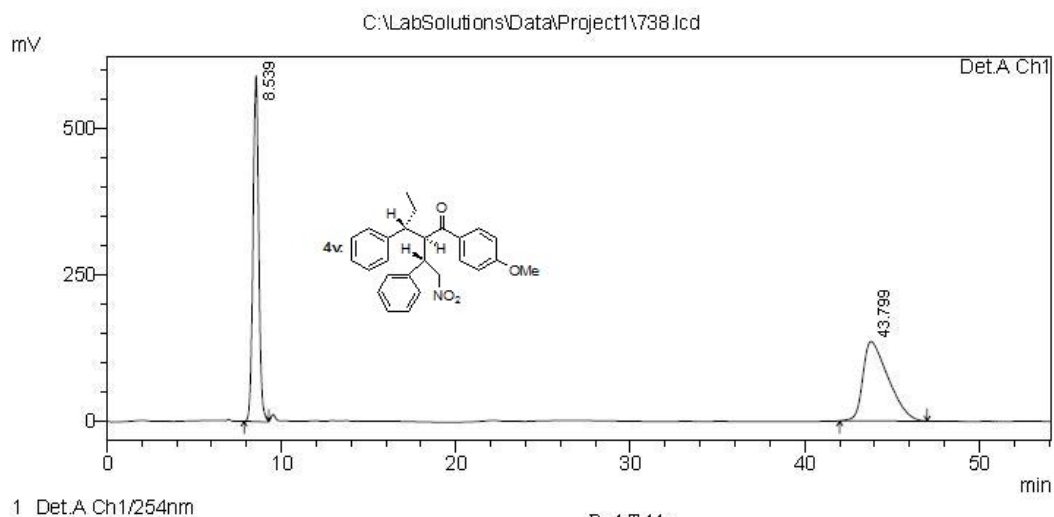

PeakTable

| Peak# | Ret. Time | Area     | Height | Area %  |
|-------|-----------|----------|--------|---------|
| 1     | 8.539     | 13545894 | 590742 | 49.699  |
| 2     | 43.799    | 13710085 | 135400 | 50.301  |
| Total |           | 27255979 | 726142 | 100.000 |

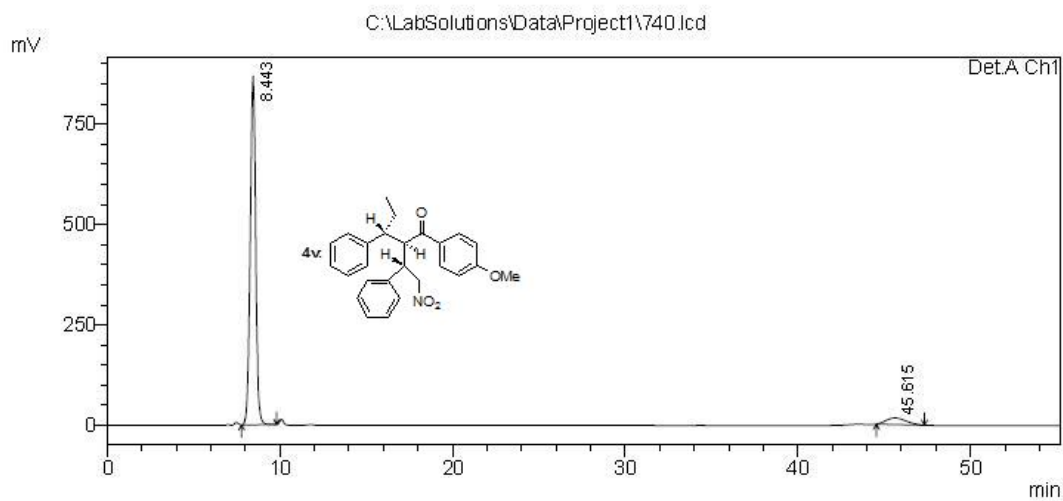

PeakTable

| Peak# | Ret. Time | Area     | Height | Area %  |
|-------|-----------|----------|--------|---------|
| 1     | 8.443     | 19153108 | 867488 | 93.573  |
| 2     | 45.615    | 1315519  | 16314  | 6.427   |
| Total |           | 20468627 | 883802 | 100.000 |

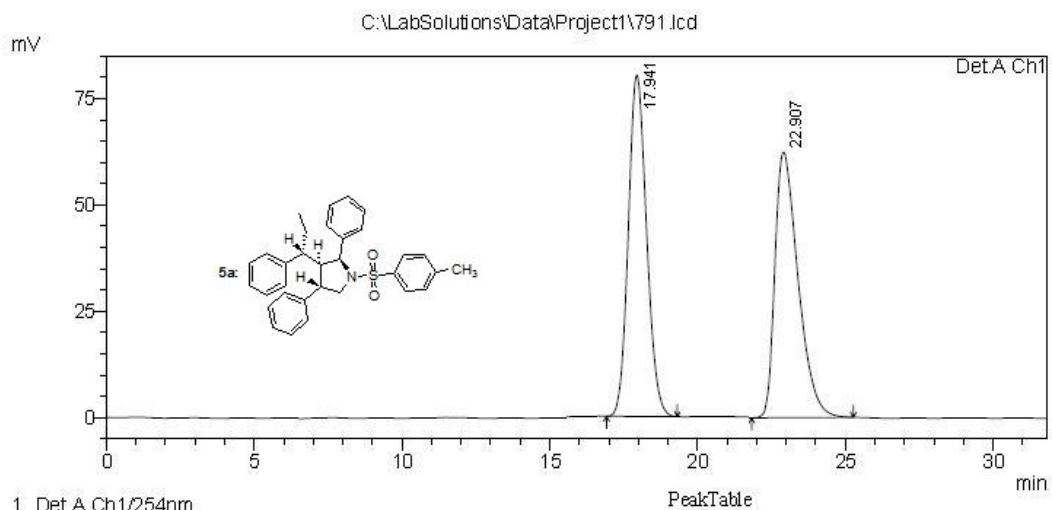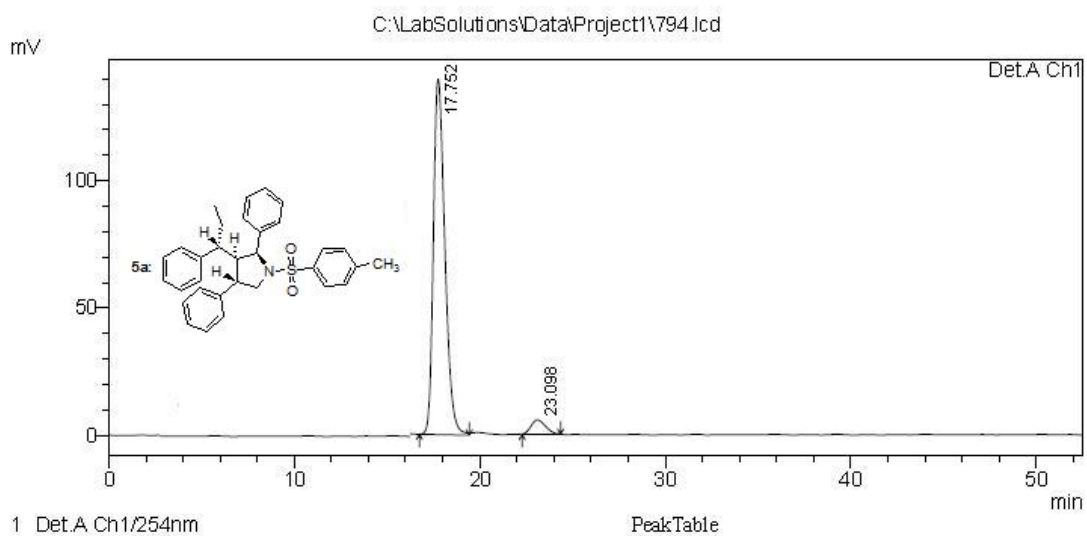

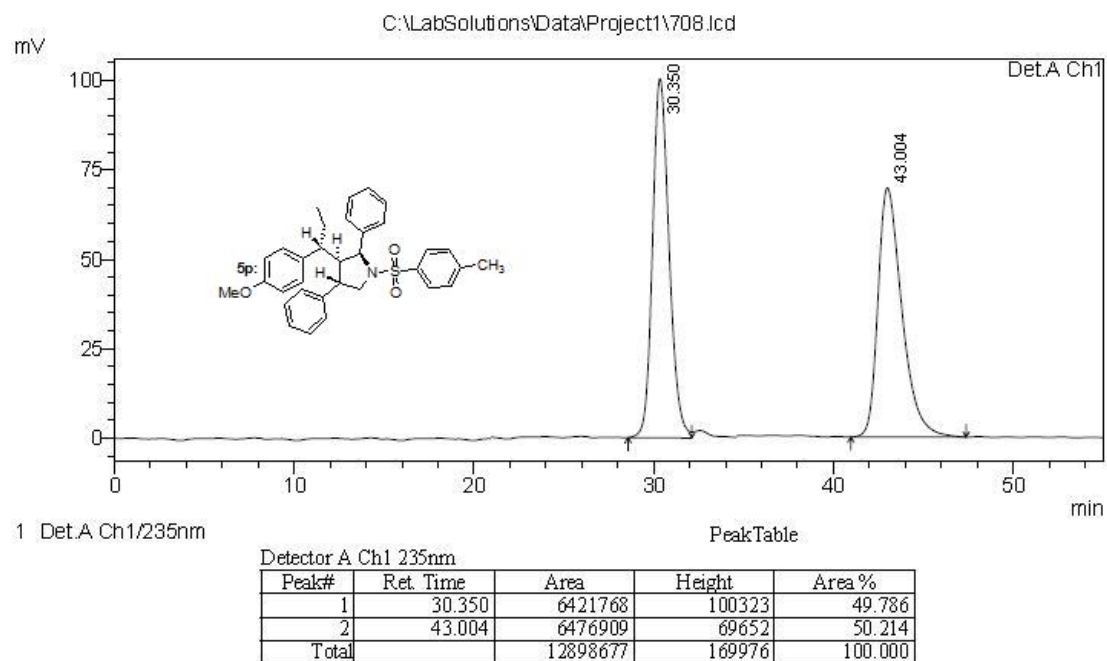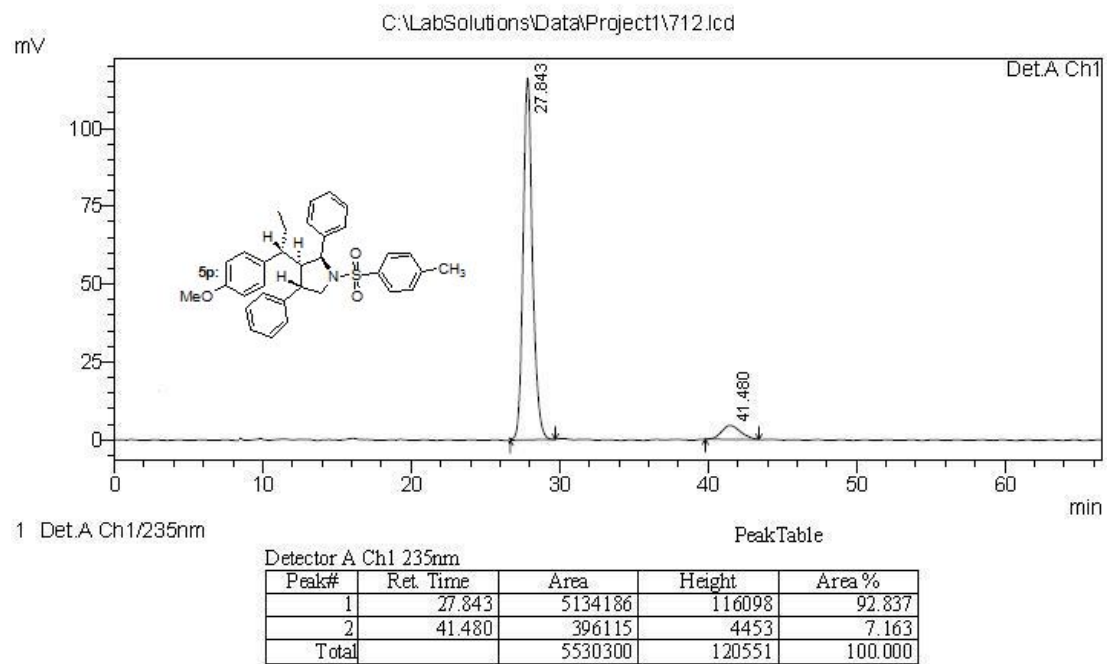

### X-ray crystallographic data for compound 4d

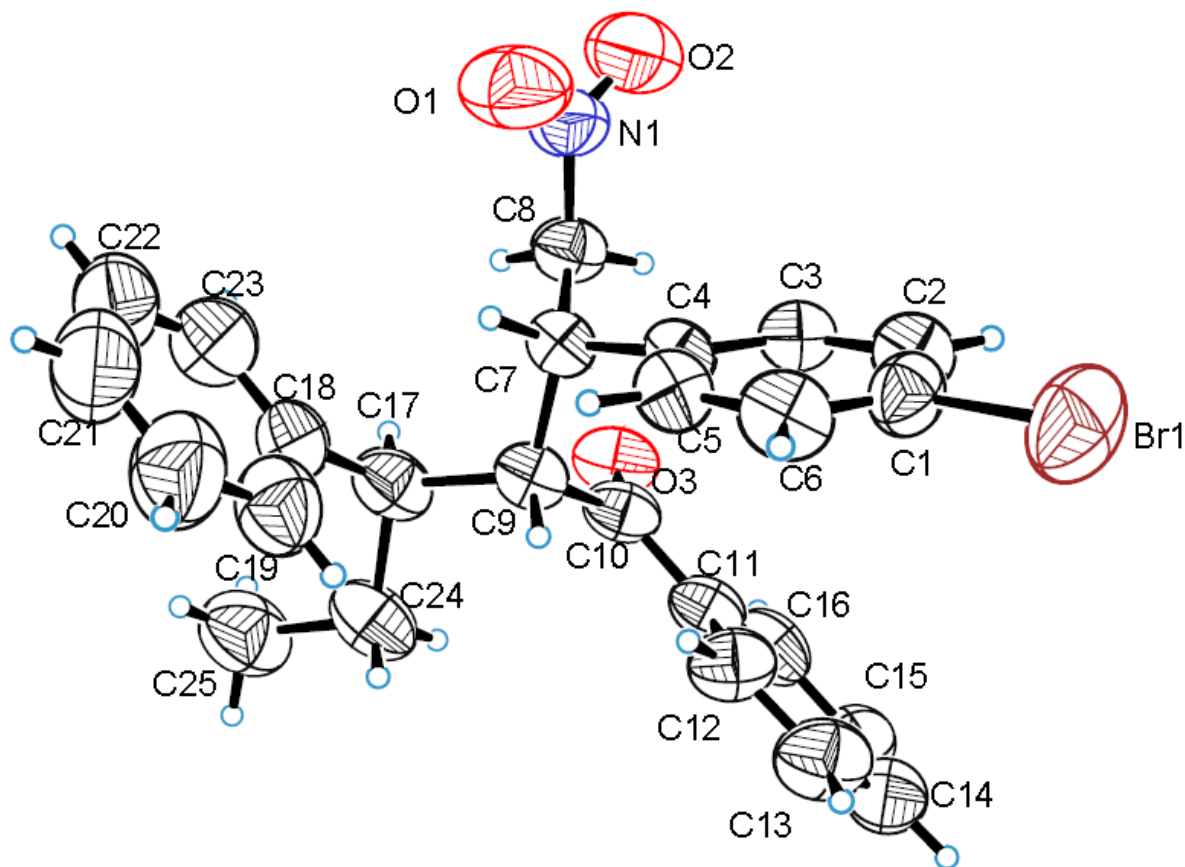

**Table 1:** Crystal data and structure refinement for Nicy-1

|                                         |                                                   |
|-----------------------------------------|---------------------------------------------------|
| Identification code                     | Nicy-1                                            |
| Empirical formula                       | C <sub>25</sub> H <sub>24</sub> BrNO <sub>3</sub> |
| Formula weight                          | 466.36                                            |
| Temperature / K                         | 293(2)                                            |
| Crystal system                          | trigonal                                          |
| Space group                             | R3                                                |
| a / Å, b / Å, c / Å                     | 20.3125(12), 20.3125(12), 15.9673(11)             |
| α / °, β / °, γ / °                     | 90.00, 90.00, 120.00                              |
| Volume / Å <sup>3</sup>                 | 5705.4(6)                                         |
| Z                                       | 9                                                 |
| ρ <sub>calc</sub> / mg mm <sup>-3</sup> | 1.222                                             |
| μ / mm <sup>-1</sup>                    | 2.390                                             |
| F(000)                                  | 2160                                              |
| Crystal size / mm <sup>3</sup>          | 0.32 × 0.20 × 0.20                                |

|                                             |                                                   |
|---------------------------------------------|---------------------------------------------------|
| Theta range for data collection             | 3.7346 to 138.979°                                |
| Index ranges                                | -15 ≤ h ≤ 20, -22 ≤ k ≤ 19, -14 ≤ l ≤ 12          |
| Reflections collected                       | 3385                                              |
| Independent reflections                     | 4702[R(int) = 0.0281]                             |
| Data/restraints/parameters                  | 4702/89/261                                       |
| Goodness-of-fit on F <sup>2</sup>           | 1.082                                             |
| Final R indexes [I > 2σ(I)]                 | R <sub>1</sub> = 0.0842, wR <sub>2</sub> = 0.1875 |
| Final R indexes [all data]                  | R <sub>1</sub> = 0.1031, wR <sub>2</sub> = 0.1980 |
| Largest diff. peak/hole / e Å <sup>-3</sup> | 0.549/-0.247                                      |

**Table 2** Fractional Atomic Coordinates ( $\times 10^4$ ) and Equivalent Isotropic Displacement Parameters ( $\text{\AA}^2 \times 10^3$ ) for Nicy-1.  $U_{\text{eq}}$  is defined as 1/3 of the trace of the orthogonalised  $U_{ij}$  tensor.

| Atom | x          | y          | z          | U(eq)     |
|------|------------|------------|------------|-----------|
| Br1  | 4974.0(11) | 10722.3(9) | 4176.4(10) | 213.0(9)  |
| C4   | 3457(4)    | 9035(4)    | 2092(4)    | 94.7(17)  |
| O3   | 2421(3)    | 6878(3)    | 2138(4)    | 132.9(19) |
| C11  | 2338(4)    | 7427(4)    | 3387(6)    | 107(2)    |
| C7   | 2912(4)    | 8464(4)    | 1467(5)    | 98.5(18)  |
| C10  | 2337(4)    | 7381(4)    | 2490(6)    | 110(2)    |
| C9   | 2187(4)    | 7901(4)    | 1957(5)    | 106.4(19) |
| C5   | 3380(5)    | 9630(4)    | 2322(5)    | 117(2)    |
| C8   | 3246(4)    | 8087(4)    | 947(5)     | 115(2)    |
| C3   | 3997(4)    | 8953(4)    | 2495(5)    | 108(2)    |
| C16  | 2363(4)    | 6855(5)    | 3865(8)    | 132(3)    |
| C2   | 4466(5)    | 9438(5)    | 3113(6)    | 130(3)    |
| C18  | 1342(4)    | 7941(5)    | 753(5)     | 153(3)    |
| C19  | 1172(5)    | 8460(5)    | 1118(5)    | 180(4)    |
| C20  | 1026(5)    | 8932(5)    | 616(7)     | 234(5)    |
| C21  | 1051(5)    | 8885(6)    | -251(7)    | 231(5)    |
| C22  | 1221(5)    | 8367(7)    | -616(4)    | 217(5)    |
| C23  | 1366(5)    | 7895(6)    | -112(6)    | 203(4)    |
| C6   | 3807(6)    | 10122(5)   | 2939(7)    | 136(3)    |
| C15  | 2366(6)    | 6867(8)    | 4757(8)    | 157(4)    |
| C13  | 2363(6)    | 8017(7)    | 4684(9)    | 167(4)    |
| N1   | 3812(5)    | 8628(6)    | 365(5)     | 137(3)    |

|     |         |          |         |        |
|-----|---------|----------|---------|--------|
| C14 | 2389(6) | 7471(7)  | 5161(7) | 144(3) |
| C1  | 4346(5) | 10008(5) | 3323(5) | 127(3) |
| C12 | 2338(5) | 8010(5)  | 3810(6) | 135(3) |
| O1  | 3781(6) | 9068(6)  | 38(7)   | 220(4) |
| O2  | 4364(6) | 8607(7)  | 257(6)  | 221(4) |
| C24 | 759(5)  | 6903(6)  | 1908(8) | 162(4) |
| C25 | 21(7)   | 6364(7)  | 1338(8) | 200(5) |
| C17 | 1471(5) | 7419(5)  | 1329(6) | 132(2) |

**Table 3** Anisotropic Displacement Parameters ( $\text{\AA}^2 \times 10^3$ ) for Nicy-1.

The Anisotropic displacement factor exponent takes the form:

$$-2\pi^2[h^2a^{*2}U_{11}+\dots+2hka \times b \times U_{12}]$$

| Atom | $U_{11}$  | $U_{22}$  | $U_{33}$  | $U_{23}$  | $U_{13}$  | $U_{12}$ |
|------|-----------|-----------|-----------|-----------|-----------|----------|
| Br1  | 254.7(18) | 178.3(12) | 170.0(11) | -64.7(10) | -47.0(11) | 81.1(12) |
| C4   | 88(4)     | 83(4)     | 117(5)    | 7(3)      | 9(3)      | 46(3)    |
| O3   | 144(4)    | 102(3)    | 166(5)    | 8(3)      | 38(4)     | 71(3)    |
| C11  | 92(4)     | 84(4)     | 142(6)    | 6(4)      | 20(4)     | 41(3)    |
| C7   | 93(4)     | 89(4)     | 115(5)    | 1(3)      | 3(4)      | 46(4)    |
| C10  | 99(5)     | 85(4)     | 136(6)    | 1(4)      | 25(4)     | 39(4)    |
| C9   | 103(4)    | 93(4)     | 124(5)    | -1(4)     | 11(4)     | 49(4)    |
| C5   | 117(6)    | 93(5)     | 138(6)    | -1(5)     | -5(5)     | 50(4)    |
| C8   | 109(5)    | 103(5)    | 118(5)    | -12(4)    | 14(4)     | 42(4)    |
| C3   | 120(5)    | 88(4)     | 116(5)    | -4(4)     | 10(4)     | 53(4)    |
| C16  | 104(5)    | 104(5)    | 197(10)   | 0(6)      | 4(6)      | 57(4)    |
| C2   | 133(6)    | 113(6)    | 146(7)    | -7(5)     | 4(5)      | 64(5)    |
| C18  | 103(5)    | 171(7)    | 148(6)    | -6(5)     | -16(5)    | 41(5)    |
| C19  | 171(8)    | 171(7)    | 209(7)    | 24(6)     | -16(6)    | 94(6)    |
| C20  | 235(10)   | 234(9)    | 240(8)    | 28(7)     | -35(8)    | 122(8)   |
| C21  | 203(9)    | 246(9)    | 222(8)    | 25(7)     | -45(8)    | 96(7)    |
| C22  | 165(8)    | 245(10)   | 210(8)    | 35(6)     | -23(7)    | 81(7)    |
| C23  | 160(8)    | 225(9)    | 187(6)    | 14(6)     | -3(7)     | 68(6)    |
| C6   | 149(7)    | 93(5)     | 173(8)    | -6(5)     | 9(7)      | 66(5)    |
| C15  | 136(7)    | 176(10)   | 146(9)    | 45(8)     | 16(7)     | 70(7)    |
| C13  | 183(10)   | 139(9)    | 181(11)   | -31(8)    | 25(9)     | 81(8)    |
| N1   | 137(6)    | 178(7)    | 122(5)    | 30(5)     | 28(4)     | 98(6)    |
| C14  | 145(8)    | 148(9)    | 148(8)    | -2(7)     | 11(6)     | 80(7)    |
| C1   | 131(6)    | 111(6)    | 116(6)    | -11(5)    | -16(5)    | 42(5)    |



|     |        |        |         |        |       |        |
|-----|--------|--------|---------|--------|-------|--------|
| C12 | 153(8) | 115(6) | 138(8)  | -6(5)  | 23(6) | 67(5)  |
| O1  | 226(7) | 222(7) | 234(8)  | 87(6)  | 78(6) | 128(6) |
| O2  | 173(6) | 283(8) | 217(7)  | 70(6)  | 48(5) | 121(6) |
| C24 | 108(5) | 126(7) | 228(11) | 7(6)   | 19(6) | 39(5)  |
| C25 | 148(6) | 182(8) | 230(9)  | -25(7) | 7(6)  | 53(5)  |
| C17 | 107(4) | 120(5) | 159(6)  | -25(4) | 7(4)  | 49(4)  |

**Table 4** Bond Lengths for Nicy-1.

| Atom | Atom | Length/Å  | Atom | Atom | Length/Å  |
|------|------|-----------|------|------|-----------|
| Br1  | C1   | 1.933(8)  | C2   | C1   | 1.341(12) |
| C4   | C7   | 1.512(9)  | C18  | C19  | 1.3900    |
| C4   | C5   | 1.345(10) | C18  | C23  | 1.3900    |
| C4   | C3   | 1.351(10) | C18  | C17  | 1.523(11) |
| O3   | C10  | 1.251(8)  | C19  | C20  | 1.3900    |
| C11  | C10  | 1.435(11) | C20  | C21  | 1.3900    |
| C11  | C16  | 1.411(12) | C21  | C22  | 1.3900    |
| C11  | C12  | 1.366(11) | C22  | C23  | 1.3900    |
| C7   | C9   | 1.551(9)  | C6   | C1   | 1.371(12) |
| C7   | C8   | 1.502(9)  | C15  | C14  | 1.367(15) |
| C10  | C9   | 1.500(10) | C13  | C14  | 1.367(15) |
| C9   | C17  | 1.630(11) | C13  | C12  | 1.396(15) |
| C5   | C6   | 1.362(12) | N1   | O1   | 1.064(10) |
| C8   | N1   | 1.458(10) | N1   | O2   | 1.156(10) |
| C3   | C2   | 1.383(11) | C24  | C25  | 1.624(15) |
| C16  | C15  | 1.425(14) | C24  | C17  | 1.591(13) |

**Table 5** Bond Angles for Nicy-1.

| Atom | Atom | Atom | Angle /°  | Atom | Atom | Atom | Angle /° |
|------|------|------|-----------|------|------|------|----------|
| C4   | C7   | C9   | 107.1(6)  | C19  | C18  | C23  | 120.0    |
| C4   | C5   | C6   | 122.6(8)  | C19  | C18  | C17  | 118.1(7) |
| C4   | C3   | C2   | 124.4(7)  | C19  | C20  | C21  | 120.0    |
| O3   | C10  | C11  | 120.3(7)  | C20  | C19  | C18  | 120.0    |
| O3   | C10  | C9   | 118.6(8)  | C20  | C21  | C22  | 120.0    |
| C11  | C10  | C9   | 121.0(7)  | C21  | C22  | C23  | 120.0    |
| C11  | C16  | C15  | 122.0(9)  | C22  | C23  | C18  | 120.0    |
| C11  | C12  | C13  | 119.1(10) | C23  | C18  | C17  | 121.9(7) |

|     |     |     |          |     |     |     |           |
|-----|-----|-----|----------|-----|-----|-----|-----------|
| C7  | C9  | C17 | 111.4(6) | C6  | C1  | Br1 | 118.2(8)  |
| C10 | C9  | C7  | 110.7(6) | C13 | C14 | C15 | 117.8(11) |
| C10 | C9  | C17 | 111.1(6) | N1  | C8  | C7  | 110.9(7)  |
| C5  | C4  | C7  | 120.0(7) | C14 | C15 | C16 | 118.9(11) |
| C5  | C4  | C3  | 116.6(7) | C14 | C13 | C12 | 124.5(10) |
| C5  | C6  | C1  | 118.0(8) | C1  | C2  | C3  | 115.8(9)  |
| C8  | C7  | C4  | 114.3(6) | C12 | C11 | C10 | 123.3(8)  |
| C8  | C7  | C9  | 114.1(6) | C12 | C11 | C16 | 117.5(9)  |
| C3  | C4  | C7  | 123.3(6) | O1  | N1  | C8  | 126.1(10) |
| C16 | C11 | C10 | 119.2(8) | O1  | N1  | O2  | 115.0(11) |
| C2  | C1  | Br1 | 119.1(8) | O2  | N1  | C8  | 118.8(10) |
| C2  | C1  | C6  | 122.6(8) | C24 | C17 | C9  | 106.3(8)  |
| C18 | C17 | C9  | 111.5(7) | C17 | C24 | C25 | 110.3(9)  |
| C18 | C17 | C24 | 113.1(8) |     |     |     |           |

**Table 6** Torsion Angles for Nicy-1.

| <b>A</b> | <b>B</b> | <b>C</b> | <b>D</b> | <b>Angle/°</b> |
|----------|----------|----------|----------|----------------|
| C4       | C7       | C9       | C10      | -72.6(7)       |
| C4       | C7       | C9       | C17      | 163.2(6)       |
| C4       | C7       | C8       | N1       | -69.1(8)       |
| C4       | C5       | C6       | C1       | 1.5(14)        |
| C4       | C3       | C2       | C1       | 1.8(12)        |
| O3       | C10      | C9       | C7       | -71.5(8)       |
| O3       | C10      | C9       | C17      | 52.8(8)        |
| C11      | C10      | C9       | C7       | 112.2(7)       |
| C11      | C10      | C9       | C17      | -123.4(7)      |
| C11      | C16      | C15      | C14      | -3.7(14)       |
| C7       | C4       | C5       | C6       | 173.6(8)       |
| C7       | C4       | C3       | C2       | -175.2(7)      |
| C7       | C9       | C17      | C18      | -53.0(8)       |
| C7       | C9       | C17      | C24      | -176.8(7)      |
| C7       | C8       | N1       | O1       | -37.6(15)      |
| C7       | C8       | N1       | O2       | 139.6(11)      |
| C10      | C11      | C16      | C15      | 180.0(8)       |
| C10      | C11      | C12      | C13      | -178.0(8)      |
| C10      | C9       | C17      | C18      | -177.0(7)      |

---

|     |     |     |     |           |
|-----|-----|-----|-----|-----------|
| C10 | C9  | C17 | C24 | 59.3(8)   |
| C9  | C7  | C8  | N1  | 167.1(7)  |
| C5  | C4  | C7  | C9  | -82.0(8)  |
| C5  | C4  | C7  | C8  | 150.6(7)  |
| C5  | C4  | C3  | C2  | -0.4(11)  |
| C5  | C6  | C1  | Br1 | 178.2(7)  |
| C5  | C6  | C1  | C2  | 0.1(15)   |
| C8  | C7  | C9  | C10 | 54.9(8)   |
| C8  | C7  | C9  | C17 | -69.3(8)  |
| C3  | C4  | C7  | C9  | 92.6(8)   |
| C3  | C4  | C7  | C8  | -34.7(10) |
| C3  | C4  | C5  | C6  | -1.4(12)  |
| C3  | C2  | C1  | Br1 | -179.7(6) |
| C3  | C2  | C1  | C6  | -1.7(14)  |
| C16 | C11 | C10 | O3  | -6.0(10)  |
| C16 | C11 | C10 | C9  | 170.2(7)  |
| C16 | C11 | C12 | C13 | 0.2(13)   |
| C16 | C15 | C14 | C13 | 3.7(15)   |
| C18 | C19 | C20 | C21 | 0.0       |
| C19 | C18 | C23 | C22 | 0.0       |
| C19 | C18 | C17 | C9  | -60.8(8)  |
| C19 | C18 | C17 | C24 | 59.0(9)   |
| C19 | C20 | C21 | C22 | 0.0       |
| C20 | C21 | C22 | C23 | 0.0       |
| C21 | C22 | C23 | C18 | 0.0       |
| C23 | C18 | C19 | C20 | 0.0       |
| C23 | C18 | C17 | C9  | 121.2(6)  |
| C23 | C18 | C17 | C24 | -119.0(8) |
| C14 | C13 | C12 | C11 | -0.1(17)  |
| C12 | C11 | C10 | O3  | 172.2(8)  |
| C12 | C11 | C10 | C9  | -11.6(11) |
| C12 | C11 | C16 | C15 | 1.7(12)   |
| C12 | C13 | C14 | C15 | -1.9(17)  |
| C25 | C24 | C17 | C9  | -177.1(8) |
| C25 | C24 | C17 | C18 | 60.2(11)  |
| C17 | C18 | C19 | C20 | -178.0(7) |
| C17 | C18 | C23 | C22 | 178.0(7)  |

**Table 7** Hydrogen Atom Coordinates ( $\text{\AA} \times 10^4$ ) and Isotropic Displacement Parameters ( $\text{\AA}^2 \times 10^3$ ) for Nicy-1.

| Atom | x    | y     | z     | U(eq) |
|------|------|-------|-------|-------|
| H7   | 2764 | 8742  | 1081  | 118   |
| H9   | 2053 | 8199  | 2331  | 128   |
| H5   | 3021 | 9709  | 2048  | 140   |
| H8B  | 3481 | 7881  | 1311  | 138   |
| H8A  | 2845 | 7670  | 635   | 138   |
| H3   | 4057 | 8543  | 2348  | 129   |
| H16  | 2377 | 6459  | 3590  | 159   |
| H2   | 4842 | 9373  | 3367  | 156   |
| H19  | 1155 | 8491  | 1698  | 216   |
| H20  | 913  | 9279  | 860   | 281   |
| H21  | 954  | 9201  | -587  | 277   |
| H22  | 1238 | 8336  | -1195 | 260   |
| H23  | 1480 | 7548  | -358  | 244   |
| H6   | 3735 | 10522 | 3095  | 163   |
| H15  | 2353 | 6469  | 5060  | 188   |
| H13  | 2363 | 8420  | 4960  | 200   |
| H14  | 2420 | 7510  | 5742  | 173   |
| H12  | 2321 | 8399  | 3520  | 162   |
| H24B | 650  | 7224  | 2263  | 195   |
| H24A | 876  | 6589  | 2267  | 195   |
| H25A | 108  | 6006  | 1037  | 299   |
| H25C | -66  | 6672  | 948   | 299   |
| H25B | -417 | 6095  | 1692  | 299   |
| H17  | 1581 | 7086  | 983   | 158   |

## Experimental

Single crystals of  $\text{C}_{25}\text{H}_{24}\text{BrNO}_3$  [Nicy-1] were recrystallised from [solvents] mounted in inert oil and transferred to the cold gas stream of the diffractometer.

### Crystal structure determination of [Nicy-1]

**Crystal Data.**  $\text{C}_{25}\text{H}_{24}\text{BrNO}_3$ ,  $M=466.36$ , trigonal,  $a = 20.3125(12) \text{\AA}$ ,  $c = 15.9673(11) \text{\AA}$ ,  $U = 5705.4(6) \text{\AA}^3$ ,  $T = 293(2)$ , space group R3 (no. 146),  $Z = 9$ ,  $\mu(\text{Cu K}\alpha) = 2.390$ , 3385 reflections measured, 4702 unique ( $R_{\text{int}} = 0.0281$ ) which were used in all calculations. The final  $wR(F_2)$  was 0.1980 (all data).

### X-ray crystallographic data for compound 5a

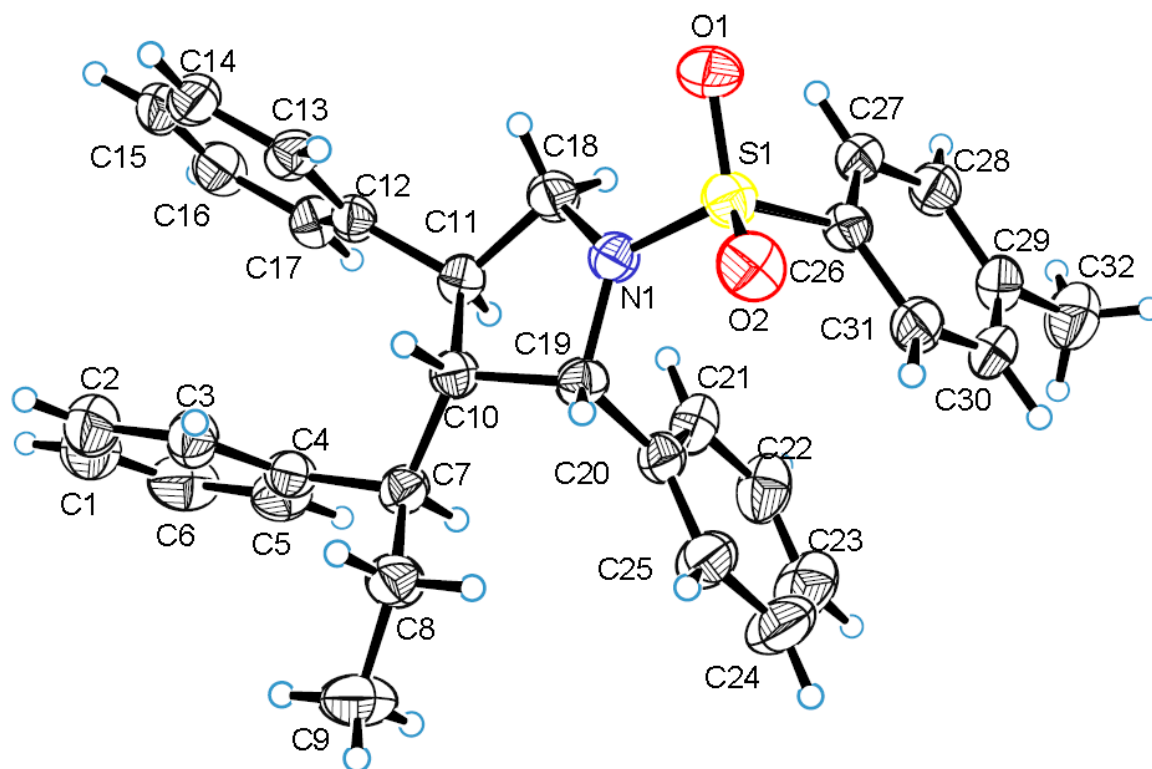

**Table 1** Crystal data and structure refinement for ncy-2

|                                      |                                                  |
|--------------------------------------|--------------------------------------------------|
| Identification code                  | ncy-2                                            |
| Empirical formula                    | C <sub>32</sub> H <sub>33</sub> NSO <sub>2</sub> |
| Formula weight                       | 495.65                                           |
| Temperature                          | 291(2)                                           |
| Crystal system                       | Orthorhombic                                     |
| Space group                          | P2 <sub>1</sub> 2 <sub>1</sub> 2 <sub>1</sub>    |
| a/Å, b/Å, c/Å                        | 7.4163(3), 14.0432(6), 25.9274(10)               |
| α/°, β/°, γ/°                        | 90.00, 90.00, 90.00                              |
| Volume/Å <sup>3</sup>                | 2700.30(19)                                      |
| Z                                    | 4                                                |
| ρ <sub>calc</sub> mg/mm <sup>3</sup> | 1.219                                            |
| μ / mm <sup>-1</sup>                 | 0.149                                            |
| F(000)                               | 1056                                             |
| Crystal size                         | 0.40 × 0.30 × 0.24                               |
| Theta range for data collection      | 2.90 to 26.37°                                   |
| Index ranges                         | -9 ≤ h ≤ 9, -11 ≤ k ≤ 17, -32 ≤ l ≤ 32           |
| Reflections collected                | 14601                                            |
| Independent reflections              | 5528[R(int) = 0.0442]                            |
| Data/restraints/parameters           | 5528/0/327                                       |
| Goodness-of-fit on F <sup>2</sup>    | 1.012                                            |

---

|                                      |                                  |
|--------------------------------------|----------------------------------|
| Final R indexes [ $I > 2\sigma(I)$ ] | $R_1 = 0.0517$ , $wR_2 = 0.0886$ |
| Final R indexes [all data]           | $R_1 = 0.0890$ , $wR_2 = 0.1012$ |
| Largest diff. peak/hole              | 0.146/-0.208                     |

**Table 2** Atomic Coordinates ( $\text{\AA} \times 10^4$ ) and Equivalent Isotropic Displacement Parameters ( $\text{\AA}^2 \times 10^3$ ) for ncy-2.  $U_{\text{eq}}$  is defined as 1/3 of the trace of the orthogonalised  $U_{ij}$  tensor.

| Atom | x          | y          | z          | U(eq)     |
|------|------------|------------|------------|-----------|
| S1   | 5085.9(10) | 3890.7(5)  | 1848.8(2)  | 51.91(19) |
| O1   | 4209(3)    | 2980.6(12) | 1847.9(7)  | 64.1(5)   |
| N1   | 5269(3)    | 4207.1(13) | 1251.1(7)  | 44.7(5)   |
| O2   | 6841(3)    | 4001.2(14) | 2074.5(7)  | 65.9(5)   |
| C11  | 4528(3)    | 4426.4(18) | 362.7(9)   | 44.9(6)   |
| C12  | 4241(3)    | 3774.1(18) | -97.1(9)   | 44(6)     |
| C29  | 1316(4)    | 6132(2)    | 2494.6(10) | 60.1(8)   |
| C10  | 6500(3)    | 4722.3(17) | 476.4(9)   | 43.8(6)   |
| C26  | 3620(4)    | 4712.7(18) | 2146.9(10) | 46.8(7)   |
| C7   | 7294(4)    | 5519.5(18) | 135.9(10)  | 48.8(7)   |
| C18  | 3894(4)    | 3949(2)    | 868.1(9)   | 54.5(7)   |
| C20  | 5886(4)    | 5964.4(19) | 1207.2(9)  | 49.7(7)   |
| C17  | 3146(4)    | 4043(2)    | -503.8(10) | 53.3(7)   |
| C13  | 5056(4)    | 2883.6(17) | -120.4(10) | 52.6(7)   |
| C27  | 1777(4)    | 4611.2(19) | 2087.5(10) | 53.3(7)   |
| C4   | 7099(4)    | 5305.7(18) | -437(10)   | 49.6(7)   |
| C19  | 6482(4)    | 4959.1(18) | 1062.5(9)  | 45.1(6)   |
| C8   | 9284(4)    | 5704(2)    | 275.5(11)  | 59.8(8)   |
| C6   | 5870(5)    | 5674(3)    | -1274(14)  | 82.2(11)  |
| C31  | 4309(4)    | 5504(2)    | 2394(10)   | 58.8(8)   |
| C28  | 636(4)     | 5324(2)    | 2260.1(11) | 60.4(8)   |
| C15  | 3713(4)    | 2584(2)    | -941.8(12) | 69.4(10)  |
| C14  | 4787(4)    | 2297(2)    | -537.1(12) | 63.2(8)   |
| C21  | 4113(4)    | 6265(2)    | 1157.6(11) | 61(8)     |
| C16  | 2888(4)    | 3452(2)    | -925.1(11) | 66(9)     |
| C3   | 8002(4)    | 4552(2)    | -662(11)   | 59.7(8)   |
| C25  | 7100(5)    | 6588(2)    | 1418.2(11) | 70.3(9)   |
| C30  | 3164(5)    | 6209(2)    | 2566.2(10) | 63.4(8)   |
| C5   | 6031(4)    | 5865(2)    | -748.4(12) | 65.2(9)   |
| C9   | 10103(5)   | 6543(2)    | -2.8(13)   | 86.2(11)  |

|     |         |         |             |          |
|-----|---------|---------|-------------|----------|
| C32 | 79(6)   | 6938(2) | 2659.7(12)  | 86.7(10) |
| C2  | 7837(5) | 4356(2) | -1181.3(14) | 78.2(10) |
| C1  | 6788(6) | 4925(3) | -1486.3(13) | 85.8(12) |
| C23 | 4815(7) | 7784(2) | 1509.7(14)  | 92.9(12) |
| C22 | 3598(5) | 7170(2) | 1306.9(12)  | 80.4(10) |
| C24 | 6564(6) | 7509(3) | 1568.2(14)  | 91.4(12) |

**Table 3** Anisotropic Displacement Parameters ( $\text{\AA}^2 \times 10^3$ ) for *ncy-2*. The Anisotropic displacement factor exponent takes the form:  $-2\pi^2[h^2a^{*2}U_{11} + \dots + 2hka \times b \times U_{12}]$

| Atom | $U_{11}$ | $U_{22}$ | $U_{33}$ | $U_{23}$  | $U_{13}$  | $U_{12}$  |
|------|----------|----------|----------|-----------|-----------|-----------|
| S1   | 56.3(4)  | 51.5(4)  | 47.9(4)  | 6(3)      | -4.1(4)   | 0.9(4)    |
| O1   | 79.6(14) | 43.6(11) | 69(13)   | 11.2(9)   | 1.9(11)   | -4.3(10)  |
| N1   | 45.3(13) | 46.6(12) | 42.2(12) | -0.2(9)   | -2.2(11)  | -3.1(11)  |
| O2   | 56.2(12) | 81.3(14) | 60.3(12) | 10.8(11)  | -15.2(10) | 3.4(11)   |
| C11  | 40.1(16) | 49.6(15) | 44.9(15) | -3.2(11)  | -2.7(12)  | 2.8(12)   |
| C12  | 38.4(14) | 50.4(16) | 43.1(15) | -4(12)    | 1.5(12)   | -4.5(13)  |
| C29  | 72(2)    | 62.8(19) | 45.8(17) | -6.4(15)  | 4.8(15)   | -1.4(18)  |
| C10  | 41.7(15) | 42.8(15) | 46.8(15) | -2.4(12)  | 2.8(12)   | 0.3(12)   |
| C26  | 51.7(18) | 48.8(17) | 39.9(15) | 1(12)     | 0.6(12)   | -6.9(14)  |
| C7   | 53.1(17) | 43.4(15) | 49.9(17) | -2.1(12)  | 0(13)     | -0.5(13)  |
| C18  | 49(18)   | 64.7(18) | 49.7(17) | -3.6(14)  | -1(13)    | -12.8(16) |
| C20  | 63(18)   | 48.9(18) | 37.2(15) | 1.7(12)   | -1.4(13)  | -3.9(15)  |
| C17  | 47.9(17) | 62.7(18) | 49.3(17) | -0.6(14)  | -5.1(13)  | 0.8(14)   |
| C13  | 42.2(15) | 51.5(16) | 64.2(17) | -7.4(13)  | -2(15)    | -3.6(15)  |
| C27  | 54.8(18) | 56.4(17) | 48.7(16) | -8.4(13)  | 5.1(14)   | -11.2(15) |
| C4   | 49.7(18) | 51.8(17) | 47.1(16) | 3(13)     | -0.8(13)  | -8.9(14)  |
| C19  | 43.3(16) | 46.9(16) | 44.9(15) | 0.6(11)   | -6.5(12)  | -2.5(13)  |
| C8   | 55.4(18) | 71(2)    | 53(17)   | -1.3(14)  | -3.7(14)  | -14.9(16) |
| C6   | 92(3)    | 85(3)    | 70(2)    | 27.5(19)  | -26(2)    | -17(2)    |
| C31  | 55.6(18) | 74(2)    | 46.7(17) | -6.8(14)  | -3.6(14)  | -14.9(17) |
| C28  | 50.2(19) | 70(2)    | 60.4(19) | -10.4(15) | 7.7(14)   | -7.8(16)  |
| C15  | 72(2)    | 80(2)    | 56(2)    | -24.5(16) | 19.2(17)  | -31(2)    |
| C14  | 50.5(19) | 57.4(17) | 82(2)    | -18.3(16) | 15(18)    | -8.7(16)  |
| C21  | 76(2)    | 57(2)    | 50.1(18) | -7.6(14)  | -5.2(16)  | 11.7(17)  |
| C16  | 64(2)    | 88(2)    | 45.9(18) | -0.7(16)  | -8.2(16)  | -20.4(19) |
| C3   | 61(2)    | 67(19)   | 50.6(18) | -6.3(14)  | 0.7(15)   | -0.7(17)  |
| C25  | 84(3)    | 61(2)    | 66(2)    | -7.5(16)  | -6.1(18)  | -11.8(19) |
| C30  | 75(2)    | 63.8(19) | 51(18)   | -18.5(15) | 2(17)     | -15.1(19) |
| C5   | 72(2)    | 56.1(19) | 67(2)    | 11.9(15)  | -11(17)   | -4.4(17)  |
| C9   | 82(3)    | 80(2)    | 97(2)    | 10.4(18)  | -9(2)     | -33(2)    |



|     |        |       |        |           |       |        |
|-----|--------|-------|--------|-----------|-------|--------|
| C32 | 102(3) | 80(2) | 78(2)  | -17.1(17) | 2(2)  | 15(2)  |
| C2  | 79(3)  | 88(3) | 67(2)  | -16.1(19) | 7(2)  | -11(2) |
| C1  | 108(3) | 98(3) | 51(2)  | 0(2)      | -6(2) | -27(3) |
| C23 | 140(4) | 48(2) | 91(3)  | -7.5(17)  | -3(3) | 17(3)  |
| C22 | 107(3) | 69(2) | 66(2)  | -2.7(18)  | -5(2) | 26(2)  |
| C24 | 114(3) | 58(2) | 102(3) | -18(19)   | -7(3) | -17(2) |

**Table 4 Bond Lengths for ncy-2.**

| Atom | Atom | Length/Å   | Atom | Atom | Length/Å |
|------|------|------------|------|------|----------|
| S1   | O1   | 1.4341(18) | C20  | C25  | 1.370(4) |
| S1   | O2   | 1.4355(19) | C20  | C21  | 1.387(4) |
| S1   | N1   | 1.618(2)   | C20  | C19  | 1.526(3) |
| S1   | C26  | 1.764(3)   | C17  | C16  | 1.385(4) |
| N1   | C18  | 1.469(3)   | C13  | C14  | 1.373(3) |
| N1   | C19  | 1.471(3)   | C27  | C28  | 1.384(4) |
| C11  | C12  | 1.518(3)   | C4   | C5   | 1.376(4) |
| C11  | C18  | 1.545(3)   | C4   | C3   | 1.382(3) |
| C11  | C10  | 1.549(3)   | C8   | C9   | 1.509(4) |
| C12  | C17  | 1.383(3)   | C6   | C1   | 1.368(5) |
| C12  | C13  | 1.391(3)   | C6   | C5   | 1.394(4) |
| C29  | C28  | 1.383(4)   | C31  | C30  | 1.379(4) |
| C29  | C30  | 1.387(4)   | C15  | C16  | 1.365(4) |
| C29  | C32  | 1.518(4)   | C15  | C14  | 1.378(4) |
| C10  | C7   | 1.542(3)   | C21  | C22  | 1.382(4) |
| C10  | C19  | 1.556(3)   | C3   | C2   | 1.380(4) |
| C26  | C31  | 1.380(3)   | C25  | C24  | 1.408(4) |
| C26  | C27  | 1.383(4)   | C2   | C1   | 1.368(4) |
| C7   | C4   | 1.522(3)   | C23  | C22  | 1.356(5) |
| C7   | C8   | 1.542(4)   | C23  | C24  | 1.362(5) |

**Table 5 Bond Angles for ncy-2.**

| Atom | Atom | Atom | Angle/°    | Atom | Atom | Atom | Angle/°  |
|------|------|------|------------|------|------|------|----------|
| O1   | S1   | O2   | 120.55(12) | C25  | C20  | C19  | 120.0(3) |
| O1   | S1   | N1   | 106.33(11) | C21  | C20  | C19  | 122.2(3) |
| O2   | S1   | N1   | 106.55(11) | C12  | C17  | C16  | 121.3(3) |
| O1   | S1   | C26  | 107.72(12) | C14  | C13  | C12  | 120.7(3) |
| O2   | S1   | C26  | 108.04(13) | C26  | C27  | C28  | 119.6(3) |
| N1   | S1   | C26  | 106.95(11) | C5   | C4   | C3   | 117.9(3) |
| C18  | N1   | C19  | 112.15(19) | C5   | C4   | C7   | 121.0(3) |
| C18  | N1   | S1   | 121.45(16) | C3   | C4   | C7   | 121.1(2) |

|     |     |     |            |     |     |     |            |
|-----|-----|-----|------------|-----|-----|-----|------------|
| C19 | N1  | S1  | 124.53(16) | N1  | C19 | C20 | 113.9(2)   |
| C12 | C11 | C18 | 111.2(2)   | N1  | C19 | C10 | 100.16(18) |
| C12 | C11 | C10 | 116.3(2)   | C20 | C19 | C10 | 116.1(2)   |
| C18 | C11 | C10 | 104.0(2)   | C9  | C8  | C7  | 113.8(3)   |
| C17 | C12 | C13 | 117.9(2)   | C1  | C6  | C5  | 119.9(3)   |
| C17 | C12 | C11 | 121.1(2)   | C30 | C31 | C26 | 120.0(3)   |
| C13 | C12 | C11 | 121.1(2)   | C29 | C28 | C27 | 120.8(3)   |
| C28 | C29 | C30 | 118.9(3)   | C16 | C15 | C14 | 119.7(3)   |
| C28 | C29 | C32 | 121.0(3)   | C13 | C14 | C15 | 120.5(3)   |
| C30 | C29 | C32 | 120.1(3)   | C22 | C21 | C20 | 121.1(3)   |
| C7  | C10 | C11 | 116.5(2)   | C15 | C16 | C17 | 119.9(3)   |
| C7  | C10 | C19 | 114.0(2)   | C2  | C3  | C4  | 121.5(3)   |
| C11 | C10 | C19 | 103.60(19) | C20 | C25 | C24 | 120.8(4)   |
| C31 | C26 | C27 | 120.0(3)   | C31 | C30 | C29 | 120.6(3)   |
| C31 | C26 | S1  | 120.1(2)   | C4  | C5  | C6  | 120.9(3)   |
| C27 | C26 | S1  | 119.5(2)   | C1  | C2  | C3  | 119.8(3)   |
| C4  | C7  | C8  | 110.7(2)   | C2  | C1  | C6  | 120.0(3)   |
| C4  | C7  | C10 | 112.3(2)   | C22 | C23 | C24 | 119.8(3)   |
| C8  | C7  | C10 | 110.7(2)   | C23 | C22 | C21 | 120.6(4)   |
| N1  | C18 | C11 | 104.8(2)   | C23 | C24 | C25 | 119.9(3)   |
| C25 | C20 | C21 | 117.8(3)   |     |     |     |            |

**Table 6** Torsion Angles for ncy-2.

| <b>A</b> | <b>B</b> | <b>C</b> | <b>D</b> | <b>Angle/°</b> |
|----------|----------|----------|----------|----------------|
| O1       | S1       | N1       | C18      | 33.5(2)        |
| O2       | S1       | N1       | C18      | 163.27(19)     |
| C26      | S1       | N1       | C18      | -81.4(2)       |
| O1       | S1       | N1       | C19      | -163.32(19)    |
| O2       | S1       | N1       | C19      | -33.6(2)       |
| C26      | S1       | N1       | C19      | 81.8(2)        |
| C18      | C11      | C12      | C17      | 120.0(3)       |
| C10      | C11      | C12      | C17      | -121.2(3)      |
| C18      | C11      | C12      | C13      | -59.3(3)       |
| C10      | C11      | C12      | C13      | 59.5(3)        |
| C12      | C11      | C10      | C7       | 78.8(3)        |
| C18      | C11      | C10      | C7       | -158.6(2)      |
| C12      | C11      | C10      | C19      | -155.1(2)      |
| C18      | C11      | C10      | C19      | -32.5(2)       |
| O1       | S1       | C26      | C31      | 152.8(2)       |
| O2       | S1       | C26      | C31      | 21.1(2)        |

---

|     |     |     |     |            |
|-----|-----|-----|-----|------------|
| N1  | S1  | C26 | C31 | -93.2(2)   |
| O1  | S1  | C26 | C27 | -33.6(2)   |
| O2  | S1  | C26 | C27 | -165.3(2)  |
| N1  | S1  | C26 | C27 | 80.4(2)    |
| C11 | C10 | C7  | C4  | -53.1(3)   |
| C19 | C10 | C7  | C4  | -173.7(2)  |
| C11 | C10 | C7  | C8  | -177.3(2)  |
| C19 | C10 | C7  | C8  | 62.0(3)    |
| C19 | N1  | C18 | C11 | 12.1(3)    |
| S1  | N1  | C18 | C11 | 177.18(16) |
| C12 | C11 | C18 | N1  | 139.4(2)   |
| C10 | C11 | C18 | N1  | 13.5(3)    |
| C13 | C12 | C17 | C16 | -1.0(4)    |
| C11 | C12 | C17 | C16 | 179.6(3)   |
| C17 | C12 | C13 | C14 | 0.5(4)     |
| C11 | C12 | C13 | C14 | 179.9(2)   |
| C31 | C26 | C27 | C28 | 2.4(4)     |
| S1  | C26 | C27 | C28 | -171.2(2)  |
| C8  | C7  | C4  | C5  | -120.8(3)  |
| C10 | C7  | C4  | C5  | 115.0(3)   |
| C8  | C7  | C4  | C3  | 58.4(3)    |
| C10 | C7  | C4  | C3  | -65.8(3)   |
| C18 | N1  | C19 | C20 | 92.8(2)    |
| S1  | N1  | C19 | C20 | -71.8(3)   |
| C18 | N1  | C19 | C10 | -31.9(3)   |
| S1  | N1  | C19 | C10 | 163.54(17) |
| C25 | C20 | C19 | N1  | 131.6(3)   |
| C21 | C20 | C19 | N1  | -45.0(3)   |
| C25 | C20 | C19 | C10 | -112.8(3)  |
| C21 | C20 | C19 | C10 | 70.6(3)    |
| C7  | C10 | C19 | N1  | 166.2(2)   |
| C11 | C10 | C19 | N1  | 38.5(2)    |
| C7  | C10 | C19 | C20 | 43.0(3)    |
| C11 | C10 | C19 | C20 | -84.6(3)   |
| C4  | C7  | C8  | C9  | 60.8(3)    |
| C10 | C7  | C8  | C9  | -174.0(2)  |
| C27 | C26 | C31 | C30 | -2.2(4)    |
| S1  | C26 | C31 | C30 | 171.3(2)   |
| C30 | C29 | C28 | C27 | -1.6(4)    |
| C32 | C29 | C28 | C27 | 176.8(3)   |

|     |     |     |     |           |
|-----|-----|-----|-----|-----------|
| C26 | C27 | C28 | C29 | -0.5(4)   |
| C12 | C13 | C14 | C15 | 0.4(4)    |
| C16 | C15 | C14 | C13 | -0.9(4)   |
| C25 | C20 | C21 | C22 | 1.2(4)    |
| C19 | C20 | C21 | C22 | 177.9(3)  |
| C14 | C15 | C16 | C17 | 0.4(5)    |
| C12 | C17 | C16 | C15 | 0.5(4)    |
| C5  | C4  | C3  | C2  | -0.5(4)   |
| C7  | C4  | C3  | C2  | -179.8(3) |
| C21 | C20 | C25 | C24 | -1.4(4)   |
| C19 | C20 | C25 | C24 | -178.1(3) |
| C26 | C31 | C30 | C29 | 0.1(4)    |
| C28 | C29 | C30 | C31 | 1.8(4)    |
| C32 | C29 | C30 | C31 | -176.7(3) |
| C3  | C4  | C5  | C6  | 0.0(4)    |
| C7  | C4  | C5  | C6  | 179.3(3)  |
| C1  | C6  | C5  | C4  | -0.3(5)   |
| C4  | C3  | C2  | C1  | 1.3(5)    |
| C3  | C2  | C1  | C6  | -1.6(5)   |
| C5  | C6  | C1  | C2  | 1.1(5)    |
| C24 | C23 | C22 | C21 | -0.1(6)   |
| C20 | C21 | C22 | C23 | -0.5(5)   |
| C22 | C23 | C24 | C25 | 0.0(6)    |
| C20 | C25 | C24 | C23 | 0.8(5)    |

**Table 7** Hydrogen Atom Coordinates ( $\text{\AA} \times 10^4$ ) and Isotropic Displacement Parameters ( $\text{\AA}^2 \times 10^3$ ) for ncy-2.

| Atom | x    | y    | z     | U(eq) |
|------|------|------|-------|-------|
| H11  | 3813 | 5005 | 310   | 54    |
| H10  | 7256 | 4156 | 430   | 53    |
| H7   | 6619 | 6104 | 208   | 59    |
| H18B | 2718 | 4186 | 970   | 65    |
| H18A | 3825 | 3263 | 828   | 65    |
| H17  | 2573 | 4631 | -494  | 64    |
| H13  | 5792 | 2683 | 149   | 63    |
| H27  | 1306 | 4068 | 1933  | 64    |
| H19  | 7690 | 4848 | 1203  | 54    |
| H8B  | 9372 | 5812 | 644   | 72    |
| H8A  | 9981 | 5138 | 195   | 72    |
| H6   | 5140 | 6055 | -1480 | 99    |

---

|      |       |      |       |     |
|------|-------|------|-------|-----|
| H31  | 5546  | 5561 | 2445  | 71  |
| H28  | -603  | 5258 | 2218  | 72  |
| H15  | 3549  | 2187 | -1225 | 83  |
| H14  | 5335  | 1702 | -546  | 76  |
| H21  | 3258  | 5851 | 1022  | 73  |
| H16  | 2155  | 3647 | -1196 | 79  |
| H3   | 8737  | 4169 | -459  | 72  |
| H25  | 8293  | 6400 | 1463  | 84  |
| H30  | 3635  | 6741 | 2732  | 76  |
| H5   | 5409  | 6376 | -606  | 78  |
| H9A  | 10106 | 6421 | -367  | 129 |
| H9C  | 11318 | 6636 | 114   | 129 |
| H9B  | 9406  | 7104 | 67    | 129 |
| H32A | -1113 | 6824 | 2529  | 130 |
| H32C | 526   | 7529 | 2525  | 130 |
| H32B | 42    | 6969 | 3029  | 130 |
| H2   | 8438  | 3837 | -1324 | 94  |
| H1   | 6699  | 4804 | -1838 | 103 |
| H23  | 4458  | 8392 | 1609  | 111 |
| H22  | 2403  | 7358 | 1268  | 96  |
| H24  | 7404  | 7929 | 1707  | 110 |

## Experimental

Single crystals of  $C_{32}H_{33}NSO_2$  were recrystallised from hexane and ethyl acetate mounted in inert oil and transferred to the cold gas stream of the diffractometer.

### Crystal structure determination of [ncy-2]

**Crystal Data.**  $C_{32}H_{33}NSO_2$ ,  $M=495.65$ , Orthorhombic,  $a = 7.4163(3) \text{ \AA}$ ,  $b = 14.0432(6) \text{ \AA}$ ,  $c = 25.9274(10) \text{ \AA}$ ,  $U = 2700.30(19) \text{ \AA}^3$ ,  $T = 291(2)$ , space group  $P2_12_12_1$  (no. 19),  $Z = 4$ ,  $\mu(\text{Mo-K}\alpha) = 0.149$ , 14601 reflections measured, 5528 unique ( $R_{\text{int}} = 0.0442$ ) which were used in all calculations. The final  $wR(F_2)$  was 0.1012 (all data).
